# Supplementary material for: Physiological Changes in Barley mlo-11 Powdery Mildew Resistance Conditioned by Tandem Repeat Copy Number
Source: Int J Mol Sci. 2020 Nov 20;21(22):8769. doi: 10.3390/ijms21228769 (PMC7699567; doi:10.3390/ijms21228769)
Supplement: Supplementary file 1 [file ijms-21-08769-s001.zip]

Archive with 4 entries (4 files):
- CNV2-IJMS-SupplementaryFigures.pdf
- SupplementaryTable1.xlsx
- SupplementaryTable2.xlsx
- SupplementaryTable3.xlsx
