# Supplementary material for: Physiological Changes in Barley mlo-11 Powdery Mildew Resistance Conditioned by Tandem Repeat Copy Number
Source: Int J Mol Sci. 2020 Nov 20;21(22):8769. doi: 10.3390/ijms21228769 (PMC7699567; doi:10.3390/ijms21228769)
Supplement: Supplementary file 1 [file ijms-21-08769-s001.zip › SupplementaryTable1.xlsx]

## Sheet: most-significant
Supplementary Table 1. Baudin NILs genes significantly regulated between Bgh inoculated and control samples (not inoculated)
Gene	baseMean	log2FoldChange	lfcSE	stat	pvalue	padj
HORVU2Hr1G000050	69.3923	1.92507	0.258793	7.43864	1.01725e-13	8.34744e-13
HORVU2Hr1G000090	15.4793	-3.6285	1.11173	-3.26384	0.00109914	0.00349727
HORVU2Hr1G000140	136.212	1.39237	0.198585	7.01146	2.35851e-12	1.77877e-11
HORVU2Hr1G001380	53.3773	-1.10464	0.268551	-4.11334	3.89975e-05	0.000155157
HORVU2Hr1G001560	3.69083	-4.53568	1.45521	-3.11687	0.00182783	0.00556169
HORVU2Hr1G001780	237.603	2.00152	0.142473	14.0484	7.87674e-45	1.70167e-43
HORVU2Hr1G001790	125.491	1.36504	0.204007	6.69115	2.21424e-11	1.57539e-10
HORVU2Hr1G002020	17.4113	3.23665	0.594994	5.43979	5.3342e-08	2.94145e-07
HORVU2Hr1G002750	774.146	3.30725	0.117422	28.1656	1.54282e-174	1.28287e-172
HORVU2Hr1G002830	92.4364	3.01026	0.272593	11.0431	2.3679e-28	3.45995e-27
HORVU2Hr1G002840	518.984	7.21723	0.234806	30.737	1.82437e-207	2.0082e-205
HORVU2Hr1G003040	207.751	1.60723	0.143157	11.2271	3.00272e-29	4.52483e-28
HORVU2Hr1G003130	1.9026	4.8422	1.64556	2.94259	0.00325483	0.00938488
HORVU2Hr1G003230	140.788	2.64818	0.185772	14.255	4.17332e-46	9.18767e-45
HORVU2Hr1G003390	21.4777	-8.02202	1.23639	-6.48826	8.68341e-11	5.91588e-10
HORVU2Hr1G003640	89.8009	3.72316	0.295479	12.6004	2.09984e-36	3.74247e-35
HORVU2Hr1G003750	468.605	2.27396	0.0990405	22.9599	1.17411e-116	6.09906e-115
HORVU2Hr1G004140	39.3834	2.65184	0.329491	8.04828	8.39661e-16	7.6627e-15
HORVU2Hr1G004150	30.0875	2.56761	0.484003	5.30494	1.12708e-07	6.00313e-07
HORVU2Hr1G004480	568.049	1.90833	0.10767	17.7239	2.74073e-70	8.70258e-69
HORVU2Hr1G004510	10.5215	2.54468	0.796058	3.19661	0.00139054	0.00433437
HORVU2Hr1G004540	315.856	1.15771	0.131698	8.79065	1.48701e-18	1.54906e-17
HORVU2Hr1G004550	2776.37	1.40585	0.0624695	22.5046	3.74025e-112	1.85935e-110
HORVU2Hr1G005170	65.689	-2.75969	0.826921	-3.33731	0.000845927	0.0027495
HORVU2Hr1G005470	67.308	1.1001	0.222886	4.9357	7.98644e-07	3.90884e-06
HORVU2Hr1G006000	277.2	2.22589	0.157836	14.1026	3.66082e-45	7.93841e-44
HORVU2Hr1G006100	81.7585	1.81335	0.277726	6.52926	6.60967e-11	4.53112e-10
HORVU2Hr1G007420	2.89198	4.5609	1.54584	2.95043	0.00317335	0.00916595
HORVU2Hr1G007490	391.903	-1.20213	0.115876	-10.3742	3.24861e-25	4.32575e-24
HORVU2Hr1G007840	4489.51	-1.07495	0.0438223	-24.5299	7.09063e-133	4.20275e-131
HORVU2Hr1G008130	126.789	2.8783	0.202911	14.1851	1.13375e-45	2.47711e-44
HORVU2Hr1G008140	255.845	1.96956	0.144789	13.603	3.84413e-42	7.73376e-41
HORVU2Hr1G008390	536.901	1.93738	0.0906105	21.3814	1.99077e-101	8.98802e-100
HORVU2Hr1G009900	10.7384	-1.28638	0.528446	-2.43426	0.0149223	0.0369279
HORVU2Hr1G009970	150.036	-1.51418	0.17709	-8.55033	1.2274e-17	1.22086e-16
HORVU2Hr1G009980	27.2916	-1.62683	0.41687	-3.9025	9.52039e-05	0.000357668
HORVU2Hr1G010560	1668.34	2.48426	0.0773032	32.1366	1.36046e-226	1.70915e-224
HORVU2Hr1G010590	218.346	1.5873	0.158496	10.0147	1.31304e-23	1.66588e-22
HORVU2Hr1G010610	122.826	2.50567	0.199891	12.5352	4.79368e-36	8.5239e-35
HORVU2Hr1G010630	249.564	-7.81932	0.732232	-10.6788	1.27983e-26	1.77898e-25
HORVU2Hr1G010830	193.84	4.26011	0.289791	14.7007	6.38253e-49	1.47244e-47
HORVU2Hr1G010840	296.836	4.41309	0.191377	23.0597	1.17617e-117	6.17918e-116
HORVU2Hr1G010990	557.909	-1.32819	0.105246	-12.6199	1.63984e-36	2.94078e-35
HORVU2Hr1G011030	143.917	-1.31768	0.177659	-7.41693	1.19864e-13	9.7942e-13
HORVU2Hr1G011070	82.2243	-1.09064	0.353829	-3.08238	0.00205353	0.00617851
HORVU2Hr1G011120	6.41816	-5.47598	1.32306	-4.13888	3.49009e-05	0.000139991
HORVU2Hr1G011180	4.76372	-4.5154	1.43223	-3.1527	0.00161769	0.00497599
HORVU2Hr1G012130	16.5322	2.81855	0.544719	5.17432	2.28748e-07	1.18241e-06
HORVU2Hr1G012250	3.89513	-4.17262	1.47134	-2.83593	0.00456918	0.0127995
HORVU2Hr1G012260	5.00608	-4.97458	1.4257	-3.48922	0.000484428	0.0016393
HORVU2Hr1G012270	10.5882	-5.10249	1.15259	-4.42699	9.55591e-06	4.14125e-05
HORVU2Hr1G012280	128.039	-7.23648	0.751541	-9.62886	6.03972e-22	7.23389e-21
HORVU2Hr1G012340	162.264	-7.218	0.664598	-10.8607	1.7736e-27	2.52609e-26
HORVU2Hr1G012420	53.9016	-1.62356	0.278443	-5.83084	5.51487e-09	3.29751e-08
HORVU2Hr1G012770	3.3424	3.17412	1.29347	2.45396	0.0141294	0.0351918
HORVU2Hr1G012810	217.897	-1.82106	0.137211	-13.2719	3.36916e-40	6.50095e-39
HORVU2Hr1G012980	337.901	1.77249	0.127091	13.9466	3.30094e-44	6.99401e-43
HORVU2Hr1G013170	63.2456	-2.43551	0.326351	-7.46285	8.46729e-14	6.97541e-13
HORVU2Hr1G013300	19.0841	-1.03884	0.430159	-2.41502	0.0157343	0.0386602
HORVU2Hr1G013440	327.586	1.34205	0.113557	11.8183	3.13836e-32	5.10889e-31
HORVU2Hr1G013450	1058.26	-1.75743	0.0675786	-26.0057	4.26959e-149	2.88585e-147
HORVU2Hr1G013760	54.848	1.81852	0.280975	6.47219	9.65925e-11	6.56329e-10
HORVU2Hr1G014150	690.775	2.57504	0.120991	21.2829	1.63612e-100	7.27317e-99
HORVU2Hr1G014450	1824.75	1.43	0.0537065	26.6263	3.37053e-156	2.38997e-154
HORVU2Hr1G014590	141.779	-1.05205	0.156246	-6.73329	1.65864e-11	1.18924e-10
HORVU2Hr1G014600	3.48511	3.64851	1.33896	2.72489	0.00643224	0.0174148
HORVU2Hr1G014710	681.355	2.57414	0.0865064	29.7566	1.42353e-194	1.3711e-192
HORVU2Hr1G014740	15.8815	1.4265	0.519293	2.74701	0.00601421	0.0163809
HORVU2Hr1G014890	308.934	2.00232	0.132224	15.1435	8.37034e-52	2.03244e-50
HORVU2Hr1G014900	742.213	3.39001	0.123962	27.3472	1.16685e-164	8.75745e-163
HORVU2Hr1G014930	634.694	3.69775	0.114186	32.3836	4.67056e-230	6.13436e-228
HORVU2Hr1G015240	13.8754	7.49234	1.27632	5.87027	4.3509e-09	2.62942e-08
HORVU2Hr1G015360	1178.32	1.161	0.076161	15.244	1.80563e-52	4.43089e-51
HORVU2Hr1G015410	41.4676	1.529	0.354408	4.31424	1.60151e-05	6.72246e-05
HORVU2Hr1G015430	35.3787	-1.1418	0.354271	-3.22296	0.00126875	0.00399298
HORVU2Hr1G015470	116.777	-1.48084	0.211805	-6.99154	2.71882e-12	2.04784e-11
HORVU2Hr1G015700	10.0113	1.68937	0.62684	2.69506	0.00703755	0.0188746
HORVU2Hr1G015830	22.5731	5.85296	1.11782	5.23606	1.64039e-07	8.5965e-07
HORVU2Hr1G015850	46.8563	3.10664	0.381486	8.14354	3.83878e-16	3.55803e-15
HORVU2Hr1G016540	8.74816	2.97855	1.01145	2.94484	0.00323121	0.00931911
HORVU2Hr1G016720	543.314	3.11197	0.123635	25.1706	8.40086e-140	5.26272e-138
HORVU2Hr1G017220	8.59968	3.58433	0.7943	4.51256	6.40493e-06	2.83959e-05
HORVU2Hr1G017300	220.581	-1.30812	0.144855	-9.03057	1.70787e-19	1.85696e-18
HORVU2Hr1G017350	193.277	1.24	0.164448	7.54037	4.68623e-14	3.91921e-13
HORVU2Hr1G017440	29.2192	-4.9597	0.55483	-8.93914	3.92202e-19	4.18566e-18
HORVU2Hr1G017650	98.3579	1.08411	0.223849	4.84303	1.27873e-06	6.12245e-06
HORVU2Hr1G017720	56.5495	4.34158	0.595819	7.28674	3.17539e-13	2.51723e-12
HORVU2Hr1G017740	207.465	3.19742	0.231984	13.783	3.22783e-43	6.66796e-42
HORVU2Hr1G017910	32.1191	2.87321	0.424575	6.76726	1.3124e-11	9.46863e-11
HORVU2Hr1G018340	553.087	1.37222	0.1188	11.5506	7.32856e-31	1.15557e-29
HORVU2Hr1G018430	1571.87	3.62776	0.0857468	42.3078	0	0
HORVU2Hr1G018440	11.2222	4.0513	0.891724	4.54323	5.53995e-06	2.47749e-05
HORVU2Hr1G018480	510.992	2.7776	0.0971675	28.5857	1.01274e-179	8.67056e-178
HORVU2Hr1G018510	446.797	2.33922	0.116262	20.1203	4.90052e-90	1.92654e-88
HORVU2Hr1G019120	16.1188	2.19193	0.564383	3.88376	0.000102854	0.00038447
HORVU2Hr1G019180	399.259	2.14723	0.138033	15.5559	1.45088e-54	3.66541e-53
HORVU2Hr1G020030	90.28	-1.20332	0.212191	-5.67095	1.42005e-08	8.22704e-08
HORVU2Hr1G020140	48.959	1.11981	0.305757	3.66241	0.000249853	0.000884337
HORVU2Hr1G020450	5.30451	2.92913	0.986055	2.97056	0.00297261	0.00863902
HORVU2Hr1G020630	12.3471	2.62894	0.798762	3.29127	0.000997352	0.00319496
HORVU2Hr1G022500	429.334	1.54975	0.10662	14.5353	7.24227e-48	1.63969e-46
HORVU2Hr1G022590	26.9751	1.58008	0.383219	4.12317	3.73697e-05	0.000149143
HORVU2Hr1G022600	329.468	1.0937	0.127539	8.57542	9.87272e-18	9.87528e-17
HORVU2Hr1G022620	416.506	1.1518	0.14097	8.17052	3.07067e-16	2.85986e-15
HORVU2Hr1G022800	15.0874	1.95022	0.514498	3.79054	0.000150321	0.000549379
HORVU2Hr1G022960	129.6	2.10009	0.185038	11.3495	7.45528e-30	1.13828e-28
HORVU2Hr1G022970	8.92229	2.32663	0.790863	2.94188	0.00326222	0.00940034
HORVU2Hr1G023260	4813.1	2.18136	0.0529845	41.1698	0	0
HORVU2Hr1G023430	64.6391	-1.49011	0.324517	-4.59178	4.39478e-06	1.98456e-05
HORVU2Hr1G024030	2.28694	4.72163	1.68942	2.79482	0.00519279	0.0143584
HORVU2Hr1G024160	388.178	2.99776	0.122363	24.4989	1.51609e-132	8.96316e-131
HORVU2Hr1G024280	24.2946	4.23139	0.639532	6.61639	3.68066e-11	2.5759e-10
HORVU2Hr1G024300	32.5528	2.42475	0.372792	6.50431	7.80522e-11	5.33172e-10
HORVU2Hr1G024480	191.476	2.22215	0.1556	14.2812	2.86786e-46	6.33175e-45
HORVU2Hr1G024940	7.90776	-1.77831	0.72628	-2.44852	0.0143443	0.0356501
HORVU2Hr1G025020	406.58	1.53121	0.103907	14.7363	3.76803e-49	8.7364e-48
HORVU2Hr1G025150	20.2904	2.11718	0.524077	4.03983	5.34895e-05	0.000208792
HORVU2Hr1G025400	31.411	-1.39258	0.388866	-3.58113	0.000342114	0.00118654
HORVU2Hr1G025410	417.511	1.10723	0.107931	10.2587	1.08165e-24	1.42307e-23
HORVU2Hr1G025450	22.9575	2.79036	0.53688	5.19736	2.02136e-07	1.04907e-06
HORVU2Hr1G025630	13.1755	-1.38425	0.591315	-2.34097	0.0192339	0.046175
HORVU2Hr1G027080	1339.46	2.34215	0.0645332	36.2937	2.03545e-288	3.85667e-286
HORVU2Hr1G027480	100.427	-3.11777	0.309515	-10.0731	7.2659e-24	9.30518e-23
HORVU2Hr1G028320	3.42768	5.17835	1.45708	3.55391	0.000379545	0.00130637
HORVU2Hr1G028330	1478.72	3.58235	0.08765	40.8711	0	0
HORVU2Hr1G028590	8.46803	-4.18772	1.14395	-3.66075	0.00025148	0.000889824
HORVU2Hr1G028760	29.9198	2.75882	0.405853	6.79758	1.06389e-11	7.72148e-11
HORVU2Hr1G028780	5005.18	3.05752	0.0675973	45.2313	0	0
HORVU2Hr1G029450	227.156	6.67302	0.382375	17.4515	3.35105e-68	1.026e-66
HORVU2Hr1G029460	561.422	5.73473	0.192295	29.8226	1.98792e-195	1.94715e-193
HORVU2Hr1G029490	23.7501	1.65738	0.440447	3.76295	0.000167924	0.000608899
HORVU2Hr1G029560	148.211	1.29415	0.208474	6.20774	5.37529e-10	3.48249e-09
HORVU2Hr1G029600	307.229	1.51069	0.121502	12.4334	1.72131e-35	3.02815e-34
HORVU2Hr1G029840	301.037	-1.17692	0.111254	-10.5787	3.74121e-26	5.13246e-25
HORVU2Hr1G029900	3037.21	2.18495	0.0556516	39.2613	0	0
HORVU2Hr1G030030	54.9435	1.82929	0.247462	7.39222	1.44398e-13	1.16996e-12
HORVU2Hr1G030190	82.5619	2.72574	0.262598	10.3799	3.06144e-25	4.08122e-24
HORVU2Hr1G030690	221.936	-1.01839	0.133507	-7.628	2.38429e-14	2.02928e-13
HORVU2Hr1G030810	53.6943	2.49897	0.324714	7.69591	1.40496e-14	1.20867e-13
HORVU2Hr1G030950	2777.38	-1.21559	0.0570121	-21.3217	7.14767e-101	3.19585e-99
HORVU2Hr1G031310	4011.78	1.38871	0.0443451	31.3159	2.83113e-215	3.27222e-213
HORVU2Hr1G031410	143.554	2.77615	0.216165	12.8428	9.44389e-38	1.74504e-36
HORVU2Hr1G031460	287.513	3.14291	0.153834	20.4305	8.95202e-93	3.63044e-91
HORVU2Hr1G031490	236.298	3.86747	0.169117	22.8687	9.52737e-116	4.88325e-114
HORVU2Hr1G031500	1545.17	3.81086	0.0885675	43.0278	0	0
HORVU2Hr1G032360	974.577	1.89886	0.0854999	22.2089	2.8181e-109	1.36283e-107
HORVU2Hr1G032780	203.213	3.10063	0.163795	18.9299	6.46544e-80	2.29931e-78
HORVU2Hr1G032970	8462.38	-1.04211	0.0352982	-29.5229	1.46276e-191	1.36344e-189
HORVU2Hr1G033610	35.7114	1.99925	0.420601	4.75332	2.00104e-06	9.37875e-06
HORVU2Hr1G033620	117.901	1.21666	0.224322	5.42374	5.83664e-08	3.20779e-07
HORVU2Hr1G034280	72.5703	-2.20282	0.235904	-9.33779	9.8366e-21	1.12011e-19
HORVU2Hr1G034370	121.692	1.30451	0.194096	6.72098	1.80507e-11	1.29262e-10
HORVU2Hr1G034860	9.04267	1.75687	0.660592	2.65954	0.00782479	0.020793
HORVU2Hr1G035060	47.7841	-1.59843	0.300386	-5.32127	1.03045e-07	5.5305e-07
HORVU2Hr1G035170	65.0058	-1.36946	0.258595	-5.29579	1.18505e-07	6.29018e-07
HORVU2Hr1G036000	1697.15	1.49566	0.0753266	19.8557	9.83835e-88	3.80944e-86
HORVU2Hr1G036050	765.251	1.34167	0.0751589	17.8511	2.83506e-71	9.20439e-70
HORVU2Hr1G036210	57.7725	1.58854	0.299772	5.29916	1.16335e-07	6.18441e-07
HORVU2Hr1G036280	2620.44	1.92476	0.0614072	31.3441	1.17042e-215	1.35957e-213
HORVU2Hr1G036520	13.9167	-2.52573	0.685094	-3.68669	0.000227186	0.000808565
HORVU2Hr1G036590	4878.99	3.17455	0.0569951	55.6987	0	0
HORVU2Hr1G036780	1438.69	1.54157	0.0612404	25.1724	8.02733e-140	5.04238e-138
HORVU2Hr1G037040	5.01688	-5.2347	1.46366	-3.57645	0.000348287	0.00120542
HORVU2Hr1G037100	10.7158	2.77874	0.615725	4.51296	6.39294e-06	2.83537e-05
HORVU2Hr1G037200	288.569	1.60951	0.124605	12.9168	3.617e-38	6.73193e-37
HORVU2Hr1G037210	119.75	3.06552	0.222893	13.7533	4.86631e-43	9.99907e-42
HORVU2Hr1G037540	15.5091	3.06051	0.640749	4.77646	1.78412e-06	8.40294e-06
HORVU2Hr1G037550	61.0081	-1.19411	0.298071	-4.00612	6.17239e-05	0.000238278
HORVU2Hr1G037620	14.2706	2.08018	0.627527	3.31489	0.00091679	0.00296233
HORVU2Hr1G037750	581.588	1.00688	0.0866031	11.6264	3.02671e-31	4.79543e-30
HORVU2Hr1G038040	16.5669	-1.35499	0.582465	-2.3263	0.0200028	0.0478065
HORVU2Hr1G038120	266.668	1.29625	0.155121	8.35641	6.46559e-17	6.20418e-16
HORVU2Hr1G038140	366.712	3.17096	0.145532	21.7887	2.96908e-105	1.38934e-103
HORVU2Hr1G038760	246.605	1.25839	0.12824	9.81278	9.91927e-23	1.22486e-21
HORVU2Hr1G038940	18363.5	1.89266	0.0674462	28.0618	2.86832e-173	2.368e-171
HORVU2Hr1G038960	71.2829	2.49831	0.28274	8.83606	9.91518e-19	1.03757e-17
HORVU2Hr1G039030	1874.98	2.50371	0.0764572	32.7466	3.39185e-235	4.66703e-233
HORVU2Hr1G039070	1856.9	1.96115	0.0543583	36.0782	4.98829e-285	9.29913e-283
HORVU2Hr1G039360	12.6511	3.19429	0.908815	3.51478	0.000440113	0.00149943
HORVU2Hr1G040130	19.0292	-2.6058	0.639426	-4.07521	4.59724e-05	0.00018107
HORVU2Hr1G040790	36.1792	-1.30648	0.383588	-3.40594	0.000659369	0.00218585
HORVU2Hr1G040800	85.2017	-1.20252	0.241429	-4.98083	6.3313e-07	3.12924e-06
HORVU2Hr1G040830	48.3988	1.43107	0.311268	4.59753	4.2752e-06	1.93434e-05
HORVU2Hr1G040880	27.4464	2.00578	0.368268	5.44652	5.1365e-08	2.8392e-07
HORVU2Hr1G041080	150.36	1.43154	0.196514	7.28465	3.22504e-13	2.55483e-12
HORVU2Hr1G041180	13.9141	-1.86138	0.572821	-3.2495	0.00115607	0.0036663
HORVU2Hr1G042210	175.411	2.35557	0.177293	13.2863	2.77883e-40	5.37086e-39
HORVU2Hr1G042520	79.8123	3.25967	0.267455	12.1878	3.61237e-34	6.17174e-33
HORVU2Hr1G042550	55.7111	1.74478	0.26287	6.63741	3.19233e-11	2.24229e-10
HORVU2Hr1G043780	1067.1	2.18684	0.0736831	29.679	1.43148e-193	1.36173e-191
HORVU2Hr1G043900	1970.78	2.42661	0.0687234	35.3098	4.15153e-273	7.05638e-271
HORVU2Hr1G044270	96.5784	1.66802	0.247454	6.74072	1.576e-11	1.13104e-10
HORVU2Hr1G044440	101.943	3.45198	0.221292	15.5992	7.37423e-55	1.87734e-53
HORVU2Hr1G044450	569.061	3.21777	0.114558	28.0887	1.34543e-173	1.11473e-171
HORVU2Hr1G044460	9.31152	-2.80394	0.961412	-2.91648	0.00354	0.0101188
HORVU2Hr1G044520	403.988	1.26113	0.117177	10.7626	5.16676e-27	7.26489e-26
HORVU2Hr1G044600	35.751	1.81381	0.396884	4.57012	4.87452e-06	2.1922e-05
HORVU2Hr1G044640	44.3684	2.47041	0.344525	7.17048	7.47349e-13	5.80892e-12
HORVU2Hr1G044650	1048	1.97295	0.0948638	20.7977	4.54412e-96	1.92033e-94
HORVU2Hr1G044680	420.438	2.0207	0.11938	16.9266	2.86411e-64	8.44473e-63
HORVU2Hr1G044870	312.582	1.84262	0.125663	14.6631	1.11002e-48	2.54556e-47
HORVU2Hr1G044910	761.017	1.4615	0.0774686	18.8657	2.18375e-79	7.68333e-78
HORVU2Hr1G044940	61.862	3.90212	0.360383	10.8277	2.54438e-27	3.60613e-26
HORVU2Hr1G045340	56.3064	-3.20477	0.4251	-7.53888	4.74039e-14	3.96307e-13
HORVU2Hr1G045350	19.2079	2.34675	0.52344	4.48332	7.34912e-06	3.23462e-05
HORVU2Hr1G045580	3.85556	3.45418	1.35127	2.55625	0.0105807	0.0271729
HORVU2Hr1G045970	96.3852	-1.26608	0.18917	-6.69278	2.18964e-11	1.55837e-10
HORVU2Hr1G046420	31.5224	1.22799	0.361987	3.39236	0.00069294	0.0022873
HORVU2Hr1G046550	444.293	-1.35901	0.0981196	-13.8506	1.26229e-43	2.63588e-42
HORVU2Hr1G046590	234.388	1.41076	0.137596	10.2529	1.14846e-24	1.5084e-23
HORVU2Hr1G046600	7.77583	4.52152	0.920597	4.91151	9.03783e-07	4.39828e-06
HORVU2Hr1G047750	119.597	1.44666	0.217132	6.66259	2.69049e-11	1.90485e-10
HORVU2Hr1G048520	152.048	1.28339	0.163363	7.85604	3.96454e-15	3.49521e-14
HORVU2Hr1G048590	94.9548	1.20631	0.225453	5.35059	8.76694e-08	4.72944e-07
HORVU2Hr1G048950	63.3381	1.00005	0.258938	3.86211	0.000112413	0.000417301
HORVU2Hr1G051540	10.5341	2.22166	0.54534	4.0739	4.62318e-05	0.00018206
HORVU2Hr1G052920	8.5287	3.26117	0.776282	4.20101	2.65731e-05	0.000108412
ENSRNA049483506	19.2012	2.10489	0.680436	3.09345	0.00197845	0.00597673
HORVU2Hr1G059780	857.068	-1.32452	0.0762719	-17.3658	1.49841e-67	4.56354e-66
HORVU2Hr1G060350	5963.43	1.39994	0.0358863	39.0104	0	0
HORVU2Hr1G061800	2.0816	4.03046	1.69134	2.38299	0.0171727	0.0417592
HORVU2Hr1G061850	14.6393	4.49335	0.767341	5.85574	4.74885e-09	2.85871e-08
HORVU2Hr1G061920	20.3619	1.28248	0.479043	2.67717	0.00742464	0.019823
HORVU2Hr1G062280	11.2865	3.07581	1.27571	2.41106	0.0159063	0.0390205
ENSRNA050017055	22.3588	4.1777	1.56735	2.66546	0.00768832	0.0204515
HORVU2Hr1G062290	9.43332	2.68499	0.952167	2.81987	0.00480432	0.01339
HORVU2Hr1G062700	441.477	1.61353	0.10148	15.9	6.33689e-57	1.64959e-55
HORVU2Hr1G062780	56.3945	-1.04236	0.280098	-3.7214	0.000198122	0.000710487
HORVU2Hr1G063220	24.0201	-3.94534	0.594395	-6.63757	3.18896e-11	2.24061e-10
HORVU2Hr1G063480	68.2818	1.46092	0.301669	4.8428	1.28024e-06	6.12839e-06
HORVU2Hr1G063510	17.327	1.3205	0.480283	2.74941	0.00597021	0.0162764
HORVU2Hr1G063620	137.406	1.87528	0.182298	10.2869	8.07638e-25	1.06439e-23
HORVU2Hr1G063690	96.6914	2.75958	0.249501	11.0604	1.95206e-28	2.86865e-27
HORVU2Hr1G064150	1282.1	2.93927	0.0656303	44.7853	0	0
HORVU2Hr1G064160	1234.18	2.96241	0.0938467	31.5665	1.0643e-218	1.25523e-216
HORVU2Hr1G065000	134.977	1.15576	0.183774	6.28903	3.19466e-10	2.10153e-09
HORVU2Hr1G065090	63.1399	1.14652	0.296603	3.86551	0.000110858	0.000412059
HORVU2Hr1G065750	673.763	2.39737	0.0938707	25.539	7.26841e-144	4.73286e-142
HORVU2Hr1G066000	114.298	1.03019	0.185951	5.54014	3.0223e-08	1.70899e-07
HORVU2Hr1G066080	19.985	-1.25118	0.401015	-3.12003	0.0018083	0.00550733
HORVU2Hr1G066100	152.107	1.72398	0.238089	7.24091	4.45692e-13	3.50787e-12
HORVU2Hr1G066280	40.3237	3.1472	0.415286	7.5784	3.49847e-14	2.94933e-13
HORVU2Hr1G066950	189.115	1.10807	0.202247	5.47877	4.28284e-08	2.3833e-07
HORVU2Hr1G067340	163.038	2.27579	0.194049	11.7279	9.16853e-32	1.48106e-30
HORVU2Hr1G067350	423.463	2.66665	0.150274	17.7453	1.87407e-70	6.00014e-69
HORVU2Hr1G068200	2833.69	1.39959	0.0756084	18.511	1.68314e-76	5.75554e-75
HORVU2Hr1G068630	642.037	1.12115	0.101443	11.052	2.14274e-28	3.13889e-27
HORVU2Hr1G068780	11.603	2.91483	0.698131	4.17519	2.97734e-05	0.000120681
HORVU2Hr1G068960	10.4699	-2.66975	0.554428	-4.81532	1.46966e-06	6.98164e-06
HORVU2Hr1G068980	61.2165	-1.01484	0.265976	-3.81554	0.000135885	0.000499941
HORVU2Hr1G069440	738.18	2.09012	0.100584	20.7798	6.58868e-96	2.77927e-94
HORVU2Hr1G070310	59.1225	2.01405	0.295757	6.8098	9.77339e-12	7.12237e-11
HORVU2Hr1G070320	175.149	1.08907	0.172807	6.30223	2.93395e-10	1.93554e-09
HORVU2Hr1G070410	12.91	2.39616	0.705607	3.39589	0.000684056	0.00226112
HORVU2Hr1G070570	3.44229	4.48719	1.47861	3.03474	0.00240741	0.00714007
HORVU2Hr1G070700	24.1068	-2.05782	0.484286	-4.24919	2.14547e-05	8.86886e-05
HORVU2Hr1G070720	730.797	1.09587	0.0860395	12.7368	3.69166e-37	6.73e-36
HORVU2Hr1G070880	102.15	-1.51768	0.24297	-6.24639	4.2006e-10	2.73756e-09
HORVU2Hr1G071270	38.9602	-1.48939	0.418286	-3.5607	0.000369873	0.0012744
HORVU2Hr1G071570	328.271	-1.72711	0.141988	-12.1638	4.84676e-34	8.24413e-33
HORVU2Hr1G072120	844.935	1.31144	0.0772529	16.9759	1.23906e-64	3.66735e-63
HORVU2Hr1G072150	1075.76	1.58772	0.0980188	16.1981	5.19957e-59	1.40577e-57
HORVU2Hr1G072210	1261.51	1.43302	0.0980794	14.6108	2.39599e-48	5.4729e-47
HORVU2Hr1G072670	107.963	-1.10453	0.16661	-6.62941	3.3703e-11	2.36371e-10
HORVU2Hr1G072850	341.249	-1.1242	0.10871	-10.3413	4.58418e-25	6.08312e-24
HORVU2Hr1G072960	23.1274	2.23157	0.644567	3.46212	0.000535941	0.00180099
HORVU2Hr1G073210	12.3328	-2.52697	0.659392	-3.83227	0.000126969	0.000468253
HORVU2Hr1G073310	12.1775	1.83089	0.581453	3.14882	0.00163931	0.00503848
HORVU2Hr1G073360	26.0333	-1.1862	0.418082	-2.83725	0.00455042	0.0127536
HORVU2Hr1G074130	1234.56	2.25498	0.0693959	32.4945	1.27564e-231	1.68501e-229
HORVU2Hr1G074590	26.6155	-1.60305	0.467204	-3.43117	0.000600986	0.00200381
HORVU2Hr1G075220	39.5576	1.58813	0.327291	4.85234	1.22011e-06	5.85752e-06
HORVU2Hr1G075610	43.6387	1.41765	0.315367	4.49524	6.94927e-06	3.07032e-05
HORVU2Hr1G075970	572.854	1.07242	0.0839559	12.7736	2.30112e-37	4.2183e-36
HORVU2Hr1G076320	1528.91	1.53559	0.0932397	16.4693	6.09761e-61	1.70851e-59
HORVU2Hr1G076470	23.8844	2.21612	0.37609	5.89252	3.80339e-09	2.3088e-08
HORVU2Hr1G076490	8.53611	3.05459	0.800916	3.81387	0.000136807	0.00050301
HORVU2Hr1G076720	46.5294	3.23001	0.359848	8.97605	2.80667e-19	3.0289e-18
HORVU2Hr1G076970	1000.23	2.73277	0.087332	31.2917	6.04953e-215	6.95726e-213
HORVU2Hr1G077460	1314.78	-1.13516	0.0700456	-16.2061	4.56931e-59	1.23682e-57
HORVU2Hr1G078380	20.9072	2.51435	0.466466	5.39021	7.03755e-08	3.83408e-07
HORVU2Hr1G078510	937.933	1.10809	0.086	12.8848	5.48263e-38	1.01796e-36
HORVU2Hr1G078960	829.683	2.353	0.10026	23.4691	8.43279e-122	4.56516e-120
HORVU2Hr1G079020	489.885	1.51712	0.108857	13.9368	3.78295e-44	8.00795e-43
HORVU2Hr1G079170	277.69	1.6079	0.126984	12.6622	9.57167e-37	1.72858e-35
HORVU2Hr1G079180	770.026	-2.18887	0.101113	-21.6479	6.36414e-104	2.93055e-102
HORVU2Hr1G079510	124.853	1.74527	0.181051	9.63969	5.43513e-22	6.52667e-21
HORVU2Hr1G079520	32.2466	1.53484	0.337718	4.54474	5.50043e-06	2.46124e-05
HORVU2Hr1G079580	79.2656	-1.32535	0.280244	-4.72927	2.25331e-06	1.04973e-05
HORVU2Hr1G080020	1806.75	1.01282	0.0491457	20.6085	2.30262e-94	9.52188e-93
HORVU2Hr1G080140	1443.64	1.2992	0.067633	19.2095	3.07936e-82	1.1263e-80
HORVU2Hr1G080190	3.74231	3.63716	1.48067	2.45642	0.0140327	0.0349775
HORVU2Hr1G080430	55.9442	1.25289	0.261753	4.78654	1.6968e-06	8.00638e-06
HORVU2Hr1G080440	160.295	1.35282	0.168824	8.01321	1.11749e-15	1.01302e-14
HORVU2Hr1G081510	37.749	2.86981	0.382166	7.50934	5.94268e-14	4.93963e-13
HORVU2Hr1G081540	86.9159	2.69719	0.269853	9.99503	1.60243e-23	2.02414e-22
HORVU2Hr1G081560	26.9532	4.53601	0.580309	7.81656	5.42886e-15	4.76256e-14
HORVU2Hr1G081590	475.066	7.04231	0.222876	31.5974	4.00418e-219	4.7467e-217
HORVU2Hr1G081600	55.6944	8.31917	1.19609	6.95533	3.51736e-12	2.63557e-11
HORVU2Hr1G081640	66.8298	7.48629	1.03784	7.21333	5.46014e-13	4.28143e-12
HORVU2Hr1G081650	2.92572	-3.21515	1.34222	-2.3954	0.0166021	0.0405209
HORVU2Hr1G082010	5.08678	4.17779	1.26423	3.30461	0.000951089	0.0030616
HORVU2Hr1G082030	10.4904	-2.85451	0.654265	-4.36292	1.28336e-05	5.47674e-05
HORVU2Hr1G082170	16.5471	2.61981	0.657287	3.98579	6.72555e-05	0.000258338
HORVU2Hr1G082200	12.2327	-1.7325	0.579473	-2.98978	0.00279177	0.00816235
HORVU2Hr1G082220	35.129	-1.63011	0.405396	-4.02102	5.79469e-05	0.000224937
HORVU2Hr1G082330	24.7133	-1.39181	0.345528	-4.02808	5.62352e-05	0.000218623
HORVU2Hr1G082370	24.3323	1.10639	0.410137	2.6976	0.00698404	0.0187463
HORVU2Hr1G082420	1619.01	-1.79337	0.0755175	-23.7477	1.15965e-124	6.39773e-123
HORVU2Hr1G082440	382.76	-1.84463	0.166709	-11.065	1.85541e-28	2.73182e-27
HORVU2Hr1G082480	26.1808	-3.64756	0.713657	-5.11108	3.20317e-07	1.63381e-06
HORVU2Hr1G082700	91.6663	-2.916	0.370336	-7.87393	3.43681e-15	3.04038e-14
HORVU2Hr1G082740	97.6894	-1.23321	0.261749	-4.71145	2.45966e-06	1.14218e-05
HORVU2Hr1G083020	18.8692	-1.52648	0.609781	-2.50332	0.0123033	0.0310924
HORVU2Hr1G083090	14.3396	7.02274	1.24984	5.61891	1.92164e-08	1.10143e-07
HORVU2Hr1G083150	13.624	1.31002	0.499134	2.62459	0.00867531	0.0227807
HORVU2Hr1G083430	218.755	-1.89012	0.148628	-12.7171	4.74901e-37	8.63714e-36
HORVU2Hr1G083490	228.367	-1.7155	0.167414	-10.247	1.22059e-24	1.60222e-23
HORVU2Hr1G083560	18.3754	1.22862	0.523119	2.34865	0.0188418	0.0453459
HORVU2Hr1G083570	94.7269	2.24261	0.278251	8.05968	7.64959e-16	7.00031e-15
HORVU2Hr1G084210	448.451	2.96604	0.124524	23.819	2.12297e-125	1.18538e-123
HORVU2Hr1G084260	985.115	1.32014	0.0722303	18.2768	1.26566e-74	4.24015e-73
HORVU2Hr1G084730	2734.49	1.81096	0.0592742	30.5523	5.27252e-205	5.69531e-203
HORVU2Hr1G084740	794.887	1.35315	0.0825641	16.3891	2.28633e-60	6.35227e-59
HORVU2Hr1G084890	130.849	1.4802	0.19729	7.50268	6.25244e-14	5.1915e-13
HORVU2Hr1G084910	61.3154	1.13828	0.257322	4.42358	9.70797e-06	4.20321e-05
HORVU2Hr1G085260	49.8695	3.30735	0.366188	9.03184	1.68804e-19	1.83714e-18
HORVU2Hr1G085270	627.937	2.66156	0.14407	18.4741	3.33525e-76	1.13546e-74
HORVU2Hr1G085340	9.47011	4.16771	1.1552	3.60778	0.000308831	0.00108035
HORVU2Hr1G085560	16.6498	-1.6965	0.542482	-3.12729	0.00176423	0.00538447
HORVU2Hr1G085570	59.1712	-2.1276	0.323148	-6.58397	4.58052e-11	3.1835e-10
HORVU2Hr1G086050	2.00916	-4.37726	1.83334	-2.38758	0.0169596	0.0412976
HORVU2Hr1G086900	124.631	1.03923	0.188401	5.51606	3.46692e-08	1.94707e-07
HORVU2Hr1G087030	1711.42	1.21806	0.0717411	16.9786	1.18288e-64	3.50557e-63
HORVU2Hr1G087280	10.195	6.85756	1.2744	5.381	7.40721e-08	4.02409e-07
HORVU2Hr1G087580	184.207	-1.04414	0.141976	-7.3543	1.91928e-13	1.5437e-12
HORVU2Hr1G088400	18.9101	-1.47839	0.489764	-3.01858	0.00253963	0.00749279
HORVU2Hr1G088550	25.0593	-2.1893	0.456575	-4.79504	1.62645e-06	7.69014e-06
HORVU2Hr1G088640	266.109	-3.34066	0.25053	-13.3344	1.4608e-40	2.83526e-39
HORVU2Hr1G088660	7.11403	-4.11394	1.33249	-3.08742	0.00201902	0.00608496
HORVU2Hr1G089020	1366.63	3.2202	0.0998025	32.2657	2.11952e-228	2.73714e-226
HORVU2Hr1G089130	81.6609	1.04549	0.249576	4.18907	2.801e-05	0.000113973
HORVU2Hr1G089340	251.338	-1.71098	0.139397	-12.2742	1.24617e-34	2.15456e-33
HORVU2Hr1G089350	37.8598	-1.92601	0.351945	-5.47247	4.43804e-08	2.46907e-07
HORVU2Hr1G089440	2476.56	2.47088	0.0668963	36.9359	1.2258e-298	2.36129e-296
HORVU2Hr1G089670	83.0315	1.28677	0.226076	5.69176	1.25734e-08	7.31368e-08
HORVU2Hr1G090150	10.2379	1.41864	0.58877	2.40949	0.0159746	0.0391759
HORVU2Hr1G090160	23.7917	1.76147	0.444065	3.96669	7.28767e-05	0.000278864
HORVU2Hr1G090170	58.4899	2.51072	0.308356	8.14228	3.87914e-16	3.594e-15
HORVU2Hr1G090200	85.3255	2.59793	0.246595	10.5352	5.94549e-26	8.07496e-25
HORVU2Hr1G090280	117.689	2.81424	0.233185	12.0687	1.54633e-33	2.60152e-32
HORVU2Hr1G090310	786.259	1.84719	0.080087	23.0648	1.04528e-117	5.50405e-116
HORVU2Hr1G090410	46.1613	-1.03014	0.321265	-3.2065	0.0013436	0.00420221
HORVU2Hr1G090670	9.83095	-2.71598	0.756341	-3.59095	0.000329472	0.00114545
HORVU2Hr1G090970	19.1594	1.32736	0.525365	2.52655	0.0115189	0.0293219
HORVU2Hr1G091060	4.57648	-2.81569	1.18094	-2.38428	0.0171128	0.0416223
HORVU2Hr1G091130	11.4788	1.74458	0.548619	3.17994	0.00147305	0.00457059
HORVU2Hr1G091190	253.321	2.07656	0.144153	14.4052	4.79614e-47	1.07534e-45
HORVU2Hr1G091280	345.894	1.48314	0.123516	12.0077	3.23918e-33	5.418e-32
HORVU2Hr1G091720	489.391	1.25186	0.110777	11.3007	1.30162e-29	1.97949e-28
HORVU2Hr1G092360	1.79398	5.159	1.78659	2.88763	0.00388157	0.0110283
HORVU2Hr1G092460	144.314	-1.62981	0.189569	-8.59746	8.1502e-18	8.18418e-17
HORVU2Hr1G092650	7.51086	3.26485	1.00595	3.24554	0.00117229	0.00371417
HORVU2Hr1G092710	788.393	3.53001	0.10826	32.6069	3.27492e-233	4.42709e-231
HORVU2Hr1G092810	140.642	2.10727	0.205854	10.2367	1.35794e-24	1.77848e-23
HORVU2Hr1G093190	11.6747	-1.68673	0.61198	-2.75618	0.00584807	0.0159811
HORVU2Hr1G093670	695.593	-3.73478	0.140815	-26.5227	5.30521e-155	3.73888e-153
HORVU2Hr1G093700	1055.13	-3.69767	0.111691	-33.1063	2.41033e-240	3.46069e-238
HORVU2Hr1G094020	59.0278	1.65256	0.291044	5.67803	1.36254e-08	7.90374e-08
HORVU2Hr1G094040	321.389	1.10509	0.113302	9.75352	1.78186e-22	2.18049e-21
HORVU2Hr1G094090	205.521	2.11292	0.148479	14.2304	5.93275e-46	1.30363e-44
HORVU2Hr1G094230	57.3726	2.41375	0.305514	7.9006	2.77566e-15	2.46872e-14
HORVU2Hr1G094780	11.7134	7.46159	1.28312	5.81521	6.05562e-09	3.60592e-08
HORVU2Hr1G094810	2.06661	4.43252	1.84545	2.40186	0.0163121	0.0399016
HORVU2Hr1G094840	63.7299	1.30749	0.270944	4.82567	1.39531e-06	6.64345e-06
HORVU2Hr1G094870	615.889	4.61964	0.133765	34.5354	2.36298e-261	3.71582e-259
HORVU2Hr1G095160	176.821	1.13268	0.149295	7.5869	3.27647e-14	2.76824e-13
HORVU2Hr1G095170	213.288	1.79245	0.13944	12.8547	8.09495e-38	1.50058e-36
HORVU2Hr1G095340	20.8989	1.19743	0.484486	2.47154	0.0134533	0.0336747
HORVU2Hr1G095460	38.2256	-8.39597	1.2088	-6.94572	3.76531e-12	2.81133e-11
HORVU2Hr1G095750	45.1168	-1.02864	0.332131	-3.09709	0.00195431	0.00591152
HORVU2Hr1G095970	28.8293	2.48541	0.425209	5.84515	5.06117e-09	3.0388e-08
HORVU2Hr1G095990	982.708	-1.10995	0.101655	-10.9188	9.37155e-28	1.34638e-26
HORVU2Hr1G096510	161.732	2.02436	0.201678	10.0376	1.04195e-23	1.32704e-22
HORVU2Hr1G097150	56.7293	1.26263	0.308059	4.09865	4.15559e-05	0.000164572
HORVU2Hr1G097410	24.8242	2.23973	0.397655	5.63233	1.77786e-08	1.02206e-07
HORVU2Hr1G097450	10.2266	3.86016	0.818604	4.71554	2.41068e-06	1.12011e-05
HORVU2Hr1G097460	10.8187	5.33311	1.12676	4.73312	2.211e-06	1.03062e-05
HORVU2Hr1G098390	3192.85	-1.08147	0.0623905	-17.3339	2.61232e-67	7.93515e-66
HORVU2Hr1G098650	654.681	1.53675	0.113785	13.5058	1.44583e-41	2.85412e-40
HORVU2Hr1G098680	444.359	1.34263	0.0964111	13.926	4.40029e-44	9.29772e-43
HORVU2Hr1G098980	81.8544	2.80249	0.246609	11.3641	6.31046e-30	9.64766e-29
HORVU2Hr1G099020	10.0924	2.73748	0.656973	4.1668	3.08899e-05	0.000124902
HORVU2Hr1G099290	27.8649	-3.48562	0.580041	-6.00927	1.8636e-09	1.15897e-08
HORVU2Hr1G099470	87.1325	-2.38529	0.299248	-7.97095	1.57456e-15	1.4124e-14
HORVU2Hr1G099530	319.451	2.06963	0.142041	14.5706	4.31867e-48	9.81616e-47
HORVU2Hr1G099640	441.296	2.47529	0.13117	18.8709	1.97842e-79	6.97152e-78
HORVU2Hr1G099890	1882.3	3.64448	0.0946398	38.5089	0	0
HORVU2Hr1G100100	3207.59	1.10455	0.04009	27.5517	4.21684e-167	3.2277e-165
HORVU2Hr1G100450	172.159	2.25114	0.164255	13.7051	9.46239e-43	1.92546e-41
HORVU2Hr1G100480	249.756	1.08491	0.129998	8.34562	7.08395e-17	6.78064e-16
HORVU2Hr1G100870	17.0891	1.26448	0.50762	2.491	0.0127383	0.0320866
HORVU2Hr1G101100	1158.74	1.89302	0.107261	17.6487	1.04037e-69	3.27647e-68
HORVU2Hr1G101160	25.4704	2.61143	0.439731	5.93869	2.8731e-09	1.76307e-08
HORVU2Hr1G101340	24.9294	3.02267	0.411967	7.33717	2.18154e-13	1.74856e-12
HORVU2Hr1G101470	83.2751	-1.17595	0.230312	-5.1059	3.29222e-07	1.67645e-06
HORVU2Hr1G101520	14.4237	-1.69235	0.590394	-2.86647	0.00415073	0.0117253
HORVU2Hr1G101920	203.475	2.48334	0.203372	12.2108	2.72047e-34	4.6617e-33
HORVU2Hr1G102100	55.7613	-2.44166	0.376179	-6.4907	8.5441e-11	5.8244e-10
HORVU2Hr1G102580	179.647	1.71786	0.199829	8.59664	8.20841e-18	8.23906e-17
HORVU2Hr1G102790	199.561	1.80238	0.158087	11.4012	4.12592e-30	6.3372e-29
HORVU2Hr1G102960	35.5845	1.92788	0.342265	5.63271	1.774e-08	1.0201e-07
HORVU2Hr1G103000	5.50424	-4.9748	1.45134	-3.42774	0.00060863	0.00202754
HORVU2Hr1G103150	57.1055	2.89494	0.490308	5.90433	3.54085e-09	2.15736e-08
HORVU2Hr1G103310	3932.05	1.44613	0.0424963	34.0296	8.12249e-254	1.24344e-251
HORVU2Hr1G103490	561.13	1.06375	0.125676	8.46419	2.57942e-17	2.52225e-16
HORVU2Hr1G103780	14.6941	1.65247	0.557451	2.96434	0.00303333	0.00879962
HORVU2Hr1G103890	1091.17	1.25037	0.0752006	16.6272	4.42945e-62	1.26722e-60
HORVU2Hr1G103930	94.9366	1.25	0.204604	6.10934	1.00043e-09	6.35327e-09
HORVU2Hr1G104110	1055.1	1.37171	0.067943	20.1891	1.21993e-90	4.82874e-89
HORVU2Hr1G104580	46.91	-1.86037	0.359976	-5.16804	2.36556e-07	1.22086e-06
HORVU2Hr1G104690	40.1031	-1.26886	0.363996	-3.48593	0.000490433	0.00165865
HORVU2Hr1G104800	1.54737	4.28355	1.73211	2.47303	0.0133975	0.0335532
HORVU2Hr1G104860	214.194	-1.95603	0.185074	-10.5689	4.15152e-26	5.67513e-25
HORVU2Hr1G104930	148.2	1.04052	0.152791	6.8101	9.75331e-12	7.10998e-11
HORVU2Hr1G104950	6.25581	5.11465	1.40943	3.62889	0.000284643	0.00100088
HORVU2Hr1G104960	328.538	1.29915	0.123114	10.5524	4.95058e-26	6.74749e-25
HORVU2Hr1G104980	31.152	1.59774	0.352106	4.53767	5.68804e-06	2.54077e-05
HORVU2Hr1G105100	1075.24	1.01663	0.0959514	10.5953	3.13501e-26	4.31105e-25
HORVU2Hr1G105190	1008.69	4.71733	0.115797	40.7381	0	0
HORVU2Hr1G105320	4.00332	4.27678	1.44369	2.9624	0.0030525	0.00885118
HORVU2Hr1G105720	19.7469	1.85455	0.471257	3.93532	8.30844e-05	0.000315159
HORVU2Hr1G106100	1741.41	-1.12599	0.0553752	-20.3339	6.44833e-92	2.58336e-90
HORVU2Hr1G106240	112.142	1.46668	0.197691	7.41902	1.17987e-13	9.65107e-13
HORVU2Hr1G106300	65.7752	2.50312	0.298172	8.39489	4.6635e-17	4.5143e-16
HORVU2Hr1G106380	129.028	1.1576	0.198865	5.82103	5.84862e-09	3.48805e-08
HORVU2Hr1G106400	30.041	1.06278	0.339065	3.13446	0.00172173	0.00526865
HORVU2Hr1G107100	488.147	-2.47163	0.127582	-19.3728	1.30939e-83	4.85061e-82
HORVU2Hr1G107140	2.32383	4.87881	1.54599	3.15578	0.00160072	0.004931
HORVU2Hr1G107150	29.0622	2.01504	0.447078	4.50714	6.57078e-06	2.90922e-05
HORVU2Hr1G107180	389.271	1.1232	0.114024	9.85059	6.81418e-23	8.45045e-22
HORVU2Hr1G107220	34.61	2.21446	0.412318	5.37075	7.84089e-08	4.24871e-07
HORVU2Hr1G107250	1351.12	2.17821	0.0951688	22.8878	6.14074e-116	3.16851e-114
HORVU2Hr1G107260	21.3159	3.35052	0.574071	5.83642	5.33335e-09	3.19558e-08
HORVU2Hr1G107270	53.8657	4.08805	0.429812	9.51125	1.88391e-21	2.21282e-20
HORVU2Hr1G107410	37.9179	9.81806	1.21667	8.06961	7.05226e-16	6.46648e-15
HORVU2Hr1G107630	46.2737	-1.15314	0.337769	-3.414	0.00064016	0.00212675
HORVU2Hr1G107750	18.0812	1.69348	0.511962	3.30782	0.000940239	0.00303132
HORVU2Hr1G107830	2950.76	-1.20521	0.0737463	-16.3427	4.90245e-60	1.35394e-58
HORVU2Hr1G108350	133.142	1.95253	0.193776	10.0762	7.03685e-24	9.01684e-23
HORVU2Hr1G108480	386.557	1.03644	0.113231	9.15335	5.5196e-20	6.11361e-19
HORVU2Hr1G108530	81.0318	2.87277	0.303705	9.45907	3.10693e-21	3.59999e-20
HORVU2Hr1G108790	5.96709	2.62807	1.00496	2.61509	0.0089203	0.0233656
HORVU2Hr1G109040	276.575	1.30993	0.176763	7.41068	1.25656e-13	1.02458e-12
HORVU2Hr1G109080	42.6125	1.02411	0.354739	2.88693	0.00389022	0.0110488
HORVU2Hr1G109340	11.4033	1.3979	0.570753	2.44922	0.0143165	0.0355926
HORVU2Hr1G109430	150.543	1.24894	0.200184	6.23897	4.40453e-10	2.86561e-09
HORVU2Hr1G109470	147.555	2.51571	0.193887	12.9751	1.69285e-38	3.17371e-37
HORVU2Hr1G109590	640.341	2.63463	0.110389	23.8669	6.76778e-126	3.79718e-124
HORVU2Hr1G109640	2447.62	2.79077	0.0542148	51.4761	0	0
HORVU2Hr1G109740	76.8714	-1.341	0.271883	-4.93229	8.12725e-07	3.97271e-06
HORVU2Hr1G109780	155.834	1.05282	0.160503	6.55949	5.39938e-11	3.7313e-10
HORVU2Hr1G109990	7.56009	3.02976	0.950641	3.18707	0.00143722	0.00446902
HORVU2Hr1G110080	1900.88	3.20694	0.0766356	41.8466	0	0
HORVU2Hr1G110310	5.56169	3.41799	1.06397	3.21248	0.00131593	0.00412517
HORVU2Hr1G110470	61.8801	-1.9914	0.264653	-7.52454	5.29064e-14	4.41192e-13
HORVU2Hr1G110900	2380.4	-1.13086	0.0806156	-14.0278	1.05333e-44	2.26923e-43
HORVU2Hr1G111760	183.521	3.2252	0.174338	18.4997	2.07797e-76	7.09516e-75
HORVU2Hr1G112060	244.408	-2.36122	0.177529	-13.3005	2.29894e-40	4.44705e-39
HORVU2Hr1G112170	2.6684	-4.04047	1.59227	-2.53756	0.0111628	0.028522
HORVU2Hr1G112230	156.408	2.50434	0.154683	16.1901	5.9191e-59	1.59843e-57
HORVU2Hr1G112580	161.211	-2.9529	0.215361	-13.7114	8.67795e-43	1.77052e-41
HORVU2Hr1G112620	225.552	-1.0565	0.148362	-7.12105	1.07104e-12	8.26376e-12
HORVU2Hr1G113120	54.6578	4.04349	0.445331	9.07974	1.08834e-19	1.19403e-18
HORVU2Hr1G113160	9.63799	5.2266	1.13341	4.6114	3.99973e-06	1.81396e-05
HORVU2Hr1G113180	501.985	-1.10131	0.106364	-10.3541	4.00846e-25	5.3222e-24
HORVU2Hr1G113250	111.105	1.23128	0.208456	5.90667	3.49096e-09	2.12809e-08
HORVU2Hr1G113410	33.5684	-1.04257	0.352666	-2.95624	0.00311414	0.00901521
HORVU2Hr1G113510	225.65	-2.18051	0.156838	-13.9029	6.07891e-44	1.27862e-42
HORVU2Hr1G113560	615.138	1.63364	0.111745	14.6194	2.11265e-48	4.83524e-47
HORVU2Hr1G113570	106.299	1.47977	0.19579	7.55794	4.09488e-14	3.43459e-13
HORVU2Hr1G114100	103.275	1.70337	0.21156	8.05148	8.17997e-16	7.47089e-15
HORVU2Hr1G114210	11.6142	3.11074	0.675732	4.60352	4.15415e-06	1.88178e-05
HORVU2Hr1G114220	4.59336	4.29596	1.41554	3.03486	0.0024065	0.00713828
HORVU2Hr1G114240	11.8627	1.25661	0.484828	2.59186	0.00954594	0.0248272
HORVU2Hr1G114460	9.38041	-1.72616	0.741493	-2.32796	0.0199143	0.0476148
HORVU2Hr1G115360	63.5275	2.34094	0.308516	7.58774	3.25543e-14	2.75146e-13
HORVU2Hr1G115830	85.7701	1.73978	0.23226	7.49065	6.85351e-14	5.67428e-13
HORVU2Hr1G115920	167.755	1.76636	0.157808	11.1931	4.40755e-29	6.59876e-28
HORVU2Hr1G116250	72.0466	-1.01682	0.255423	-3.98092	6.86498e-05	0.0002633
HORVU2Hr1G116300	14.4002	-3.89376	0.766845	-5.07764	3.8216e-07	1.93474e-06
HORVU2Hr1G116390	278.315	-1.376	0.129218	-10.6487	1.76859e-26	2.45248e-25
HORVU2Hr1G116730	2.18512	-5.15553	1.91897	-2.68661	0.0072181	0.0193185
HORVU2Hr1G116800	97.0919	-1.78461	0.194352	-9.18234	4.21828e-20	4.70379e-19
HORVU2Hr1G116880	501.762	1.01537	0.094945	10.6943	1.08189e-26	1.50838e-25
HORVU2Hr1G116970	140.471	2.61897	0.224019	11.6908	1.42037e-31	2.27536e-30
HORVU2Hr1G117050	10.5734	2.2154	0.738317	3.00061	0.00269437	0.00791398
HORVU2Hr1G117070	384.209	-2.20091	0.174451	-12.6162	1.71811e-36	3.07875e-35
HORVU2Hr1G117290	789.269	1.08485	0.0980344	11.0661	1.83289e-28	2.70038e-27
HORVU2Hr1G117400	3.79724	5.56983	1.44883	3.84435	0.00012087	0.000447118
HORVU2Hr1G117410	9.82159	7.3146	1.29085	5.66648	1.45758e-08	8.43813e-08
HORVU2Hr1G117550	17.4888	8.18972	1.23	6.65831	2.76985e-11	1.95804e-10
HORVU2Hr1G117610	18.5731	-4.05539	0.936494	-4.33039	1.48843e-05	6.28889e-05
HORVU2Hr1G117680	4.80864	4.33855	1.389	3.12352	0.00178704	0.00544903
HORVU2Hr1G117940	275.625	1.26531	0.164704	7.68233	1.56215e-14	1.3419e-13
HORVU2Hr1G118050	404.675	4.71141	0.173762	27.1141	6.71334e-162	4.89544e-160
HORVU2Hr1G118060	1487.01	3.90245	0.104007	37.5211	0	0
HORVU2Hr1G118080	579.406	2.70044	0.11171	24.1737	4.20483e-129	2.41188e-127
HORVU2Hr1G118100	575.41	1.24298	0.0886655	14.0187	1.19773e-44	2.5755e-43
HORVU2Hr1G118110	1044.09	2.28741	0.0904883	25.2786	5.49941e-141	3.49243e-139
HORVU2Hr1G118120	329.98	2.07461	0.134309	15.4465	7.96627e-54	1.99511e-52
HORVU2Hr1G118230	316.451	3.63829	0.169355	21.4832	2.23525e-102	1.01513e-100
HORVU2Hr1G118500	390.209	1.03467	0.10673	9.69424	3.19001e-22	3.86885e-21
HORVU2Hr1G118560	162.859	-1.38648	0.200807	-6.90457	5.03552e-12	3.72484e-11
HORVU2Hr1G118910	8.72846	-1.79827	0.683204	-2.63212	0.00848549	0.0223381
HORVU2Hr1G118950	117.059	1.33193	0.214413	6.212	5.23149e-10	3.39167e-09
HORVU2Hr1G118980	20.4184	1.25404	0.433924	2.89001	0.00385235	0.0109507
HORVU2Hr1G119110	118.99	1.66811	0.187214	8.9102	5.09388e-19	5.40883e-18
HORVU2Hr1G119160	16.0186	2.31832	0.570277	4.06525	4.7982e-05	0.000188535
HORVU2Hr1G119250	9.09657	-7.56233	1.33521	-5.66379	1.48067e-08	8.56751e-08
HORVU2Hr1G119500	191.666	-1.61518	0.177297	-9.11004	8.23497e-20	9.05612e-19
HORVU2Hr1G119780	95.146	-1.22675	0.200761	-6.11048	9.93315e-10	6.31156e-09
ENSRNA049481312	10.8155	-2.52369	0.697492	-3.61824	0.000296616	0.00104029
HORVU2Hr1G120010	658.143	1.08664	0.0852327	12.7491	3.15487e-37	5.76506e-36
HORVU2Hr1G120410	220.622	2.66028	0.18097	14.7001	6.43707e-49	1.48354e-47
HORVU2Hr1G120490	1047.65	1.90851	0.0993013	19.2194	2.54733e-82	9.33188e-81
HORVU2Hr1G121060	3543.59	2.7503	0.0688414	39.9513	0	0
HORVU2Hr1G121170	86.8763	-1.55758	0.253393	-6.1469	7.90142e-10	5.05954e-09
HORVU2Hr1G121200	86.0764	-1.29264	0.200594	-6.44404	1.16338e-10	7.86794e-10
HORVU2Hr1G121290	8.61297	1.94168	0.748571	2.59384	0.00949099	0.0247037
HORVU2Hr1G121310	248.53	1.47741	0.158123	9.34346	9.32403e-21	1.06279e-19
ENSRNA050017184	4.992	4.94892	1.45353	3.40476	0.000662233	0.00219472
HORVU2Hr1G121820	6.78888	2.51083	1.06425	2.35924	0.0183123	0.0441773
HORVU2Hr1G122300	15.8146	1.14237	0.468641	2.43763	0.0147839	0.0366091
HORVU2Hr1G122470	1225.56	1.13038	0.0849266	13.3101	2.02182e-40	3.91426e-39
HORVU2Hr1G122490	88.1453	4.28356	0.323863	13.2265	6.17073e-40	1.18671e-38
HORVU2Hr1G122580	154.992	2.41705	0.196037	12.3295	6.28104e-35	1.09085e-33
HORVU2Hr1G122590	7.7575	-2.35592	0.999851	-2.35627	0.0184593	0.0444947
HORVU2Hr1G122610	58.3927	-1.25736	0.267875	-4.69382	2.68146e-06	1.24019e-05
HORVU2Hr1G122620	54.6495	2.10102	0.269143	7.80631	5.88847e-15	5.15403e-14
HORVU2Hr1G122760	8.43736	6.94782	1.31734	5.27414	1.33379e-07	7.05695e-07
HORVU2Hr1G122800	3.28762	5.86582	1.4533	4.03621	5.43211e-05	0.000211716
HORVU2Hr1G123030	110.2	1.68247	0.240936	6.98307	2.88806e-12	2.17248e-11
HORVU2Hr1G123050	7.70442	5.2311	1.34711	3.88319	0.000103093	0.000385178
HORVU2Hr1G123100	31.7082	-2.41193	0.494649	-4.87605	1.08231e-06	5.21874e-06
HORVU2Hr1G123160	69.7854	2.18627	0.294935	7.41271	1.23747e-13	1.01008e-12
HORVU2Hr1G123200	174.53	-1.48906	0.161523	-9.2189	3.00157e-20	3.35676e-19
HORVU2Hr1G123270	1774.12	3.06321	0.0950163	32.2388	5.04955e-228	6.48474e-226
HORVU2Hr1G123350	996.848	1.2005	0.0719699	16.6806	1.81252e-62	5.22421e-61
HORVU2Hr1G123370	321.185	1.43545	0.11973	11.9891	4.05479e-33	6.76267e-32
HORVU2Hr1G123480	641.232	4.90514	0.159653	30.7237	2.74672e-207	3.00915e-205
HORVU2Hr1G123570	14.0417	2.18113	0.760866	2.86664	0.00414857	0.0117206
HORVU2Hr1G123590	944.614	1.52042	0.0981245	15.4948	3.76399e-54	9.48838e-53
HORVU2Hr1G123770	332.044	2.10187	0.129009	16.2925	1.11648e-59	3.06151e-58
HORVU2Hr1G123980	12.2573	2.98906	0.725385	4.12065	3.77808e-05	0.00015068
HORVU2Hr1G124300	29.8053	-1.32237	0.363398	-3.63892	0.000273784	0.000964607
HORVU2Hr1G124320	61.8251	-1.85347	0.278255	-6.66106	2.71859e-11	1.92357e-10
HORVU2Hr1G124510	51.6592	4.01448	0.578233	6.94268	3.84739e-12	2.86891e-11
HORVU2Hr1G124870	487.697	2.09776	0.105615	19.8622	8.63554e-88	3.34931e-86
HORVU2Hr1G124960	36.0888	1.13903	0.299225	3.80661	0.000140884	0.000516852
HORVU2Hr1G125200	28.6623	5.30211	0.664531	7.97872	1.47853e-15	1.33039e-14
HORVU2Hr1G125230	175.769	5.21948	0.229004	22.792	5.50058e-115	2.79454e-113
HORVU2Hr1G125580	13.423	2.30029	0.617238	3.72675	0.000193963	0.000696544
HORVU2Hr1G125600	1284.45	5.83118	0.150908	38.6405	0	0
HORVU2Hr1G125620	8.54942	3.23149	1.00328	3.22091	0.00127784	0.00401723
HORVU2Hr1G125950	1302.91	1.24741	0.0758884	16.4374	1.0329e-60	2.88017e-59
HORVU2Hr1G126080	21.7645	-1.58488	0.431212	-3.6754	0.000237477	0.00084208
HORVU2Hr1G126380	78.0994	1.83958	0.231825	7.93522	2.10116e-15	1.87675e-14
HORVU2Hr1G126440	19.998	2.50475	0.600625	4.17023	3.0429e-05	0.000123161
HORVU2Hr1G126470	51.8476	1.76837	0.292319	6.04945	1.45342e-09	9.11732e-09
HORVU2Hr1G126510	130.64	1.62563	0.267	6.08851	1.13964e-09	7.21162e-09
HORVU2Hr1G127100	457.381	2.05868	0.12944	15.9044	5.90427e-57	1.5387e-55
HORVU2Hr1G127120	44.0949	1.17336	0.349432	3.3579	0.00078536	0.00256771
HORVU3Hr1G000110	21.4527	1.49691	0.427457	3.50189	0.000461971	0.00156927
HORVU3Hr1G000120	753.198	1.75221	0.0698788	25.075	9.31048e-139	5.77e-137
HORVU3Hr1G000150	30.2151	1.3617	0.419219	3.24818	0.00116144	0.00368181
HORVU3Hr1G000600	6.21022	2.86296	0.92681	3.08905	0.002008	0.00605569
HORVU3Hr1G000980	96.8323	5.7608	0.395414	14.569	4.42239e-48	1.0042e-46
HORVU3Hr1G001020	240.05	5.48073	0.227008	24.1433	8.78194e-129	5.00008e-127
HORVU3Hr1G001030	153.005	2.26427	0.171402	13.2103	7.65328e-40	1.46451e-38
HORVU3Hr1G001040	1.75229	4.73304	1.83726	2.57614	0.00999106	0.0258395
HORVU3Hr1G001060	1622.42	3.28628	0.107581	30.5472	6.16405e-205	6.62736e-203
HORVU3Hr1G001250	35.6034	-1.18202	0.369033	-3.20301	0.00135998	0.00424942
HORVU3Hr1G001390	47.3241	4.44723	0.461476	9.63695	5.582e-22	6.69608e-21
HORVU3Hr1G001400	95.6876	4.11652	0.295063	13.9513	3.08888e-44	6.55672e-43
HORVU3Hr1G002000	26.5297	-1.2184	0.356917	-3.41369	0.000640886	0.00212886
HORVU3Hr1G002150	22.6165	1.04409	0.389411	2.68121	0.00733574	0.0196015
HORVU3Hr1G002210	321.192	1.31191	0.134189	9.77659	1.41912e-22	1.74213e-21
HORVU3Hr1G002220	35.2087	4.4789	0.462185	9.69072	3.30185e-22	4.00239e-21
HORVU3Hr1G002230	8.31352	2.15134	0.742156	2.89877	0.00374627	0.0106711
HORVU3Hr1G002820	835.192	2.00042	0.0699717	28.5889	9.23164e-180	7.93303e-178
HORVU3Hr1G002920	1136.08	1.23892	0.0677292	18.2923	9.5257e-75	3.20052e-73
HORVU3Hr1G002980	139.516	-1.58544	0.174612	-9.07978	1.08791e-19	1.19403e-18
HORVU3Hr1G003100	1.75695	4.78006	1.93657	2.46831	0.0135753	0.0339544
HORVU3Hr1G003140	56.1812	-1.94534	0.337738	-5.75991	8.41607e-09	4.96417e-08
HORVU3Hr1G003450	925.858	1.31368	0.0901901	14.5657	4.6441e-48	1.05248e-46
HORVU3Hr1G003480	324.424	1.32609	0.110585	11.9916	3.93298e-33	6.56424e-32
HORVU3Hr1G003540	110.308	-1.11301	0.206549	-5.38862	7.09988e-08	3.8653e-07
HORVU3Hr1G003860	12.1261	-1.89608	0.711523	-2.66482	0.00770292	0.0204879
HORVU3Hr1G003910	2.51813	5.52962	1.65533	3.3405	0.000836279	0.0027212
HORVU3Hr1G003920	586.018	2.32137	0.109339	21.2308	4.95933e-100	2.19197e-98
HORVU3Hr1G004050	44.6552	-2.92195	0.455232	-6.41861	1.37524e-10	9.24939e-10
HORVU3Hr1G004090	4.93668	3.7036	0.986567	3.75403	0.000174017	0.000630004
HORVU3Hr1G004110	5.84894	5.50511	1.32641	4.15039	3.31904e-05	0.000133663
HORVU3Hr1G004130	14.334	6.98055	1.2767	5.46766	4.56014e-08	2.53273e-07
HORVU3Hr1G004220	118.39	5.06844	0.320406	15.8188	2.30807e-56	5.98804e-55
HORVU3Hr1G005570	15.6429	-1.56716	0.581093	-2.69692	0.00699848	0.0187763
HORVU3Hr1G005800	80.1881	1.99075	0.277235	7.18071	6.935e-13	5.39944e-12
ENSRNA049487458	22.2745	4.76043	0.684454	6.95508	3.52363e-12	2.63941e-11
HORVU3Hr1G006290	1965.92	1.14069	0.0558924	20.4087	1.39981e-92	5.65701e-91
HORVU3Hr1G006410	89.4534	3.37161	0.313357	10.7596	5.33791e-27	7.49187e-26
HORVU3Hr1G006440	2132.81	-1.46929	0.141143	-10.4099	2.23424e-25	2.99401e-24
HORVU3Hr1G006450	825.822	-1.05033	0.0876484	-11.9834	4.33949e-33	7.22706e-32
HORVU3Hr1G006620	239.515	1.37198	0.143148	9.58432	9.30684e-22	1.1027e-20
HORVU3Hr1G006640	822.057	2.75538	0.0862317	31.9532	4.88246e-224	6.00334e-222
HORVU3Hr1G006740	249.835	1.19458	0.139301	8.57555	9.86103e-18	9.86786e-17
HORVU3Hr1G006760	26.8309	1.34125	0.415516	3.22791	0.00124696	0.00392816
HORVU3Hr1G006940	1042.68	2.07448	0.082403	25.1749	7.55292e-140	4.75731e-138
HORVU3Hr1G007290	2075.5	5.21464	0.0924782	56.3878	0	0
HORVU3Hr1G007420	886.739	4.56739	0.120389	37.9385	0	0
HORVU3Hr1G007500	15.5935	-1.90713	0.699559	-2.72619	0.006407	0.0173567
HORVU3Hr1G007590	838.741	2.19734	0.104573	21.0124	5.04634e-98	2.17633e-96
HORVU3Hr1G007680	1040.2	1.40175	0.066876	20.9605	1.50565e-97	6.44529e-96
HORVU3Hr1G007720	53.7642	1.448	0.386316	3.74823	0.000178084	0.000643218
HORVU3Hr1G007920	148.581	2.06436	0.17681	11.6756	1.69888e-31	2.71211e-30
HORVU3Hr1G009360	1244.41	1.55499	0.0887955	17.512	1.16086e-68	3.59712e-67
HORVU3Hr1G009370	289.827	1.33918	0.126228	10.6092	2.70063e-26	3.72036e-25
HORVU3Hr1G010310	187.303	1.0187	0.157867	6.45288	1.09743e-10	7.43284e-10
HORVU3Hr1G010540	37.1042	-1.69217	0.40571	-4.17088	3.0343e-05	0.000122839
HORVU3Hr1G010620	556.479	-1.05185	0.0938331	-11.2098	3.65218e-29	5.48563e-28
HORVU3Hr1G010920	58.9876	-2.15741	0.326423	-6.60925	3.86279e-11	2.7001e-10
HORVU3Hr1G011030	383.684	-2.20546	0.10742	-20.5313	1.13219e-93	4.63217e-92
HORVU3Hr1G011470	16.4756	-2.21851	0.584993	-3.79237	0.000149219	0.000545697
HORVU3Hr1G011490	10.4735	-2.28845	0.648446	-3.52913	0.000416936	0.00142572
HORVU3Hr1G011510	34.6304	-1.01107	0.351931	-2.87293	0.00406682	0.0115023
HORVU3Hr1G011560	775.48	-1.61356	0.081647	-19.7626	6.25281e-87	2.38515e-85
HORVU3Hr1G011710	9.09808	-1.77051	0.735022	-2.40879	0.0160055	0.0392455
HORVU3Hr1G011850	99.5476	-5.91893	0.620912	-9.53264	1.53339e-21	1.8057e-20
HORVU3Hr1G011990	24.855	-2.16198	0.390415	-5.53764	3.06578e-08	1.73146e-07
HORVU3Hr1G012080	19.9586	3.33539	0.52922	6.30246	2.92951e-10	1.93316e-09
HORVU3Hr1G012100	1967.93	1.05164	0.0587125	17.9117	9.54938e-72	3.11785e-70
HORVU3Hr1G012650	715.344	1.7906	0.101667	17.6124	1.97776e-69	6.19484e-68
HORVU3Hr1G012760	125.668	1.0788	0.204163	5.28401	1.26387e-07	6.69775e-07
HORVU3Hr1G012800	20.6584	1.01446	0.425016	2.38687	0.0169926	0.0413562
HORVU3Hr1G012860	14.8651	1.71919	0.61692	2.78673	0.00532436	0.0146889
HORVU3Hr1G012880	21.0958	1.50102	0.400276	3.74995	0.000176869	0.000639329
HORVU3Hr1G013180	167.069	3.26306	0.190772	17.1045	1.37461e-65	4.10536e-64
HORVU3Hr1G013270	74.931	1.13655	0.275429	4.12648	3.6836e-05	0.000147217
HORVU3Hr1G013380	530.86	3.16783	0.129132	24.5317	6.78422e-133	4.03147e-131
HORVU3Hr1G013390	439.225	2.22852	0.118813	18.7566	1.71088e-78	6.00132e-77
HORVU3Hr1G013810	1587.83	1.44643	0.0746717	19.3705	1.36795e-83	5.05945e-82
HORVU3Hr1G014560	13.8748	-1.66851	0.58713	-2.84181	0.00448588	0.012589
HORVU3Hr1G014890	1009.89	2.90344	0.105279	27.5784	2.01871e-167	1.55548e-165
HORVU3Hr1G015770	108.381	2.10258	0.236922	8.87455	7.02169e-19	7.41495e-18
HORVU3Hr1G015780	236.62	2.20803	0.16698	13.2234	6.43041e-40	1.23357e-38
HORVU3Hr1G016310	529.933	1.09373	0.0934675	11.7017	1.24865e-31	2.00304e-30
HORVU3Hr1G016860	2133.5	1.51699	0.102194	14.8442	7.58174e-50	1.78109e-48
HORVU3Hr1G016890	22.8705	-2.17397	0.589702	-3.68655	0.000227316	0.000808903
HORVU3Hr1G016900	9.26065	-1.8274	0.662975	-2.75636	0.00584493	0.0159744
HORVU3Hr1G017020	1432.01	1.29955	0.0585002	22.2145	2.48738e-109	1.20541e-107
HORVU3Hr1G017330	1358.67	1.65746	0.0688087	24.0879	3.34416e-128	1.89935e-126
HORVU3Hr1G017570	5.51413	-3.72738	1.36997	-2.72078	0.00651288	0.0176141
HORVU3Hr1G018390	189.618	1.84109	0.151678	12.1381	6.63284e-34	1.12491e-32
HORVU3Hr1G018430	288.067	3.88421	0.181856	21.3587	3.2396e-101	1.45978e-99
HORVU3Hr1G018690	249.992	-1.26734	0.156636	-8.09101	5.91738e-16	5.43665e-15
HORVU3Hr1G018980	37.2984	-1.22377	0.346925	-3.52748	0.000419534	0.00143418
HORVU3Hr1G019140	19.0844	-2.50994	0.550307	-4.56097	5.09175e-06	2.28501e-05
HORVU3Hr1G019230	315.586	2.84409	0.123956	22.9443	1.67886e-116	8.682e-115
HORVU3Hr1G019320	343.648	3.22587	0.133103	24.2359	9.30394e-130	5.37674e-128
HORVU3Hr1G019840	287.82	2.76004	0.148374	18.6019	3.10206e-77	1.07026e-75
HORVU3Hr1G019850	4.8884	-2.99809	1.15897	-2.58685	0.00968569	0.0251539
HORVU3Hr1G020090	10.8279	2.59441	0.913094	2.84134	0.00449243	0.0126059
HORVU3Hr1G020140	326.275	2.60004	0.146555	17.7411	2.01864e-70	6.45405e-69
HORVU3Hr1G020210	38.8739	-1.00524	0.435136	-2.31017	0.0208785	0.0495944
HORVU3Hr1G020230	1290.79	1.40027	0.0609262	22.9831	6.88006e-117	3.59005e-115
HORVU3Hr1G020390	141.713	1.40861	0.180227	7.81576	5.46318e-15	4.79085e-14
HORVU3Hr1G020520	57.8065	-2.45168	0.475263	-5.15858	2.48829e-07	1.28162e-06
HORVU3Hr1G020640	221.346	1.64976	0.19842	8.31451	9.21337e-17	8.7789e-16
HORVU3Hr1G020850	119.063	-1.10567	0.202106	-5.47073	4.48195e-08	2.4911e-07
HORVU3Hr1G021810	826.867	1.30738	0.0698555	18.7155	3.7002e-78	1.28816e-76
HORVU3Hr1G022260	1217.27	6.48583	0.160346	40.449	0	0
HORVU3Hr1G022340	7.21293	2.50843	0.861071	2.91315	0.00357805	0.0102174
HORVU3Hr1G022420	115.128	-1.25753	0.187093	-6.72142	1.79959e-11	1.28911e-10
HORVU3Hr1G022640	1050.35	1.595	0.0795374	20.0535	1.88036e-89	7.34231e-88
HORVU3Hr1G022780	59.441	1.19816	0.305945	3.91626	8.99336e-05	0.000339358
HORVU3Hr1G023230	260.967	-1.10819	0.160642	-6.89853	5.25429e-12	3.88169e-11
HORVU3Hr1G023400	345.745	1.62079	0.124258	13.0438	6.89508e-39	1.30538e-37
HORVU3Hr1G023460	14.1044	1.37524	0.514208	2.67448	0.00748443	0.0199619
HORVU3Hr1G023780	244.522	2.66607	0.143695	18.5537	7.6137e-77	2.61125e-75
HORVU3Hr1G024040	489.114	1.18533	0.101255	11.7064	1.18149e-31	1.89926e-30
HORVU3Hr1G024470	761.184	1.03853	0.0876457	11.8492	2.17166e-32	3.56029e-31
HORVU3Hr1G024540	341.274	-1.09548	0.108163	-10.1281	4.14577e-24	5.34488e-23
HORVU3Hr1G024560	45.9658	-1.05148	0.283285	-3.71176	0.000205824	0.000736506
HORVU3Hr1G024590	196.987	-1.03885	0.156248	-6.6487	2.95685e-11	2.0864e-10
HORVU3Hr1G024650	452.125	2.94121	0.131871	22.3038	3.39572e-110	1.65253e-108
HORVU3Hr1G024660	32.5548	1.10034	0.359926	3.05713	0.0022347	0.00667494
HORVU3Hr1G024820	85.0518	1.38161	0.239417	5.77071	7.89382e-09	4.66207e-08
HORVU3Hr1G025630	3.5303	-3.36023	1.32123	-2.54325	0.0109826	0.0281082
HORVU3Hr1G025810	55.348	1.4758	0.339729	4.34405	1.39881e-05	5.93517e-05
HORVU3Hr1G025950	116.415	4.26571	0.263071	16.215	3.94757e-59	1.06978e-57
HORVU3Hr1G026270	20.0466	1.99315	0.497786	4.00402	6.22746e-05	0.000240284
HORVU3Hr1G026840	20.9642	2.06199	0.504047	4.09087	4.29757e-05	0.000169701
HORVU3Hr1G027030	177.725	1.95603	0.167942	11.647	2.37554e-31	3.78189e-30
HORVU3Hr1G027240	43.7771	1.02332	0.284603	3.59558	0.000323664	0.00112797
HORVU3Hr1G027500	557.639	1.0277	0.0853927	12.035	2.32629e-33	3.9052e-32
HORVU3Hr1G027700	3158.15	2.18289	0.0567803	38.4445	0	0
HORVU3Hr1G027970	75.6775	-2.01684	0.251404	-8.02229	1.03794e-15	9.43119e-15
HORVU3Hr1G028000	285.162	1.35093	0.117833	11.4647	1.98346e-30	3.08544e-29
HORVU3Hr1G028260	59.3696	1.61348	0.29611	5.44892	5.06777e-08	2.80322e-07
HORVU3Hr1G028280	426.482	3.63506	0.132153	27.5065	1.4677e-166	1.11237e-164
HORVU3Hr1G028370	9.79229	3.55152	0.908576	3.90889	9.27222e-05	0.000349082
HORVU3Hr1G028410	101.583	1.02943	0.212	4.8558	1.19901e-06	5.76103e-06
HORVU3Hr1G028440	22.2243	4.568	0.682325	6.69476	2.16021e-11	1.53837e-10
HORVU3Hr1G028710	47.1445	-1.38744	0.319487	-4.34271	1.40734e-05	5.967e-05
HORVU3Hr1G028840	9.97283	3.53869	0.795882	4.44625	8.73812e-06	3.80827e-05
HORVU3Hr1G028860	418.638	2.26351	0.121987	18.5554	7.38211e-77	2.53558e-75
HORVU3Hr1G029400	2.4324	3.98497	1.53537	2.59545	0.00944677	0.0246136
HORVU3Hr1G030100	146.995	1.36711	0.187686	7.28403	3.23991e-13	2.56573e-12
HORVU3Hr1G030340	48.2753	-1.02378	0.258403	-3.96194	7.43438e-05	0.000284052
HORVU3Hr1G030460	13.9165	-2.96341	1.16294	-2.54821	0.0108276	0.0277514
HORVU3Hr1G030670	25.5012	1.62126	0.50701	3.1977	0.00138531	0.00432039
HORVU3Hr1G030980	16.2112	-1.6278	0.551252	-2.95292	0.00314785	0.00909914
HORVU3Hr1G031020	211.718	1.45536	0.167816	8.67236	4.23264e-18	4.32354e-17
HORVU3Hr1G032050	118.033	1.21768	0.193408	6.29588	3.05652e-10	2.01353e-09
HORVU3Hr1G032350	14.4009	1.90471	0.588746	3.2352	0.00121559	0.00383874
HORVU3Hr1G032370	250.234	1.28005	0.189196	6.76569	1.32673e-11	9.56308e-11
HORVU3Hr1G033480	97.5453	3.11765	0.24355	12.8009	1.62129e-37	2.97916e-36
HORVU3Hr1G033550	303.979	1.0253	0.118529	8.65015	5.14337e-18	5.23071e-17
HORVU3Hr1G033620	2.65981	5.44562	1.63294	3.33486	0.000853433	0.00277195
HORVU3Hr1G033740	1297.83	2.22571	0.0731255	30.4368	1.78978e-203	1.87206e-201
HORVU3Hr1G033950	70.8781	1.07421	0.255358	4.20669	2.59136e-05	0.000105871
HORVU3Hr1G034020	137.742	2.6456	0.257963	10.2557	1.11526e-24	1.46646e-23
HORVU3Hr1G035180	670.691	1.73784	0.0828021	20.9879	8.45806e-98	3.6409e-96
HORVU3Hr1G035210	27.8234	2.53037	0.366285	6.9082	4.90855e-12	3.6344e-11
HORVU3Hr1G035470	11162.8	2.33065	0.0671358	34.7154	4.61164e-264	7.40296e-262
HORVU3Hr1G035820	692.09	2.53499	0.106342	23.8381	1.34545e-125	7.53059e-124
HORVU3Hr1G035860	65.5697	1.60127	0.263306	6.0814	1.19139e-09	7.53289e-09
HORVU3Hr1G036280	29.6843	-1.77451	0.381354	-4.65319	3.26835e-06	1.49576e-05
HORVU3Hr1G036380	2035.02	1.00067	0.0638777	15.6654	2.60799e-55	6.69105e-54
HORVU3Hr1G036870	694.011	-1.11908	0.0734446	-15.237	2.00798e-52	4.92221e-51
HORVU3Hr1G036960	19.3163	1.68082	0.463369	3.6274	0.000286294	0.00100608
HORVU3Hr1G037030	77.8676	1.30685	0.281538	4.64181	3.45363e-06	1.57526e-05
HORVU3Hr1G037170	63.6735	-1.14845	0.234817	-4.89083	1.00413e-06	4.86102e-06
HORVU3Hr1G038230	26.563	1.56598	0.397546	3.93912	8.17815e-05	0.000310421
HORVU3Hr1G038320	22.1714	1.67393	0.430291	3.89023	0.000100151	0.000375084
HORVU3Hr1G039250	2.90966	4.25088	1.513	2.80956	0.0049609	0.0137716
HORVU3Hr1G040720	4.7937	4.0033	1.21237	3.30204	0.000959838	0.00308762
HORVU3Hr1G040880	2820.05	-1.22074	0.0437451	-27.9056	2.27988e-171	1.82359e-169
HORVU3Hr1G044660	12.1823	-1.32521	0.554633	-2.38934	0.0168787	0.0411136
HORVU3Hr1G046860	209.79	2.27008	0.157927	14.3742	7.51591e-47	1.67701e-45
HORVU3Hr1G047220	58.3579	2.05268	0.296535	6.92222	4.44633e-12	3.29956e-11
HORVU3Hr1G047690	35.6314	1.40174	0.36933	3.79536	0.000147429	0.000539664
HORVU3Hr1G048610	574.91	1.08315	0.105051	10.3107	6.30453e-25	8.32299e-24
HORVU3Hr1G048630	10.985	1.76615	0.656294	2.6911	0.00712178	0.019085
HORVU3Hr1G049390	16.9833	1.10743	0.465871	2.37711	0.0174487	0.0423548
HORVU3Hr1G049640	1867.68	2.75831	0.0702844	39.245	0	0
HORVU3Hr1G049780	965.093	1.22603	0.0800811	15.3099	6.57103e-53	1.62456e-51
HORVU3Hr1G049920	11.6332	2.76306	0.688332	4.01414	5.96636e-05	0.000231097
HORVU3Hr1G050590	635.138	4.2055	0.131833	31.9003	2.64761e-223	3.23821e-221
HORVU3Hr1G050770	26.1719	2.92183	0.494848	5.9045	3.53722e-09	2.15572e-08
HORVU3Hr1G051370	14.7343	6.85133	1.26743	5.40568	6.45612e-08	3.5323e-07
HORVU3Hr1G052030	29.5809	1.8062	0.357349	5.05445	4.31639e-07	2.17049e-06
HORVU3Hr1G052300	8.41751	-1.78276	0.720236	-2.47525	0.0133144	0.033374
HORVU3Hr1G052400	240.109	1.47223	0.123116	11.9581	5.88947e-33	9.79431e-32
HORVU3Hr1G052710	215.925	-1.4143	0.121483	-11.642	2.5211e-31	4.00809e-30
HORVU3Hr1G053080	9.75005	-1.58016	0.612486	-2.57991	0.00988266	0.0256021
HORVU3Hr1G053210	64.1822	4.19116	0.397853	10.5345	5.99316e-26	8.13493e-25
HORVU3Hr1G053350	197.399	-2.03646	0.200505	-10.1567	3.09474e-24	4.01673e-23
HORVU3Hr1G053380	3611.62	2.0589	0.118694	17.3463	2.10272e-67	6.39559e-66
HORVU3Hr1G053900	87.1177	1.26377	0.252523	5.00457	5.59878e-07	2.78206e-06
HORVU3Hr1G054710	17.1793	1.41875	0.454403	3.12223	0.00179488	0.00547078
HORVU3Hr1G055620	119.61	1.4429	0.210664	6.84928	7.42205e-12	5.44142e-11
HORVU3Hr1G055830	317.759	2.1662	0.14036	15.4331	9.79957e-54	2.44629e-52
HORVU3Hr1G056630	9.30027	-2.43948	0.833922	-2.92531	0.00344112	0.00987399
HORVU3Hr1G056640	218.675	4.01165	0.221787	18.0879	3.97023e-73	1.31862e-71
HORVU3Hr1G056960	605.07	2.55074	0.097378	26.1942	3.09275e-151	2.12143e-149
HORVU3Hr1G057540	98.6814	1.28195	0.229527	5.58517	2.33475e-08	1.33095e-07
HORVU3Hr1G058220	1570.78	-1.25764	0.0581674	-21.621	1.14013e-103	5.23959e-102
HORVU3Hr1G058670	290.518	5.68153	0.276953	20.5144	1.60125e-93	6.53967e-92
HORVU3Hr1G059130	17938.6	-1.66095	0.0275576	-60.2718	0	0
HORVU3Hr1G059170	35.9371	2.53299	0.390751	6.48235	9.0302e-11	6.14128e-10
HORVU3Hr1G059210	2.82874	4.37694	1.4414	3.03658	0.00239281	0.00710405
HORVU3Hr1G059220	492.79	3.67909	0.123953	29.6814	1.33624e-193	1.27638e-191
HORVU3Hr1G059530	33.4342	1.33347	0.322402	4.13605	3.53342e-05	0.000141631
HORVU3Hr1G060500	215.625	1.41333	0.154941	9.12174	7.39249e-20	8.1529e-19
HORVU3Hr1G060570	43.0303	1.44189	0.368454	3.91334	9.10294e-05	0.000343306
HORVU3Hr1G060600	47.8484	4.92996	0.512848	9.61291	7.05296e-22	8.41261e-21
HORVU3Hr1G061000	930.076	1.94188	0.0983337	19.7478	8.37148e-87	3.18282e-85
HORVU3Hr1G061080	119.372	2.22934	0.240065	9.2864	1.59595e-20	1.80225e-19
HORVU3Hr1G061130	93.8257	1.41885	0.232962	6.09049	1.12569e-09	7.12916e-09
HORVU3Hr1G061190	9.41183	2.14334	0.651825	3.28821	0.00100825	0.00322673
HORVU3Hr1G061560	34.9297	-2.21587	0.415474	-5.33336	9.64102e-08	5.18525e-07
HORVU3Hr1G061840	78.5476	1.55955	0.242234	6.43819	1.20905e-10	8.16969e-10
HORVU3Hr1G062430	1451.43	3.26397	0.0837697	38.9636	0	0
HORVU3Hr1G062520	24.7594	3.2911	0.486395	6.76632	1.32098e-11	9.52459e-11
HORVU3Hr1G062730	10.4082	3.22696	0.663937	4.86034	1.17184e-06	5.63632e-06
HORVU3Hr1G063630	344.81	5.20576	0.290439	17.9237	7.69703e-72	2.51661e-70
HORVU3Hr1G063640	223.444	5.62424	0.272032	20.6749	5.82612e-95	2.4266e-93
HORVU3Hr1G063660	24.8054	1.65949	0.436177	3.80463	0.000142019	0.000520847
HORVU3Hr1G064080	10162.8	-1.34343	0.069388	-19.3611	1.64357e-83	6.06913e-82
HORVU3Hr1G064110	802.896	1.7119	0.0763119	22.433	1.87586e-111	9.28529e-110
HORVU3Hr1G064130	141.313	1.32468	0.178288	7.42996	1.08631e-13	8.89202e-13
HORVU3Hr1G064180	410.693	2.72909	0.124129	21.9859	3.9271e-107	1.85642e-105
HORVU3Hr1G064190	24.8813	2.19039	0.395398	5.53971	3.0298e-08	1.71281e-07
HORVU3Hr1G064320	52.8101	1.37811	0.308665	4.46472	8.01721e-06	3.50929e-05
HORVU3Hr1G064450	23.2289	2.12955	0.420092	5.06924	3.99407e-07	2.01587e-06
HORVU3Hr1G064470	427.918	-2.27716	0.113366	-20.0868	9.62956e-90	3.77283e-88
HORVU3Hr1G064640	580.744	1.95725	0.0959878	20.3906	2.02765e-92	8.17998e-91
HORVU3Hr1G064680	157.648	1.77738	0.177479	10.0146	1.3152e-23	1.6677e-22
HORVU3Hr1G064960	62.6752	1.27851	0.283662	4.50716	6.57005e-06	2.90922e-05
HORVU3Hr1G065320	274.592	-2.40279	0.147631	-16.2756	1.4705e-59	4.02273e-58
HORVU3Hr1G065390	239.565	-2.1395	0.154651	-13.8344	1.58059e-43	3.28864e-42
HORVU3Hr1G065610	118.252	2.22393	0.254826	8.72722	2.61019e-18	2.69002e-17
HORVU3Hr1G065620	105.752	2.39785	0.293343	8.17425	2.9772e-16	2.77952e-15
HORVU3Hr1G065630	87.8693	2.13976	0.30228	7.07873	1.45485e-12	1.10955e-11
HORVU3Hr1G065640	61.7104	2.49756	0.393414	6.34843	2.1752e-10	1.44863e-09
HORVU3Hr1G066050	15.5997	-1.12637	0.482093	-2.33641	0.01947	0.0466489
HORVU3Hr1G066090	3.40351	-2.75365	1.17734	-2.33887	0.0193422	0.0463908
HORVU3Hr1G066280	24.6873	1.99524	0.505996	3.9432	8.0401e-05	0.000305632
HORVU3Hr1G066390	122.567	4.08872	0.318093	12.8538	8.18353e-38	1.51579e-36
HORVU3Hr1G066420	1414.09	1.99308	0.0887578	22.4552	1.1377e-111	5.64356e-110
HORVU3Hr1G066650	43.8522	1.24368	0.30314	4.10266	4.08427e-05	0.000161997
HORVU3Hr1G067510	27.8317	3.10874	0.45152	6.88505	5.77658e-12	4.25666e-11
HORVU3Hr1G067580	92.5837	1.92479	0.216556	8.88817	6.21226e-19	6.58124e-18
HORVU3Hr1G067590	678.798	1.97221	0.0856816	23.0179	3.08388e-117	1.61282e-115
HORVU3Hr1G067760	630.107	1.90449	0.105144	18.1132	2.50909e-73	8.35738e-72
HORVU3Hr1G068140	8.75348	4.0714	0.992616	4.10168	4.10154e-05	0.000162654
HORVU3Hr1G068270	92.6055	1.20498	0.205159	5.8734	4.26947e-09	2.58089e-08
HORVU3Hr1G068410	619.094	-1.14341	0.0906913	-12.6077	1.91507e-36	3.42637e-35
HORVU3Hr1G068580	1.76233	-4.25381	1.70653	-2.49266	0.012679	0.0319511
HORVU3Hr1G068640	21.8146	-1.45345	0.451744	-3.21742	0.00129347	0.00406138
HORVU3Hr1G068650	162.154	-1.76094	0.182214	-9.66412	4.28276e-22	5.16164e-21
HORVU3Hr1G068760	147.309	3.36018	0.210718	15.9464	3.01985e-57	7.90564e-56
HORVU3Hr1G068810	19.5159	2.06218	0.430677	4.78823	1.68261e-06	7.9443e-06
HORVU3Hr1G069000	746.37	1.97718	0.104154	18.9833	2.34377e-80	8.42589e-79
HORVU3Hr1G069010	1285.18	3.46262	0.0956956	36.1836	1.1011e-286	2.06935e-284
HORVU3Hr1G069030	2179.19	1.00682	0.0643844	15.6376	4.037e-55	1.03115e-53
HORVU3Hr1G069080	14.9422	1.31885	0.471551	2.79683	0.00516072	0.01428
HORVU3Hr1G069260	4309.74	-1.09394	0.0460627	-23.7488	1.12987e-124	6.24836e-123
HORVU3Hr1G069320	52.8426	-1.03864	0.355402	-2.92242	0.00347319	0.00994872
HORVU3Hr1G069650	71.2155	-2.23623	0.279686	-7.99551	1.29037e-15	1.16516e-14
HORVU3Hr1G069750	42.1085	3.29449	0.394301	8.35525	6.52946e-17	6.26287e-16
HORVU3Hr1G069760	6.94272	2.57248	0.892841	2.88123	0.00396125	0.0112381
HORVU3Hr1G069940	1.78811	4.31685	1.85701	2.32462	0.0200924	0.0479809
HORVU3Hr1G069960	14.4389	1.64427	0.54107	3.03893	0.00237419	0.00705455
HORVU3Hr1G070240	80.1092	1.19003	0.207543	5.73388	9.81574e-09	5.76182e-08
HORVU3Hr1G070270	125.109	2.07896	0.191438	10.8597	1.79283e-27	2.55191e-26
HORVU3Hr1G070560	15.0389	-1.32695	0.529098	-2.50795	0.0121433	0.0307453
HORVU3Hr1G070700	2566.77	4.19934	0.0805003	52.1656	0	0
HORVU3Hr1G070790	21.1609	-1.14773	0.418974	-2.73938	0.00615558	0.0167344
HORVU3Hr1G070900	30.3876	-1.02928	0.341952	-3.01002	0.00261231	0.00769253
HORVU3Hr1G071320	517.909	2.56105	0.0996347	25.7044	1.04392e-145	6.87498e-144
HORVU3Hr1G071410	100.901	1.33667	0.216458	6.17518	6.60883e-10	4.25306e-09
HORVU3Hr1G071470	4478.9	2.97155	0.0928476	32.0046	9.41592e-225	1.16395e-222
HORVU3Hr1G071500	360.293	1.33392	0.10922	12.2132	2.64388e-34	4.53381e-33
HORVU3Hr1G071640	1.72133	5.34908	1.89197	2.82726	0.00469488	0.0131156
HORVU3Hr1G071770	159.434	-1.47072	0.173781	-8.46309	2.6039e-17	2.54511e-16
HORVU3Hr1G071830	254.927	1.40755	0.14378	9.78963	1.24747e-22	1.53386e-21
HORVU3Hr1G071880	94.397	1.23955	0.208252	5.95217	2.64617e-09	1.629e-08
HORVU3Hr1G072310	6.961	-5.53617	1.33558	-4.14516	3.39579e-05	0.000136588
HORVU3Hr1G072670	15.8897	-1.59649	0.497476	-3.20918	0.00133116	0.00416841
HORVU3Hr1G072730	117.882	1.02027	0.198413	5.14215	2.71611e-07	1.39431e-06
HORVU3Hr1G072810	185.639	2.34372	0.212594	11.0244	2.91337e-28	4.24624e-27
HORVU3Hr1G072910	431.378	1.28258	0.0988586	12.9739	1.72086e-38	3.22361e-37
HORVU3Hr1G073100	667.498	-1.25178	0.0820617	-15.2541	1.54535e-52	3.80025e-51
HORVU3Hr1G073280	138.187	5.26865	0.316054	16.6701	2.162e-62	6.21603e-61
HORVU3Hr1G073780	674.235	1.65195	0.0819907	20.148	2.80296e-90	1.10569e-88
HORVU3Hr1G073850	63.1903	2.01962	0.32974	6.12488	9.07512e-10	5.78226e-09
HORVU3Hr1G073860	465.743	-1.77494	0.129071	-13.7517	4.9757e-43	1.02148e-41
HORVU3Hr1G074250	2087.92	1.55651	0.0478427	32.5339	3.54013e-232	4.73027e-230
HORVU3Hr1G074320	9.26838	3.6193	1.2128	2.98424	0.00284281	0.00829518
HORVU3Hr1G074720	5.47459	3.60664	1.06617	3.38279	0.000717532	0.00236174
HORVU3Hr1G075150	113.918	1.30044	0.195432	6.65417	2.84898e-11	2.01275e-10
HORVU3Hr1G075210	1.61275	4.71103	1.94339	2.42413	0.015345	0.0378281
HORVU3Hr1G076710	22.5593	3.2433	0.52805	6.14204	8.14663e-10	5.20934e-09
HORVU3Hr1G076920	14.3573	-4.97758	1.27661	-3.89905	9.65713e-05	0.000362511
HORVU3Hr1G077070	81.3097	4.24927	0.369385	11.5036	1.26482e-30	1.98087e-29
HORVU3Hr1G077110	301.632	1.23468	0.116597	10.5893	3.34108e-26	4.5917e-25
HORVU3Hr1G077130	126.397	2.03855	0.188482	10.8157	2.9018e-27	4.10766e-26
HORVU3Hr1G077580	290.466	2.62381	0.147797	17.7528	1.63957e-70	5.25662e-69
HORVU3Hr1G077670	144.868	2.862	0.238503	11.9999	3.55785e-33	5.94673e-32
HORVU3Hr1G077790	19.1567	-2.80622	0.588596	-4.76765	1.86391e-06	8.76627e-06
HORVU3Hr1G077880	66.5488	-1.9252	0.289415	-6.65202	2.89097e-11	2.04179e-10
HORVU3Hr1G077890	213	1.09935	0.131207	8.37869	5.35192e-17	5.15694e-16
HORVU3Hr1G077930	53.237	1.05588	0.291634	3.62055	0.000293976	0.00103166
HORVU3Hr1G077980	87.0951	1.23226	0.208069	5.92237	3.17344e-09	1.94015e-08
HORVU3Hr1G078360	6.4995	-2.85862	0.847358	-3.37356	0.000742022	0.00243506
HORVU3Hr1G078390	608.433	-1.81621	0.113673	-15.9775	1.8327e-57	4.82513e-56
HORVU3Hr1G078490	80.8296	-1.10807	0.236368	-4.68789	2.76039e-06	1.27491e-05
HORVU3Hr1G078530	47.8473	1.18463	0.279881	4.23263	2.30973e-05	9.51725e-05
HORVU3Hr1G078560	12.0718	1.47326	0.577556	2.55085	0.0107461	0.0275547
HORVU3Hr1G078760	253.585	2.004	0.143107	14.0035	1.48323e-44	3.18351e-43
HORVU3Hr1G078960	286.922	-1.22841	0.143412	-8.56565	1.07468e-17	1.07263e-16
HORVU3Hr1G079180	78.1451	1.36368	0.233267	5.84599	5.03564e-09	3.02426e-08
HORVU3Hr1G079400	61.2001	2.40266	0.296145	8.11313	4.93329e-16	4.55605e-15
HORVU3Hr1G079410	60.9565	1.94098	0.329818	5.885	3.98058e-09	2.41319e-08
HORVU3Hr1G079540	37.5981	1.88427	0.351807	5.35597	8.50989e-08	4.59292e-07
HORVU3Hr1G079620	555.119	-1.17525	0.091102	-12.9004	4.4784e-38	8.32177e-37
HORVU3Hr1G079800	58.7762	-1.7329	0.306956	-5.64543	1.64768e-08	9.51244e-08
HORVU3Hr1G079860	464.287	1.27786	0.098999	12.9078	4.06609e-38	7.56169e-37
HORVU3Hr1G079870	3318.76	1.15116	0.0450955	25.5271	9.85954e-144	6.36629e-142
HORVU3Hr1G079970	29.724	5.13016	0.686096	7.47732	7.58546e-14	6.26011e-13
HORVU3Hr1G079980	5.89486	5.53527	1.3367	4.14099	3.45812e-05	0.000138902
HORVU3Hr1G079990	263.127	1.62857	0.133041	12.2411	1.87407e-34	3.21611e-33
HORVU3Hr1G080500	4013.28	1.45682	0.0431844	33.7347	1.79084e-249	2.67077e-247
HORVU3Hr1G080770	729.371	3.59359	0.104374	34.4298	9.02613e-260	1.40032e-257
HORVU3Hr1G080830	842.314	1.24485	0.0704898	17.66	8.52776e-70	2.68933e-68
HORVU3Hr1G081000	5.70221	3.64837	1.49182	2.44558	0.0144621	0.0359083
HORVU3Hr1G081060	1754.45	1.2433	0.0875123	14.2072	8.26779e-46	1.81155e-44
HORVU3Hr1G081100	528.053	1.56239	0.0881417	17.7259	2.64533e-70	8.4112e-69
HORVU3Hr1G081180	44.3464	3.71255	0.386645	9.60195	7.84488e-22	9.31393e-21
HORVU3Hr1G081230	27.6586	3.57167	0.472676	7.55628	4.14746e-14	3.47617e-13
HORVU3Hr1G081270	172.2	2.08986	0.18872	11.0739	1.67999e-28	2.47987e-27
HORVU3Hr1G081280	925.681	2.14251	0.0871055	24.5968	1.36849e-133	8.21661e-132
HORVU3Hr1G081380	511.076	1.71657	0.110883	15.4809	4.66581e-54	1.17234e-52
HORVU3Hr1G081640	21.8112	2.22508	0.528233	4.2123	2.5278e-05	0.000103402
HORVU3Hr1G081660	289.18	-1.09389	0.138928	-7.87377	3.44116e-15	3.04307e-14
HORVU3Hr1G081880	268.094	1.19426	0.133398	8.95258	3.47284e-19	3.72521e-18
HORVU3Hr1G081960	41.5896	-1.56053	0.320922	-4.86263	1.15837e-06	5.57502e-06
HORVU3Hr1G082030	32.0511	-1.37844	0.382582	-3.603	0.000314569	0.00109876
HORVU3Hr1G082130	272.746	-1.08448	0.125031	-8.67369	4.18326e-18	4.27499e-17
HORVU3Hr1G082170	1316.99	1.09095	0.0611064	17.8532	2.72747e-71	8.86755e-70
HORVU3Hr1G082210	251.795	3.03422	0.164958	18.3939	1.47053e-75	4.97698e-74
HORVU3Hr1G082250	8.60731	2.2168	0.776479	2.85494	0.0043045	0.0121227
HORVU3Hr1G082440	213.717	-1.50913	0.142054	-10.6236	2.31397e-26	3.19723e-25
HORVU3Hr1G082460	2155.91	-1.81119	0.0628473	-28.8188	1.2459e-182	1.10345e-180
HORVU3Hr1G082490	60.2822	-1.33683	0.324167	-4.1239	3.7251e-05	0.000148721
HORVU3Hr1G082580	6832.17	-2.13426	0.0570579	-37.4052	3.22004e-306	6.41677e-304
HORVU3Hr1G083190	223.221	4.43106	0.200128	22.1412	1.26921e-108	6.1123e-107
HORVU3Hr1G083250	65.4559	1.9763	0.267812	7.37945	1.5894e-13	1.28508e-12
HORVU3Hr1G083330	4.42012	-3.59827	1.45483	-2.47332	0.0133864	0.033529
HORVU3Hr1G083470	13950.5	-1.82808	0.0683494	-26.7461	1.37058e-157	9.7484e-156
HORVU3Hr1G083500	46.7978	1.34561	0.38113	3.53059	0.000414639	0.0014181
HORVU3Hr1G083650	237.424	3.54526	0.16267	21.7942	2.63598e-105	1.23597e-103
HORVU3Hr1G083680	1231.48	3.95263	0.185835	21.2696	2.16935e-100	9.62507e-99
HORVU3Hr1G083740	28.9053	1.51883	0.414411	3.66502	0.00024732	0.000875772
HORVU3Hr1G083820	151.97	3.44788	0.214712	16.0582	5.01045e-58	1.33281e-56
HORVU3Hr1G084120	65.4549	1.14798	0.270509	4.24378	2.19791e-05	9.07913e-05
HORVU3Hr1G084220	772.083	2.52229	0.0989409	25.4929	2.36473e-143	1.51842e-141
HORVU3Hr1G084250	7.12103	3.20144	0.817306	3.91707	8.96327e-05	0.000338277
HORVU3Hr1G084830	921.836	1.10496	0.0812119	13.6059	3.6931e-42	7.43639e-41
HORVU3Hr1G085100	473.389	-1.10992	0.125339	-8.85536	8.3413e-19	8.76443e-18
HORVU3Hr1G085520	1478.83	-1.12119	0.0776518	-14.4387	2.95553e-47	6.6524e-46
HORVU3Hr1G085640	248.622	1.78227	0.144238	12.3564	4.49761e-35	7.83473e-34
HORVU3Hr1G085930	610.423	1.59087	0.113083	14.0681	5.96085e-45	1.29139e-43
HORVU3Hr1G086030	5.46254	5.96893	1.55345	3.84237	0.000121852	0.000450531
HORVU3Hr1G086040	627.519	1.40043	0.0933239	15.0061	6.69362e-51	1.60342e-49
HORVU3Hr1G086150	261.221	3.8426	0.178695	21.5037	1.43741e-102	6.54079e-101
HORVU3Hr1G086180	5.32646	2.631	1.06189	2.47766	0.0132249	0.0331641
HORVU3Hr1G086220	625.045	3.82663	0.147414	25.9585	1.45961e-148	9.7798e-147
HORVU3Hr1G086230	338.013	7.22832	0.346501	20.8609	1.21378e-96	5.16716e-95
HORVU3Hr1G086240	476.345	6.78304	0.258615	26.2283	1.2645e-151	8.72545e-150
HORVU3Hr1G086400	33.078	1.21309	0.344028	3.52612	0.000421691	0.00144113
HORVU3Hr1G086480	913.155	1.55136	0.069201	22.4182	2.61752e-111	1.29012e-109
HORVU3Hr1G086690	23.9908	-1.11812	0.440787	-2.53665	0.011192	0.0285778
HORVU3Hr1G086700	17.8406	-2.06184	0.58904	-3.50034	0.000464661	0.00157772
HORVU3Hr1G087010	52.7522	1.03253	0.282727	3.65205	0.000260159	0.000918845
HORVU3Hr1G087020	208.057	1.43904	0.143802	10.0071	1.4185e-23	1.79672e-22
HORVU3Hr1G087050	1054.65	1.38402	0.0661232	20.931	2.79788e-97	1.19328e-95
HORVU3Hr1G087110	237.017	1.43965	0.13549	10.6256	2.26667e-26	3.13375e-25
HORVU3Hr1G087480	34.6971	-3.19985	0.44549	-7.18276	6.83177e-13	5.32086e-12
HORVU3Hr1G087570	37.0327	-3.74024	0.897745	-4.16626	3.09638e-05	0.000125176
HORVU3Hr1G087610	7.96871	1.9078	0.820766	2.32442	0.0201031	0.0479965
HORVU3Hr1G087690	36.6669	-1.98101	0.400731	-4.94348	7.6742e-07	3.7608e-06
HORVU3Hr1G087740	799.901	2.25514	0.0870103	25.9181	4.16152e-148	2.78028e-146
HORVU3Hr1G087770	2.99741	3.9562	1.56229	2.53231	0.0113314	0.0288859
HORVU3Hr1G088120	1.73291	-4.96409	1.76971	-2.80504	0.00503106	0.0139563
HORVU3Hr1G088190	295.984	1.20012	0.137298	8.74101	2.31034e-18	2.38738e-17
HORVU3Hr1G088200	6249.4	3.30925	0.0573502	57.7024	0	0
HORVU3Hr1G088270	7.06621	-3.06859	0.81808	-3.75097	0.000176155	0.000637146
HORVU3Hr1G088360	29.3481	-2.15503	0.415861	-5.18208	2.19427e-07	1.13652e-06
HORVU3Hr1G088860	394.911	1.99579	0.112735	17.7033	3.95223e-70	1.2515e-68
HORVU3Hr1G088970	667.154	-1.19806	0.0764865	-15.6637	2.67768e-55	6.86223e-54
HORVU3Hr1G089030	53.4351	1.1736	0.278901	4.20793	2.57724e-05	0.000105332
HORVU3Hr1G089090	823.024	1.4412	0.0691644	20.8373	1.98692e-96	8.42747e-95
HORVU3Hr1G089290	1424.89	1.18351	0.0757441	15.6251	4.90896e-55	1.25249e-53
HORVU3Hr1G089370	2842.93	-1.61812	0.0582927	-27.7585	1.37584e-169	1.07445e-167
HORVU3Hr1G089380	2312.91	-2.46711	0.0632282	-39.0191	0	0
HORVU3Hr1G089510	208.184	1.29492	0.136752	9.46912	2.82215e-21	3.27988e-20
HORVU3Hr1G089830	13487.4	1.79172	0.0483127	37.0859	4.7445e-301	9.29439e-299
HORVU3Hr1G089910	469.164	-1.02438	0.107915	-9.49248	2.25605e-21	2.63388e-20
HORVU3Hr1G090030	35.8813	1.20493	0.360782	3.33977	0.000838467	0.00272717
HORVU3Hr1G090050	17.5403	1.29795	0.475741	2.72826	0.00636691	0.0172602
HORVU3Hr1G090220	405.462	2.86632	0.12265	23.3699	8.65195e-121	4.66197e-119
HORVU3Hr1G090410	266.206	1.55744	0.176491	8.82447	1.09978e-18	1.15034e-17
HORVU3Hr1G090560	2331.45	1.15897	0.0563895	20.553	7.23749e-94	2.97161e-92
HORVU3Hr1G090730	337.603	1.31035	0.119977	10.9217	9.08266e-28	1.30569e-26
HORVU3Hr1G090740	33.4276	7.6665	1.21507	6.30953	2.79887e-10	1.85118e-09
HORVU3Hr1G091020	99.13	3.18001	0.228787	13.8994	6.38575e-44	1.34072e-42
HORVU3Hr1G091070	12.3252	2.34905	0.623163	3.76956	0.000163536	0.00059448
HORVU3Hr1G091120	3.12925	3.21568	1.34027	2.39928	0.0164273	0.0401452
HORVU3Hr1G091360	85.8103	1.67819	0.255709	6.56287	5.27808e-11	3.65294e-10
HORVU3Hr1G091440	2.35291	-4.69504	1.73873	-2.70027	0.00692829	0.0186161
HORVU3Hr1G092250	1941.93	1.92799	0.0647045	29.7969	4.28098e-195	4.14055e-193
HORVU3Hr1G092460	25.8622	6.18962	0.88913	6.96144	3.36807e-12	2.52616e-11
HORVU3Hr1G092470	651.289	2.03404	0.0876545	23.2052	4.03475e-119	2.15398e-117
HORVU3Hr1G092820	8.15365	5.80796	1.3238	4.38735	1.1474e-05	4.92722e-05
HORVU3Hr1G093100	2256.91	3.94679	0.0775666	50.8826	0	0
HORVU3Hr1G093110	39.122	1.24547	0.410448	3.0344	0.00241012	0.00714719
HORVU3Hr1G093240	239.334	1.31161	0.138149	9.49417	2.21974e-21	2.59542e-20
HORVU3Hr1G093370	83.6725	1.56923	0.235714	6.65736	2.7879e-11	1.97019e-10
HORVU3Hr1G093550	178.413	1.61036	0.157257	10.2403	1.30784e-24	1.71481e-23
HORVU3Hr1G093730	21.0875	1.50323	0.494784	3.03816	0.0023803	0.00706964
HORVU3Hr1G094320	11.1203	1.79778	0.622377	2.88857	0.00386993	0.0109966
HORVU3Hr1G094340	585.033	1.45729	0.112284	12.9786	1.61822e-38	3.03627e-37
HORVU3Hr1G094370	308.59	2.89479	0.1306	22.1653	7.43134e-109	3.58628e-107
HORVU3Hr1G094600	823.264	1.58871	0.109596	14.496	1.28363e-47	2.90053e-46
HORVU3Hr1G094990	27.7931	-1.00485	0.3756	-2.67533	0.00746557	0.0199185
HORVU3Hr1G095070	1163.09	-1.09881	0.0757632	-14.5031	1.15722e-47	2.61744e-46
HORVU3Hr1G095080	2.06146	-4.44196	1.69129	-2.62637	0.00862997	0.0226719
HORVU3Hr1G095200	7.47084	-4.69628	1.27529	-3.68252	0.000230936	0.000821152
HORVU3Hr1G095580	26.4426	2.26655	0.384367	5.89683	3.70545e-09	2.2529e-08
HORVU3Hr1G095670	11.3317	-2.48264	0.84885	-2.92471	0.00344783	0.00989079
HORVU3Hr1G095820	444.213	1.61378	0.110475	14.6076	2.51061e-48	5.72339e-47
HORVU3Hr1G095830	55.8878	1.47449	0.24284	6.07189	1.26417e-09	7.97344e-09
HORVU3Hr1G096120	26.3817	-1.2175	0.384219	-3.16878	0.00153081	0.00473205
HORVU3Hr1G096210	2539.14	2.90453	0.0637613	45.5532	0	0
HORVU3Hr1G096280	522.995	1.48631	0.139067	10.6877	1.16243e-26	1.61872e-25
HORVU3Hr1G096360	472.559	2.29684	0.0950479	24.1651	5.17774e-129	2.95528e-127
HORVU3Hr1G096620	2064.32	1.58851	0.0522534	30.4002	5.46727e-203	5.66732e-201
HORVU3Hr1G096740	10.6609	2.58431	0.628364	4.11276	3.90949e-05	0.00015549
HORVU3Hr1G096760	324.25	2.50063	0.136586	18.3081	7.12608e-75	2.40126e-73
HORVU3Hr1G096850	2890.14	2.48653	0.0558025	44.5596	0	0
HORVU3Hr1G096890	39.5481	-2.19707	0.398451	-5.51402	3.5072e-08	1.96778e-07
HORVU3Hr1G097300	56.9502	3.49269	0.367902	9.49355	2.23287e-21	2.60945e-20
HORVU3Hr1G097390	11.8423	-1.53711	0.61772	-2.48836	0.0128333	0.0322978
HORVU3Hr1G097770	249.305	1.02247	0.138231	7.39684	1.39467e-13	1.1312e-12
HORVU3Hr1G097860	73.9191	-2.13379	0.261092	-8.17256	3.01902e-16	2.81629e-15
HORVU3Hr1G097950	4104.55	1.05863	0.0759611	13.9365	3.8009e-44	8.03858e-43
HORVU3Hr1G098160	2789.35	1.58389	0.0803435	19.714	1.6336e-86	6.19054e-85
HORVU3Hr1G098280	14.7402	4.42069	0.8156	5.42018	5.95398e-08	3.26762e-07
HORVU3Hr1G098340	306.836	-2.80078	0.160158	-17.4876	1.78146e-68	5.48463e-67
HORVU3Hr1G098400	1246.13	1.45248	0.0921819	15.7567	6.17894e-56	1.59768e-54
HORVU3Hr1G098610	99.4514	3.01305	0.215607	13.9747	2.2232e-44	4.74529e-43
HORVU3Hr1G098730	58.9198	1.33627	0.27931	4.78418	1.71685e-06	8.09603e-06
HORVU3Hr1G099090	18.5849	-1.1831	0.462725	-2.55682	0.0105634	0.0271314
HORVU3Hr1G099160	41.9763	-3.57795	0.425997	-8.39901	4.50277e-17	4.36237e-16
HORVU3Hr1G099220	608.099	1.40398	0.102383	13.713	8.48555e-43	1.73279e-41
HORVU3Hr1G099530	499.109	1.69372	0.121271	13.9664	2.4989e-44	5.31903e-43
HORVU3Hr1G099550	69.5195	-1.49256	0.254657	-5.86108	4.59875e-09	2.77341e-08
HORVU3Hr1G099590	61.2379	3.48258	0.324309	10.7385	6.7139e-27	9.40028e-26
HORVU3Hr1G099630	107.813	1.6981	0.203983	8.32473	8.45221e-17	8.07027e-16
HORVU3Hr1G099690	28.8148	1.61611	0.40328	4.00741	6.13887e-05	0.000237143
HORVU3Hr1G099760	1609.23	-1.03278	0.141694	-7.28879	3.12758e-13	2.48103e-12
HORVU3Hr1G102860	12.5153	1.80403	0.567778	3.17736	0.00148623	0.0046078
HORVU3Hr1G103120	232.457	1.02151	0.140411	7.27514	3.46057e-13	2.73673e-12
HORVU3Hr1G103960	17.0218	3.3903	0.595183	5.69622	1.22492e-08	7.13229e-08
HORVU3Hr1G104090	8.73444	6.82341	1.30889	5.21311	1.85702e-07	9.67475e-07
HORVU3Hr1G104200	11.0191	-5.96844	1.33582	-4.46799	7.89573e-06	3.45874e-05
HORVU3Hr1G104570	4.54216	-2.76212	1.09905	-2.5132	0.0119642	0.0303417
HORVU3Hr1G104600	15.775	-2.71719	0.530087	-5.12593	2.96076e-07	1.51385e-06
HORVU3Hr1G104940	13279.2	2.80311	0.0533162	52.5751	0	0
HORVU3Hr1G105020	2487.94	1.01088	0.0477264	21.1808	1.43504e-99	6.30655e-98
HORVU3Hr1G105190	756.051	1.39542	0.0935485	14.9165	2.57321e-50	6.09449e-49
HORVU3Hr1G105290	907.221	1.95036	0.0787742	24.7588	2.48982e-135	1.50273e-133
HORVU3Hr1G105300	2744.11	2.89183	0.0652055	44.3495	0	0
HORVU3Hr1G105360	85.8865	1.50194	0.228649	6.56875	5.07403e-11	3.51487e-10
HORVU3Hr1G105400	186.329	2.16099	0.160559	13.4592	2.71808e-41	5.34734e-40
HORVU3Hr1G105420	960.634	1.22925	0.0683037	17.9968	2.06479e-72	6.79912e-71
HORVU3Hr1G105610	8.70469	3.32361	0.784738	4.23531	2.28239e-05	9.41296e-05
HORVU3Hr1G105630	639.029	1.10016	0.132004	8.33431	7.79502e-17	7.4551e-16
HORVU3Hr1G105870	307.26	2.74108	0.133472	20.5368	1.01103e-93	4.14379e-92
HORVU3Hr1G105890	1.25298	4.93736	1.94313	2.54093	0.0110559	0.028277
HORVU3Hr1G106950	2577.23	3.06542	0.0816487	37.544	0	0
HORVU3Hr1G107090	3025.84	4.22727	0.0746058	56.6614	0	0
HORVU3Hr1G107680	3.46393	4.45888	1.41599	3.14894	0.00163863	0.00503705
HORVU3Hr1G108100	1541.74	2.32734	0.0746707	31.168	2.89149e-213	3.2926e-211
HORVU3Hr1G108360	157.629	1.18277	0.166876	7.08776	1.36298e-12	1.04223e-11
HORVU3Hr1G108370	22.7251	3.11968	0.503137	6.20046	5.62987e-10	3.64334e-09
HORVU3Hr1G108430	19.0434	-1.31616	0.507961	-2.59106	0.00956802	0.0248762
HORVU3Hr1G108540	935.094	-1.04952	0.0768254	-13.6611	1.73446e-42	3.50776e-41
HORVU3Hr1G108630	238.794	5.84591	0.323336	18.08	4.58225e-73	1.5197e-71
HORVU3Hr1G108670	971.779	-2.21094	0.0862169	-25.6439	4.94226e-145	3.22727e-143
HORVU3Hr1G108900	304.471	1.27714	0.142049	8.99084	2.45347e-19	2.6502e-18
HORVU3Hr1G108920	106.598	1.82336	0.194486	9.37526	6.90027e-21	7.91204e-20
HORVU3Hr1G108970	582.968	1.67674	0.0960444	17.4579	2.9968e-68	9.18754e-67
HORVU3Hr1G109010	208.694	1.16225	0.135456	8.58023	9.46813e-18	9.47879e-17
HORVU3Hr1G109170	156.926	4.76499	0.281646	16.9184	3.29525e-64	9.70355e-63
HORVU3Hr1G109180	48.9807	5.41284	0.584698	9.2575	2.09276e-20	2.35637e-19
HORVU3Hr1G109200	5.79353	4.71483	1.26764	3.71936	0.000199725	0.000715901
HORVU3Hr1G109220	146.178	4.15059	0.242502	17.1157	1.13361e-65	3.38998e-64
HORVU3Hr1G109230	171.216	3.26138	0.216803	15.043	3.83586e-51	9.23643e-50
HORVU3Hr1G109350	1376.56	1.47533	0.0745103	19.8004	2.95414e-87	1.13435e-85
HORVU3Hr1G109430	135.669	1.04173	0.176963	5.88671	3.93961e-09	2.38961e-08
HORVU3Hr1G109460	52.3596	1.11796	0.269662	4.14578	3.38664e-05	0.000136244
HORVU3Hr1G109590	15.0304	3.54421	0.590014	6.00699	1.88998e-09	1.17506e-08
HORVU3Hr1G109930	9.53736	-1.70186	0.643028	-2.64663	0.00812977	0.0215217
HORVU3Hr1G110330	3458.36	-1.80915	0.0604895	-29.9085	1.52463e-196	1.50613e-194
HORVU3Hr1G110580	126.414	3.34787	0.231341	14.4715	1.83315e-47	4.1382e-46
HORVU3Hr1G111580	17.9713	-1.17965	0.429864	-2.74425	0.00606493	0.0165054
HORVU3Hr1G111600	4359.37	1.45897	0.0702768	20.7603	9.89919e-96	4.16054e-94
HORVU3Hr1G112030	77.8247	-1.54147	0.24645	-6.25469	3.98307e-10	2.60166e-09
HORVU3Hr1G112050	134.492	-1.62749	0.252256	-6.45175	1.10563e-10	7.48613e-10
HORVU3Hr1G112060	19.2638	-1.80636	0.503754	-3.58581	0.000336033	0.00116615
HORVU3Hr1G112080	64.0756	-1.71791	0.284373	-6.04103	1.5313e-09	9.59026e-09
HORVU3Hr1G112150	5.45835	3.32232	1.40573	2.3634	0.0181079	0.0437361
HORVU3Hr1G112520	210.434	1.26428	0.160256	7.88916	3.04239e-15	2.69973e-14
HORVU3Hr1G112610	11.1273	2.18908	0.672903	3.25319	0.00114119	0.00362259
HORVU3Hr1G112920	17.8448	1.54283	0.538348	2.86587	0.00415868	0.0117449
HORVU3Hr1G113620	17835	1.67752	0.0687622	24.396	1.88471e-131	1.10018e-129
HORVU3Hr1G114240	24.4548	-1.25133	0.371554	-3.36784	0.000757593	0.00248405
HORVU3Hr1G114800	113.439	1.0153	0.215775	4.70536	2.53421e-06	1.17514e-05
HORVU3Hr1G115000	475.369	1.60448	0.0960593	16.703	1.2467e-62	3.60235e-61
HORVU3Hr1G115580	51.6621	-1.07021	0.267028	-4.00786	6.12725e-05	0.000236773
HORVU3Hr1G115840	1670.29	-1.24509	0.0831106	-14.9812	9.74735e-51	2.32768e-49
HORVU3Hr1G116050	49.1119	-1.37852	0.322826	-4.27015	1.95339e-05	8.10529e-05
HORVU3Hr1G116310	43.6936	-4.82719	0.56884	-8.48602	2.13827e-17	2.10243e-16
HORVU3Hr1G116440	123.686	1.34693	0.172513	7.80775	5.82187e-15	5.09766e-14
HORVU3Hr1G116580	75.9691	2.64164	0.255005	10.3592	3.80224e-25	5.05711e-24
HORVU3Hr1G116650	960.253	2.41819	0.0861782	28.0604	2.98416e-173	2.45487e-171
HORVU3Hr1G116730	109.713	2.65405	0.225975	11.7449	7.50357e-32	1.21465e-30
HORVU3Hr1G117780	2.51847	3.79543	1.52302	2.49205	0.0127007	0.0319955
HORVU3Hr1G117910	163.247	1.14304	0.203178	5.62579	1.84665e-08	1.06002e-07
HORVU5Hr1G000240	12.1453	2.16212	0.622582	3.47284	0.000514991	0.00173409
HORVU5Hr1G000630	620.425	1.70508	0.0734186	23.2241	2.59864e-119	1.39374e-117
HORVU5Hr1G000640	2284.65	5.42091	0.0880699	61.5523	0	0
HORVU5Hr1G000800	398.208	1.023	0.107112	9.55079	1.28715e-21	1.51727e-20
HORVU5Hr1G000910	125.292	1.59981	0.166292	9.62045	6.55468e-22	7.84255e-21
HORVU5Hr1G000940	828.905	2.33974	0.0813749	28.7526	8.40784e-182	7.33418e-180
HORVU5Hr1G001180	16521.7	-2.30596	0.0613502	-37.5869	0	0
HORVU5Hr1G001920	687.643	1.68343	0.0891448	18.8842	1.53911e-79	5.44006e-78
HORVU5Hr1G002340	591.874	2.58223	0.093645	27.5747	2.23939e-167	1.71979e-165
ENSRNA049480867	11.7278	1.31916	0.56658	2.32829	0.0198968	0.0475779
ENSRNA049480879	52.3491	1.61089	0.291653	5.52333	3.32642e-08	1.87134e-07
HORVU5Hr1G004630	9.3351	3.38593	1.03604	3.26815	0.00108251	0.00344674
HORVU5Hr1G004700	94.4123	-1.05224	0.203685	-5.166	2.39158e-07	1.23346e-06
HORVU5Hr1G005190	3.71646	-4.09805	1.52109	-2.69416	0.00705661	0.0189169
HORVU5Hr1G005210	218.67	1.23875	0.159777	7.75295	8.97802e-15	7.80211e-14
HORVU5Hr1G005290	71.294	1.75447	0.39126	4.48414	7.32078e-06	3.22399e-05
HORVU5Hr1G005980	38452.6	1.00312	0.0329656	30.4293	2.24909e-203	2.34189e-201
HORVU5Hr1G005990	558.051	-1.3516	0.0815024	-16.5836	9.15638e-62	2.60343e-60
HORVU5Hr1G006280	149.746	1.77565	0.18048	9.8385	7.68467e-23	9.51976e-22
HORVU5Hr1G006290	11.8582	1.90519	0.573608	3.32142	0.000895602	0.00289914
HORVU5Hr1G006350	581.363	1.16365	0.0896256	12.9835	1.51781e-38	2.8525e-37
HORVU5Hr1G006550	9.877	-3.17778	0.970297	-3.27505	0.00105642	0.0033669
HORVU5Hr1G007430	46.8257	-1.10616	0.316826	-3.49138	0.00048054	0.00162733
HORVU5Hr1G007670	58.3549	1.21569	0.257249	4.72571	2.29312e-06	1.06741e-05
HORVU5Hr1G007760	36.0009	5.35929	0.656349	8.16531	3.20605e-16	2.98233e-15
HORVU5Hr1G007840	29.5908	1.06853	0.355714	3.00389	0.0026655	0.00783516
HORVU5Hr1G008340	209.204	-1.22684	0.154181	-7.95719	1.75997e-15	1.57566e-14
HORVU5Hr1G009560	85.711	-1.14455	0.219768	-5.20801	1.9088e-07	9.93332e-07
HORVU5Hr1G009650	33.4374	1.38641	0.370172	3.7453	0.000180176	0.00064996
HORVU5Hr1G009840	187.85	1.21902	0.143128	8.51698	1.63769e-17	1.6192e-16
HORVU5Hr1G010120	7456.85	1.98755	0.0691204	28.7549	7.86913e-182	6.89026e-180
HORVU5Hr1G010130	8868.76	1.93617	0.103374	18.7297	2.83475e-78	9.88358e-77
HORVU5Hr1G010420	19.4753	4.20931	0.584627	7.2	6.02124e-13	4.70227e-12
HORVU5Hr1G010560	92.4255	2.98429	0.304423	9.8031	1.09178e-22	1.34528e-21
HORVU5Hr1G010870	1177	-1.12556	0.0679024	-16.5761	1.03692e-61	2.94466e-60
HORVU5Hr1G010880	270.627	4.25483	0.209066	20.3516	4.49458e-92	1.80376e-90
HORVU5Hr1G010930	7.84475	-2.35273	0.639114	-3.68124	0.000232101	0.000824914
HORVU5Hr1G011090	77.1135	2.38125	0.274706	8.66835	4.3843e-18	4.47253e-17
HORVU5Hr1G011640	317.629	1.90477	0.129888	14.6648	1.0841e-48	2.48858e-47
HORVU5Hr1G011730	2289.93	-2.49625	0.0820123	-30.4375	1.7523e-203	1.8496e-201
HORVU5Hr1G012010	107.021	4.46227	0.279563	15.9616	2.36569e-57	6.21425e-56
HORVU5Hr1G012040	634.868	2.992	0.103976	28.7758	4.31038e-182	3.78855e-180
HORVU5Hr1G012120	504.391	2.95548	0.109512	26.9877	2.06049e-160	1.48381e-158
HORVU5Hr1G012190	8.4936	2.85234	0.816817	3.49202	0.000479378	0.00162363
HORVU5Hr1G012770	149.857	-1.99534	0.164307	-12.144	6.17482e-34	1.048e-32
HORVU5Hr1G012780	1048.99	-1.87402	0.0746803	-25.094	5.78883e-139	3.59717e-137
HORVU5Hr1G013400	1358.78	-1.16348	0.0674589	-17.2472	1.17454e-66	3.54446e-65
HORVU5Hr1G014060	666.322	5.36055	0.162616	32.9645	2.61876e-238	3.6467e-236
HORVU5Hr1G014070	132.884	10.8742	1.19093	9.13088	6.7947e-20	7.50795e-19
HORVU5Hr1G014090	6.5973	-3.11317	1.119	-2.7821	0.00540078	0.0148695
HORVU5Hr1G014130	39.8483	-3.01174	0.47152	-6.3873	1.68844e-10	1.13196e-09
HORVU5Hr1G014290	3158.76	1.77021	0.0550763	32.1411	1.17475e-226	1.48391e-224
ENSRNA049489445	9.27171	2.08468	0.780832	2.66983	0.00758906	0.020213
HORVU5Hr1G015600	15.8002	2.50088	0.795112	3.14531	0.0016591	0.00509185
HORVU5Hr1G015660	6.87317	3.21718	1.12672	2.85535	0.004299	0.0121108
ENSRNA049489465	3.81607	3.31635	1.277	2.59698	0.00940481	0.0245208
HORVU5Hr1G015700	17.9548	2.86469	1.05943	2.704	0.00685109	0.0184215
ENSRNA049489507	7.51736	3.32249	0.983021	3.37988	0.000725187	0.0023832
ENSRNA049489516	2.99717	4.96155	1.7221	2.88111	0.00396283	0.0112398
HORVU5Hr1G016810	179.158	2.15972	0.189484	11.3979	4.28292e-30	6.5696e-29
HORVU5Hr1G017360	20.7521	-1.42098	0.470022	-3.02323	0.00250095	0.00739189
HORVU5Hr1G018720	46.1826	1.31869	0.27856	4.73398	2.20164e-06	1.02678e-05
HORVU5Hr1G018780	425.735	1.12828	0.121475	9.28812	1.57037e-20	1.77509e-19
HORVU5Hr1G018930	247.149	1.55311	0.135574	11.4558	2.19807e-30	3.4124e-29
HORVU5Hr1G019720	2.85086	3.93039	1.50234	2.61618	0.00889186	0.0233096
HORVU5Hr1G019820	197.792	3.19303	0.164206	19.4453	3.19408e-84	1.19088e-82
HORVU5Hr1G020300	621.971	1.14669	0.110222	10.4035	2.39114e-25	3.20056e-24
HORVU5Hr1G020320	54.9467	1.19326	0.281489	4.23909	2.24424e-05	9.26058e-05
HORVU5Hr1G021230	6.50086	3.96967	1.40358	2.82825	0.00468031	0.0130775
HORVU5Hr1G022550	31.7411	1.23063	0.311328	3.95286	7.72239e-05	0.000294232
HORVU5Hr1G022580	9.10022	2.66549	0.730825	3.64723	0.00026508	0.000935654
HORVU5Hr1G022920	41.4151	1.24139	0.30726	4.04019	5.34081e-05	0.000208509
HORVU5Hr1G022980	46.7572	1.08467	0.337393	3.21487	0.00130503	0.0040949
HORVU5Hr1G023480	31.2563	2.0089	0.387298	5.18697	2.13749e-07	1.10835e-06
HORVU5Hr1G023530	267.144	1.74077	0.134571	12.9357	2.82897e-38	5.27801e-37
HORVU5Hr1G023660	13.3741	1.78043	0.609116	2.92297	0.00346705	0.00993361
HORVU5Hr1G023720	740.837	1.26347	0.0990008	12.7622	2.6641e-37	4.87595e-36
HORVU5Hr1G023730	2190.42	1.51793	0.0578021	26.2608	5.38547e-152	3.72726e-150
HORVU5Hr1G023990	214.519	1.11644	0.155056	7.20023	6.01118e-13	4.69732e-12
HORVU5Hr1G024040	21.1129	2.21719	0.49101	4.51558	6.31447e-06	2.80379e-05
HORVU5Hr1G024060	1502.13	1.47812	0.0555222	26.6222	3.75787e-156	2.65648e-154
HORVU5Hr1G024170	24.6331	1.10765	0.3908	2.83433	0.00459224	0.0128547
HORVU5Hr1G024390	102.554	1.9523	0.260705	7.48854	6.96462e-14	5.76214e-13
HORVU5Hr1G024400	1186.9	2.17297	0.0936083	23.2134	3.33291e-119	1.78342e-117
HORVU5Hr1G025760	21.9397	-1.34047	0.474275	-2.82636	0.00470797	0.0131484
HORVU5Hr1G026270	3.82492	6.60025	1.42984	4.61609	3.91042e-06	1.7752e-05
HORVU5Hr1G027740	325.654	-1.3841	0.127145	-10.886	1.34439e-27	1.91951e-26
HORVU5Hr1G028180	439.963	-1.25951	0.0900685	-13.9839	1.95501e-44	4.17671e-43
HORVU5Hr1G028460	499.392	4.37606	0.132188	33.1048	2.53435e-240	3.6163e-238
HORVU5Hr1G029260	22.0947	-1.21699	0.440757	-2.76114	0.00575994	0.0157682
HORVU5Hr1G030720	38.5018	1.13442	0.300196	3.77892	0.000157512	0.000573845
HORVU5Hr1G034830	148.333	6.5731	0.477254	13.7728	3.71703e-43	7.65119e-42
HORVU5Hr1G035350	477.369	1.06754	0.0930461	11.4733	1.79716e-30	2.7994e-29
HORVU5Hr1G037270	13.4879	1.09382	0.467456	2.33993	0.0192871	0.0462923
HORVU5Hr1G037300	84.672	-1.03793	0.229156	-4.52939	5.91551e-06	2.6383e-05
HORVU5Hr1G037660	1755.69	1.19616	0.0588689	20.3191	8.71959e-92	3.48121e-90
HORVU5Hr1G040310	38.7092	2.71509	0.353763	7.67488	1.65568e-14	1.42014e-13
HORVU5Hr1G040700	9.4377	2.30089	0.937736	2.45366	0.014141	0.0352055
HORVU5Hr1G041590	371.158	2.04582	0.136692	14.9667	1.21245e-50	2.88344e-49
HORVU5Hr1G041660	332.778	2.68759	0.136305	19.7174	1.52921e-86	5.80448e-85
HORVU5Hr1G041780	44.2725	-1.03999	0.268346	-3.87556	0.000106381	0.000396692
HORVU5Hr1G041870	206.426	1.75984	0.139654	12.6014	2.07512e-36	3.70128e-35
HORVU5Hr1G041960	42.457	-1.79254	0.338807	-5.29074	1.21823e-07	6.46183e-07
HORVU5Hr1G042030	100.075	6.29996	0.864496	7.28744	3.15904e-13	2.50513e-12
HORVU5Hr1G042740	1386.22	3.1795	0.0688647	46.1702	0	0
HORVU5Hr1G043010	98.9433	4.19294	0.344041	12.1873	3.63153e-34	6.1953e-33
HORVU5Hr1G043310	102.75	1.93062	0.204076	9.46028	3.07107e-21	3.56023e-20
HORVU5Hr1G043460	176.777	2.23567	0.16365	13.6613	1.72885e-42	3.49949e-41
HORVU5Hr1G043700	461.989	1.91694	0.130095	14.7349	3.84623e-49	8.89983e-48
HORVU5Hr1G043710	4.38307	2.75431	1.00498	2.74066	0.00613155	0.0166769
HORVU5Hr1G043730	146.527	1.23749	0.170229	7.26956	3.60648e-13	2.85017e-12
HORVU5Hr1G043780	2188.48	-1.01191	0.0705814	-14.3367	1.28974e-46	2.85845e-45
HORVU5Hr1G044350	46.423	2.40942	0.345961	6.96443	3.29731e-12	2.4747e-11
HORVU5Hr1G044370	34.5204	-2.93178	0.473341	-6.1938	5.87296e-10	3.79428e-09
HORVU5Hr1G044460	194.173	-1.15176	0.148663	-7.74746	9.37467e-15	8.12542e-14
HORVU5Hr1G044610	23.3443	-2.6411	0.514916	-5.12918	2.91001e-07	1.48955e-06
HORVU5Hr1G045640	124.985	-1.1942	0.216371	-5.51922	3.40508e-08	1.9142e-07
HORVU5Hr1G045650	10.8295	-2.17811	0.825981	-2.637	0.00836432	0.0220643
HORVU5Hr1G045850	3445.81	1.92983	0.0456278	42.2951	0	0
HORVU5Hr1G046110	19.7043	1.32111	0.463571	2.84986	0.00437378	0.0123013
HORVU5Hr1G046850	314.309	2.65566	0.12576	21.1169	5.56136e-99	2.43018e-97
HORVU5Hr1G047150	103.475	-2.80831	0.24333	-11.5412	8.18108e-31	1.28736e-29
HORVU5Hr1G047420	1955.11	-1.03419	0.0476716	-21.694	2.33898e-104	1.08352e-102
HORVU5Hr1G047520	13.8522	3.92403	0.690385	5.68383	1.31714e-08	7.65191e-08
HORVU5Hr1G047640	6.6874	-2.36044	0.774766	-3.04665	0.00231406	0.00688794
HORVU5Hr1G047840	66.3572	1.79166	0.250552	7.15085	8.62439e-13	6.68549e-12
HORVU5Hr1G048180	52.9455	-1.0336	0.258456	-3.99915	6.35715e-05	0.000244961
HORVU5Hr1G048300	2043.71	-2.2173	0.0686914	-32.2791	1.37387e-228	1.78418e-226
HORVU5Hr1G049880	3607.7	3.14473	0.0600694	52.3517	0	0
HORVU5Hr1G050240	364.981	1.16115	0.121505	9.55641	1.21912e-21	1.43782e-20
HORVU5Hr1G050420	531.878	1.80683	0.0872521	20.7081	2.9257e-95	1.22519e-93
HORVU5Hr1G050940	58.4154	1.3992	0.271611	5.15149	2.58427e-07	1.3281e-06
HORVU5Hr1G051560	24.2796	4.79686	0.632795	7.58044	3.44386e-14	2.90435e-13
HORVU5Hr1G051570	112.853	1.14636	0.202936	5.64887	1.61502e-08	9.33087e-08
HORVU5Hr1G051760	36.6947	-1.84027	0.358233	-5.13706	2.79067e-07	1.43131e-06
HORVU5Hr1G052190	38.0707	-1.61782	0.367666	-4.40024	1.08132e-05	4.65731e-05
HORVU5Hr1G052300	15.8265	-1.53419	0.591473	-2.59385	0.00949068	0.0247037
HORVU5Hr1G052630	22.6916	1.59576	0.493387	3.2343	0.0012194	0.00384815
HORVU5Hr1G052730	244.194	2.18189	0.153861	14.1809	1.20252e-45	2.6224e-44
HORVU5Hr1G052760	121.931	3.6979	0.235628	15.6938	1.66804e-55	4.28904e-54
HORVU5Hr1G053930	98.7414	3.11719	0.242779	12.8396	9.83865e-38	1.81654e-36
HORVU5Hr1G054510	434.374	1.10136	0.0990624	11.1178	1.02768e-28	1.52574e-27
HORVU5Hr1G055850	1604.56	2.13727	0.0686899	31.1147	1.52325e-212	1.71763e-210
HORVU5Hr1G055920	729.494	1.00255	0.0722014	13.8854	7.76337e-44	1.62848e-42
HORVU5Hr1G055950	29924.9	1.32327	0.0697416	18.9738	2.80664e-80	1.00587e-78
HORVU5Hr1G056040	13534.2	1.75103	0.0773229	22.6457	1.53907e-113	7.75099e-112
HORVU5Hr1G056100	3.70294	-4.7205	1.50909	-3.12805	0.00175972	0.00537141
HORVU5Hr1G056130	1510.53	4.44027	0.0901074	49.2776	0	0
HORVU5Hr1G056670	585.237	1.10542	0.102497	10.7848	4.05945e-27	5.71835e-26
HORVU5Hr1G057090	1341.47	2.11817	0.0789434	26.8315	1.3855e-158	9.91555e-157
HORVU5Hr1G057670	337.097	3.09171	0.161211	19.178	5.6499e-82	2.05674e-80
HORVU5Hr1G057690	3.95384	-4.94326	1.55749	-3.17387	0.00150424	0.00465675
HORVU5Hr1G057740	151.842	-2.03944	0.204859	-9.95533	2.39022e-23	3.00611e-22
HORVU5Hr1G057800	304.379	1.68149	0.1258	13.3664	9.50445e-41	1.84781e-39
HORVU5Hr1G058020	373.056	2.45691	0.122627	20.0357	2.68946e-89	1.04663e-87
HORVU5Hr1G058070	437.028	2.06404	0.113583	18.1721	8.58979e-74	2.86939e-72
HORVU5Hr1G058170	241.425	1.36917	0.132626	10.3235	5.51591e-25	7.30273e-24
HORVU5Hr1G058240	7.62724	-1.9695	0.734811	-2.68027	0.00735619	0.0196539
HORVU5Hr1G058270	1687.48	1.16876	0.0790489	14.7852	1.82409e-49	4.25486e-48
HORVU5Hr1G058810	9.3117	-1.48482	0.618745	-2.39973	0.0164072	0.0401003
HORVU5Hr1G059060	1.31725	4.51524	1.87882	2.40324	0.0162507	0.039764
HORVU5Hr1G059200	1965.12	1.27579	0.0667216	19.121	1.68716e-81	6.11291e-80
HORVU5Hr1G059280	59.0906	4.65309	0.480313	9.68763	3.40336e-22	4.12112e-21
HORVU5Hr1G059690	53.514	-1.17135	0.273866	-4.27708	1.89359e-05	7.8713e-05
HORVU5Hr1G059890	59.378	2.57285	0.308223	8.34738	6.97914e-17	6.68309e-16
HORVU5Hr1G059900	9.17149	3.40945	0.848797	4.0168	5.89933e-05	0.00022873
HORVU5Hr1G060140	144.109	2.2533	0.213457	10.5563	4.75233e-26	6.48111e-25
HORVU5Hr1G060650	30.3184	3.17139	0.562285	5.64018	1.69875e-08	9.79017e-08
HORVU5Hr1G061040	8.42948	1.77651	0.654008	2.71634	0.00660081	0.0178253
HORVU5Hr1G061130	142.998	1.12877	0.16588	6.80475	1.01228e-11	7.36538e-11
HORVU5Hr1G061150	327.771	2.63619	0.133043	19.8145	2.23113e-87	8.59582e-86
HORVU5Hr1G061480	157.163	-1.10439	0.181179	-6.09558	1.09044e-09	6.91161e-09
HORVU5Hr1G061660	28.4644	-2.80385	0.467395	-5.99889	1.98667e-09	1.23319e-08
HORVU5Hr1G061730	875.871	-1.8766	0.100985	-18.583	4.41041e-77	1.51713e-75
HORVU5Hr1G061860	2.66856	4.59081	1.53049	2.99958	0.00270354	0.0079369
HORVU5Hr1G061930	518.772	3.61264	0.134691	26.8216	1.80854e-158	1.29032e-156
HORVU5Hr1G061950	442.964	3.26528	0.157855	20.6853	4.70081e-95	1.96499e-93
HORVU5Hr1G062300	151.815	4.25185	0.275786	15.4172	1.25451e-53	3.12157e-52
HORVU5Hr1G062410	5238.37	2.7811	0.0565439	49.1848	0	0
HORVU5Hr1G062860	48.021	4.00192	0.4549	8.79736	1.40071e-18	1.45982e-17
HORVU5Hr1G063330	3.00246	5.73877	1.49885	3.82879	0.000128775	0.000474763
HORVU5Hr1G063340	856.912	2.87221	0.0896183	32.0494	2.23608e-225	2.779e-223
HORVU5Hr1G063390	42.7757	1.42254	0.344593	4.12817	3.65661e-05	0.000146264
HORVU5Hr1G063440	170.766	1.82221	0.181738	10.0266	1.16453e-23	1.47989e-22
HORVU5Hr1G063510	61.0945	1.64464	0.309928	5.30652	1.11738e-07	5.95825e-07
HORVU5Hr1G063540	38.1049	1.812	0.362724	4.99554	5.867e-07	2.90784e-06
HORVU5Hr1G063570	21.5997	2.10443	0.59258	3.5513	0.000383328	0.00131782
HORVU5Hr1G063610	5.89127	2.39004	0.947583	2.52225	0.0116608	0.0296472
HORVU5Hr1G063650	73.3018	1.73286	0.240483	7.20575	5.77255e-13	4.51721e-12
HORVU5Hr1G063870	22.3508	-1.07361	0.458895	-2.33956	0.0193067	0.0463249
HORVU5Hr1G064020	4653.87	1.9961	0.0621744	32.1049	3.76529e-226	4.70478e-224
HORVU5Hr1G064230	124.932	-1.96314	0.227499	-8.62922	6.17723e-18	6.24641e-17
HORVU5Hr1G064690	5.85838	2.69468	1.14148	2.3607	0.0182406	0.044032
HORVU5Hr1G065370	110.094	2.81876	0.229687	12.2722	1.27776e-34	2.20753e-33
HORVU5Hr1G065420	99.1881	2.49341	0.292035	8.53804	1.36517e-17	1.35439e-16
HORVU5Hr1G065520	1885.86	3.39693	0.0741229	45.8283	0	0
HORVU5Hr1G065620	7576.47	2.05124	0.0502201	40.845	0	0
HORVU5Hr1G066260	1819.3	3.95991	0.101916	38.8545	0	0
HORVU5Hr1G066360	1535.41	1.25193	0.076303	16.4074	1.69327e-60	4.71586e-59
HORVU5Hr1G066720	39.678	-4.15598	0.589829	-7.04608	1.84032e-12	1.39753e-11
HORVU5Hr1G066750	406.872	1.06538	0.123134	8.65217	5.05274e-18	5.14307e-17
HORVU5Hr1G066850	9.21946	1.85543	0.718575	2.5821	0.00982018	0.0254659
HORVU5Hr1G066860	11.4089	2.84997	0.92872	3.06871	0.00214987	0.00643985
HORVU5Hr1G066920	120.646	2.86631	0.289541	9.89951	4.18338e-23	5.22155e-22
HORVU5Hr1G066950	60.9336	3.17203	0.364055	8.71304	2.95836e-18	3.038e-17
HORVU5Hr1G067010	390.199	2.05265	0.124197	16.5274	2.33047e-61	6.56966e-60
HORVU5Hr1G067360	19.8981	-1.70769	0.503526	-3.39146	0.000695209	0.00229381
HORVU5Hr1G067390	53.6821	-1.1505	0.304098	-3.7833	0.00015476	0.000564441
HORVU5Hr1G067490	1587.22	-1.22473	0.0753229	-16.2598	1.90391e-59	5.18385e-58
HORVU5Hr1G067500	1.65303	4.4461	1.85777	2.39325	0.0166999	0.040721
HORVU5Hr1G067750	212.244	2.33371	0.157526	14.8147	1.17643e-49	2.75526e-48
HORVU5Hr1G067760	148.45	-3.84463	0.28635	-13.4264	4.23763e-41	8.31554e-40
HORVU5Hr1G067800	974.998	1.14653	0.0896433	12.7899	1.8669e-37	3.42775e-36
HORVU5Hr1G068070	147.484	1.62037	0.179194	9.04254	1.53076e-19	1.67068e-18
HORVU5Hr1G068110	262.014	4.86513	0.245878	19.7868	3.8683e-87	1.48046e-85
HORVU5Hr1G068200	152.947	-1.22851	0.148563	-8.2693	1.34751e-16	1.27294e-15
HORVU5Hr1G068320	1586.48	1.20653	0.0612434	19.7006	2.12975e-86	8.05748e-85
HORVU5Hr1G068330	249.024	1.14401	0.14091	8.11869	4.71225e-16	4.35365e-15
HORVU5Hr1G068350	14.9647	3.84928	1.38278	2.78373	0.00537375	0.0148021
HORVU5Hr1G068860	12.0264	5.63531	1.6003	3.52141	0.000429257	0.00146461
ENSRNA050015356	51.8952	3.99568	1.16833	3.41999	0.000626235	0.00208258
HORVU5Hr1G069690	10.3335	2.00245	0.72601	2.75816	0.00581282	0.0158942
HORVU5Hr1G069750	100.962	1.93242	0.211279	9.14627	5.89345e-20	6.51833e-19
HORVU5Hr1G069980	218.229	2.46235	0.16362	15.0492	3.49498e-51	8.45083e-50
HORVU5Hr1G070360	21.0238	5.54035	0.739821	7.48878	6.95181e-14	5.7536e-13
HORVU5Hr1G070400	20.8784	-2.28032	0.597411	-3.817	0.000135083	0.000497146
HORVU5Hr1G070740	1307.23	-1.09577	0.0544808	-20.1129	5.68694e-90	2.23191e-88
HORVU5Hr1G071020	19.5364	-1.45051	0.508554	-2.85223	0.0043413	0.0122189
HORVU5Hr1G071140	2905.28	1.05162	0.0656283	16.0238	8.70957e-58	2.30619e-56
HORVU5Hr1G071270	878.914	1.84371	0.0823363	22.3925	4.66124e-111	2.28767e-109
HORVU5Hr1G071510	7.52592	-2.67082	0.955265	-2.79589	0.00517573	0.0143181
HORVU5Hr1G072370	16.0496	1.7366	0.569163	3.05115	0.00227969	0.00679613
HORVU5Hr1G072480	3871.36	2.17069	0.0514097	42.2234	0	0
HORVU5Hr1G072540	93.9343	1.69301	0.213788	7.91914	2.39165e-15	2.13375e-14
HORVU5Hr1G072760	14.2543	2.16221	0.542732	3.98394	6.77832e-05	0.000260149
HORVU5Hr1G072770	1918.79	6.33864	0.14195	44.654	0	0
HORVU5Hr1G072780	687.099	3.35116	0.10767	31.1244	1.1265e-212	1.27648e-210
HORVU5Hr1G072920	3967.24	2.27056	0.0543	41.8152	0	0
HORVU5Hr1G073440	47.9162	1.30165	0.267604	4.86411	1.14974e-06	5.53581e-06
HORVU5Hr1G073570	26.0862	6.24019	0.925019	6.74601	1.51964e-11	1.09161e-10
HORVU5Hr1G073720	46.5166	-1.0875	0.338049	-3.21697	0.00129551	0.00406669
HORVU5Hr1G073740	52.0661	1.03755	0.278351	3.72748	0.000193407	0.000694654
HORVU5Hr1G073970	367.028	-1.15749	0.121732	-9.5085	1.93424e-21	2.26964e-20
HORVU5Hr1G074020	13.2895	-5.22054	1.28314	-4.06855	4.73058e-05	0.000186005
HORVU5Hr1G074030	34.9136	-1.74547	0.414826	-4.20772	2.57963e-05	0.000105411
HORVU5Hr1G074110	250.303	1.57688	0.19386	8.13415	4.14837e-16	3.84036e-15
HORVU5Hr1G074260	72.6383	1.21876	0.249257	4.88958	1.0105e-06	4.88984e-06
HORVU5Hr1G074590	6.94032	1.94252	0.788451	2.46372	0.0137505	0.0343369
HORVU5Hr1G075050	372.378	2.17292	0.132582	16.3892	2.28307e-60	6.35083e-59
HORVU5Hr1G075060	38.1121	2.0289	0.372202	5.45106	5.0071e-08	2.77032e-07
HORVU5Hr1G075300	2.59387	4.11481	1.52541	2.69752	0.00698579	0.0187488
HORVU5Hr1G075510	54.207	1.99849	0.329755	6.06053	1.35675e-09	8.53775e-09
HORVU5Hr1G075570	56.6619	-1.4346	0.304715	-4.70799	2.50173e-06	1.16054e-05
HORVU5Hr1G075660	218.015	-1.975	0.133498	-14.7943	1.59441e-49	3.72663e-48
HORVU5Hr1G076100	1211.62	-1.80006	0.0678971	-26.5115	7.13533e-155	5.01338e-153
HORVU5Hr1G076250	1597.85	2.25402	0.0683072	32.9982	8.61278e-239	1.21398e-236
HORVU5Hr1G076410	81.0988	3.74743	0.409293	9.15585	5.3933e-20	5.97658e-19
HORVU5Hr1G076430	38.7913	4.69758	0.556019	8.44859	2.94831e-17	2.87566e-16
HORVU5Hr1G076510	27.3615	6.90394	1.22621	5.6303	1.79894e-08	1.0334e-07
HORVU5Hr1G077010	1529.69	1.15319	0.0720238	16.0112	1.06679e-57	2.82149e-56
HORVU5Hr1G077070	12.1527	1.92451	0.585664	3.28604	0.00101608	0.00324965
ENSRNA049478755	22.3678	-1.71128	0.435412	-3.93024	8.48607e-05	0.000321528
HORVU5Hr1G077390	37.5181	-1.92268	0.413867	-4.64565	3.39002e-06	1.54838e-05
HORVU5Hr1G077430	709.212	1.13769	0.0861277	13.2093	7.7528e-40	1.48233e-38
HORVU5Hr1G077450	42.6892	1.64337	0.310026	5.30074	1.15334e-07	6.13734e-07
HORVU5Hr1G077570	137.31	-1.05581	0.158926	-6.64342	3.06477e-11	2.1586e-10
HORVU5Hr1G077580	18.7809	1.66237	0.492507	3.37533	0.000737266	0.00242014
HORVU5Hr1G077700	122.697	2.01934	0.180099	11.2124	3.54578e-29	5.32928e-28
HORVU5Hr1G078030	17.6738	1.21327	0.474362	2.55768	0.0105374	0.0270707
HORVU5Hr1G078100	99.3126	1.99092	0.252205	7.89406	2.92521e-15	2.60073e-14
HORVU5Hr1G078630	170.267	1.25621	0.161743	7.76672	8.05435e-15	7.0126e-14
ENSRNA050015196	237.669	2.87128	0.849479	3.38005	0.000724736	0.00238239
HORVU5Hr1G078800	29.2707	3.21011	0.468505	6.85183	7.29133e-12	5.35238e-11
HORVU5Hr1G078950	3379.23	3.83448	0.0710363	53.9791	0	0
HORVU5Hr1G079610	5.12588	5.2176	1.40636	3.71	0.000207262	0.000741194
HORVU5Hr1G079670	294.273	1.95262	0.125397	15.5715	1.13657e-54	2.88397e-53
HORVU5Hr1G079940	5.59875	2.2761	0.934551	2.4355	0.0148711	0.0368092
HORVU5Hr1G080030	19.4336	-1.09305	0.440112	-2.48357	0.0130071	0.0326996
HORVU5Hr1G080090	27.5937	-3.81492	0.640943	-5.95204	2.64815e-09	1.62978e-08
HORVU5Hr1G080110	49.0345	-2.16319	0.325795	-6.63973	3.14266e-11	2.21051e-10
HORVU5Hr1G080210	2.00207	-4.60555	1.70026	-2.70872	0.00675424	0.0181801
HORVU5Hr1G080230	40.092	2.78221	0.375574	7.4079	1.28319e-13	1.04481e-12
HORVU5Hr1G080250	11.2386	-3.29916	0.744815	-4.4295	9.44517e-06	4.09557e-05
HORVU5Hr1G080300	538.12	1.52252	0.117291	12.9808	1.57313e-38	2.95406e-37
HORVU5Hr1G080350	31.628	4.54921	0.559833	8.12602	4.43612e-16	4.10017e-15
HORVU5Hr1G080420	50.1867	7.81898	1.04377	7.4911	6.82977e-14	5.65664e-13
HORVU5Hr1G080430	6.67333	6.47826	1.36073	4.76089	1.92743e-06	9.05029e-06
HORVU5Hr1G080450	824.053	5.63634	0.158562	35.5467	9.3537e-277	1.63803e-274
HORVU5Hr1G080500	211.633	2.54337	0.158578	16.0386	6.87204e-58	1.82381e-56
HORVU5Hr1G080530	339.07	1.05489	0.121201	8.70364	3.21392e-18	3.29313e-17
HORVU5Hr1G080820	6.60946	3.10773	1.26176	2.46302	0.0137771	0.0343996
HORVU5Hr1G081310	414.22	1.1896	0.112513	10.573	3.97656e-26	5.44563e-25
HORVU5Hr1G081450	11.7324	3.36856	0.796729	4.22798	2.35798e-05	9.70047e-05
HORVU5Hr1G081840	1134.39	1.99597	0.082526	24.186	3.12513e-129	1.80151e-127
HORVU5Hr1G081860	3516.62	2.13252	0.0729093	29.2489	4.63913e-188	4.23867e-186
HORVU5Hr1G081950	264.704	1.38578	0.162028	8.5527	1.20245e-17	1.19706e-16
HORVU5Hr1G082310	727.046	4.59892	0.128499	35.7896	1.60406e-280	2.91963e-278
HORVU5Hr1G082460	43.1833	-1.02456	0.279943	-3.65989	0.000252324	0.000892264
HORVU5Hr1G083090	5.4758	-6.31929	1.42345	-4.43942	9.02025e-06	3.92161e-05
HORVU5Hr1G083110	81.1885	1.99522	0.2493	8.00327	1.21159e-15	1.09574e-14
HORVU5Hr1G083210	3102.68	1.88811	0.053063	35.5825	2.61266e-277	4.6457e-275
HORVU5Hr1G083240	12.9972	-2.66143	0.65423	-4.06803	4.74115e-05	0.000186389
HORVU5Hr1G083340	100.298	-4.52713	0.364411	-12.4232	1.95696e-35	3.43747e-34
HORVU5Hr1G084100	3147.46	1.99277	0.0667749	29.8431	1.07824e-195	1.06062e-193
HORVU5Hr1G084190	4.17791	4.28768	1.51095	2.83773	0.00454355	0.0127369
HORVU5Hr1G084210	145.868	-1.05614	0.186207	-5.67188	1.41242e-08	8.18489e-08
HORVU5Hr1G084700	147.939	2.18425	0.190631	11.458	2.14426e-30	3.3311e-29
HORVU5Hr1G084860	109.132	1.02295	0.205249	4.98395	6.22991e-07	3.08308e-06
HORVU5Hr1G084880	108.98	1.21513	0.212382	5.72144	1.05622e-08	6.18828e-08
HORVU5Hr1G084980	115.239	1.61611	0.190565	8.48061	2.2402e-17	2.19892e-16
HORVU5Hr1G085020	180.637	1.36688	0.141232	9.67822	3.7314e-22	4.50418e-21
HORVU5Hr1G085510	13.5352	-3.34232	0.670893	-4.9819	6.29633e-07	3.11395e-06
HORVU5Hr1G085800	21.8561	-1.68759	0.525241	-3.21298	0.00131365	0.00411859
HORVU5Hr1G086370	11.7406	-2.08401	0.711312	-2.92981	0.00339172	0.0097383
HORVU5Hr1G086620	492.786	1.12597	0.0953365	11.8105	3.44667e-32	5.60685e-31
HORVU5Hr1G086670	1490.54	-1.15216	0.0669176	-17.2176	1.96005e-66	5.90724e-65
HORVU5Hr1G086710	2224.84	-1.65678	0.0574935	-28.8169	1.31778e-182	1.16266e-180
HORVU5Hr1G087210	103.091	-1.75072	0.211342	-8.28386	1.19249e-16	1.12927e-15
HORVU5Hr1G087240	62.8558	2.1927	0.268773	8.1582	3.40054e-16	3.15817e-15
HORVU5Hr1G087420	36.8155	2.8494	0.405434	7.02801	2.09504e-12	1.58524e-11
HORVU5Hr1G087440	2.45142	4.02444	1.64778	2.44234	0.0145924	0.036189
HORVU5Hr1G087730	266.88	-4.94792	0.310379	-15.9415	3.26322e-57	8.53309e-56
HORVU5Hr1G087760	1.95487	-4.727	1.65945	-2.84854	0.00439205	0.0123422
HORVU5Hr1G087780	520.513	2.53114	0.101389	24.9646	1.48215e-137	9.06384e-136
HORVU5Hr1G087830	56.2079	1.37424	0.261326	5.25873	1.45052e-07	7.6553e-07
HORVU5Hr1G087880	631.896	3.47596	0.121267	28.6637	1.08081e-180	9.35731e-179
HORVU5Hr1G088130	184.865	1.79686	0.152605	11.7746	5.27614e-32	8.55882e-31
HORVU5Hr1G088770	333.428	1.14062	0.135878	8.39445	4.68068e-17	4.52903e-16
HORVU5Hr1G089230	133.023	-1.48796	0.19565	-7.60519	2.84478e-14	2.41143e-13
HORVU5Hr1G089620	1538.38	2.81228	0.0927538	30.3198	6.28265e-202	6.39779e-200
HORVU5Hr1G089740	15.5108	2.24288	0.532678	4.21058	2.5472e-05	0.00010414
HORVU5Hr1G091820	22.6069	-1.05217	0.414967	-2.53555	0.0112271	0.0286546
HORVU5Hr1G091840	27.2112	-1.6768	0.340707	-4.92153	8.58687e-07	4.19029e-06
HORVU5Hr1G091920	100.605	1.25877	0.208944	6.02445	1.6969e-09	1.06072e-08
HORVU5Hr1G092770	84.8722	1.18176	0.274896	4.29893	1.71624e-05	7.17668e-05
HORVU5Hr1G092850	22.8052	2.08534	0.530656	3.92973	8.50405e-05	0.000322103
HORVU5Hr1G093040	9.82831	1.86755	0.577669	3.2329	0.00122539	0.0038644
HORVU5Hr1G093090	8.79656	2.40874	0.669457	3.59805	0.000320617	0.00111819
HORVU5Hr1G093250	7.49792	6.19776	1.33267	4.65065	3.30893e-06	1.51254e-05
HORVU5Hr1G093310	6212.94	-1.02936	0.046151	-22.3042	3.36772e-110	1.64237e-108
HORVU5Hr1G093350	248.915	1.74211	0.153554	11.3453	7.82525e-30	1.19398e-28
HORVU5Hr1G093410	11.671	-3.39746	0.809184	-4.19862	2.68549e-05	0.000109485
HORVU5Hr1G093460	98.3595	2.00095	0.216509	9.24187	2.42216e-20	2.72063e-19
HORVU5Hr1G093640	28.0639	2.24144	0.401303	5.58542	2.33136e-08	1.32935e-07
HORVU5Hr1G093860	354.831	3.36837	0.148407	22.6969	4.81087e-114	2.43877e-112
HORVU5Hr1G093960	850.014	1.08991	0.107907	10.1004	5.4999e-24	7.0631e-23
HORVU5Hr1G093970	395.365	1.37402	0.132353	10.3815	3.0099e-25	4.01714e-24
HORVU5Hr1G094100	65.5556	1.27606	0.272956	4.67498	2.93985e-06	1.3532e-05
HORVU5Hr1G094220	72.2982	-1.10907	0.266805	-4.15688	3.22624e-05	0.000130062
HORVU5Hr1G094270	51.737	-1.15116	0.277717	-4.14506	3.39724e-05	0.000136623
HORVU5Hr1G094380	39.1776	3.43283	0.408644	8.40054	4.44449e-17	4.30951e-16
HORVU5Hr1G094690	4.22601	6.35349	1.50616	4.21835	2.46094e-05	0.000100917
HORVU5Hr1G094700	434.373	3.04907	0.132165	23.0702	9.23266e-118	4.87265e-116
HORVU5Hr1G094710	123.973	3.0234	0.216587	13.9593	2.76172e-44	5.87303e-43
HORVU5Hr1G094740	1.5822	4.59911	1.91796	2.39792	0.0164884	0.0402816
HORVU5Hr1G094750	6.45811	5.2441	1.33513	3.92778	8.57321e-05	0.000324617
HORVU5Hr1G095460	2375.97	-1.64649	0.0596934	-27.5824	1.80969e-167	1.39909e-165
HORVU5Hr1G095590	5.34012	2.22329	0.906395	2.4529	0.0141711	0.035269
HORVU5Hr1G096000	27.5968	1.93849	0.43733	4.43256	9.31189e-06	4.04156e-05
HORVU5Hr1G096210	737.789	1.43973	0.0916449	15.7098	1.29516e-55	3.33767e-54
HORVU5Hr1G096320	1.60819	-4.43697	1.8919	-2.34525	0.0190145	0.0457091
HORVU5Hr1G096360	728.394	-2.75032	0.09625	-28.5748	1.38327e-179	1.17992e-177
HORVU5Hr1G096370	4784.18	3.38287	0.0499832	67.6802	0	0
HORVU5Hr1G096420	100.729	2.11105	0.200885	10.5088	7.87255e-26	1.06609e-24
HORVU5Hr1G096480	422.535	-2.09909	0.119926	-17.5032	1.35473e-68	4.18661e-67
HORVU5Hr1G096830	20.9848	-2.87139	0.507419	-5.65883	1.52413e-08	8.81454e-08
HORVU5Hr1G096900	3.35909	6.16126	1.46558	4.20397	2.62277e-05	0.000107079
HORVU5Hr1G097060	1890.39	2.10035	0.0590412	35.5744	3.48726e-277	6.15355e-275
HORVU5Hr1G097150	237.228	1.70652	0.150072	11.3713	5.80982e-30	8.88814e-29
HORVU5Hr1G097270	399.013	3.75388	0.146378	25.6451	4.78992e-145	3.13665e-143
HORVU5Hr1G097310	57.9813	2.30838	0.356703	6.47145	9.70699e-11	6.59186e-10
HORVU5Hr1G097320	51.1629	2.92778	0.399018	7.33745	2.1771e-13	1.7456e-12
HORVU5Hr1G097440	486.403	-1.7184	0.112317	-15.2996	7.6982e-53	1.89916e-51
HORVU5Hr1G097500	1527.13	3.19427	0.0754196	42.3532	0	0
HORVU5Hr1G097730	4775.75	-1.78047	0.0533111	-33.3978	1.47679e-244	2.17436e-242
HORVU5Hr1G097740	196.436	-1.77558	0.155472	-11.4206	3.29977e-30	5.08856e-29
HORVU5Hr1G097940	888.882	2.78852	0.0793068	35.1613	7.82416e-271	1.3106e-268
HORVU5Hr1G098030	733.582	3.59011	0.123707	29.0211	3.56876e-185	3.20994e-183
HORVU5Hr1G098090	286.735	1.75211	0.145885	12.0102	3.14065e-33	5.257e-32
HORVU5Hr1G098310	10.4898	2.59214	0.682468	3.79819	0.000145758	0.0005338
HORVU5Hr1G098440	33.4648	1.30845	0.411904	3.17659	0.0014902	0.00461885
HORVU5Hr1G098470	13.0214	-4.04936	0.917855	-4.41176	1.02533e-05	4.42953e-05
HORVU5Hr1G098630	13.5819	4.86172	0.936894	5.18919	2.11216e-07	1.0957e-06
HORVU5Hr1G098640	665.36	4.21483	0.108795	38.7409	0	0
HORVU5Hr1G098710	14.1414	7.24784	1.25962	5.75398	8.71655e-09	5.13355e-08
HORVU5Hr1G098720	1640.98	3.1496	0.070447	44.7088	0	0
HORVU5Hr1G098770	453.453	1.53002	0.101719	15.0416	3.92013e-51	9.42953e-50
HORVU5Hr1G098920	144.878	2.39615	0.174828	13.7057	9.37935e-43	1.91025e-41
HORVU5Hr1G099180	20.9987	-1.14758	0.462488	-2.48133	0.0130894	0.0328734
HORVU5Hr1G099200	5774.34	-1.1502	0.0357801	-32.1464	9.90751e-227	1.25836e-224
HORVU5Hr1G099330	188.551	2.73769	0.169644	16.1379	1.38175e-58	3.69681e-57
HORVU5Hr1G099460	71.7826	1.57221	0.306235	5.13401	2.83633e-07	1.45376e-06
HORVU5Hr1G099470	76.8647	3.94131	0.287162	13.725	7.18942e-43	1.47071e-41
HORVU5Hr1G099700	286.161	1.04274	0.115143	9.05604	1.35267e-19	1.47771e-18
HORVU5Hr1G099980	4.79013	-3.88168	1.25892	-3.08335	0.00204685	0.00616082
HORVU5Hr1G100180	6.8407	4.66395	1.1763	3.96494	7.34132e-05	0.000280778
HORVU5Hr1G101010	121.188	1.68477	0.250952	6.71354	1.89959e-11	1.35863e-10
HORVU5Hr1G101480	131.131	1.01511	0.163906	6.19322	5.89481e-10	3.80733e-09
HORVU5Hr1G101500	637.417	1.09116	0.116609	9.35743	8.17034e-21	9.3313e-20
HORVU5Hr1G101990	44.2701	-3.36407	0.392953	-8.56101	1.11887e-17	1.11626e-16
HORVU5Hr1G102130	25.1863	2.05848	0.434557	4.73697	2.16933e-06	1.01224e-05
HORVU5Hr1G102190	2.15384	4.34187	1.71621	2.52992	0.011409	0.0290548
HORVU5Hr1G102250	86.2033	-1.31866	0.257319	-5.12462	2.98143e-07	1.52408e-06
HORVU5Hr1G102390	9.31502	-6.14128	1.30128	-4.71941	2.36533e-06	1.0997e-05
HORVU5Hr1G102440	33.7843	-8.11701	1.21764	-6.66619	2.62529e-11	1.85926e-10
HORVU5Hr1G102530	10978.6	-1.80868	0.0387501	-46.6753	0	0
HORVU5Hr1G102620	7020.59	-2.30757	0.036549	-63.1365	0	0
HORVU5Hr1G102900	2427.04	1.95853	0.0657255	29.7986	4.06726e-195	3.95037e-193
HORVU5Hr1G103130	13.3098	7.31065	1.27749	5.72266	1.0487e-08	6.14806e-08
HORVU5Hr1G103420	22.9273	-2.17382	0.5116	-4.24907	2.1466e-05	8.87193e-05
HORVU5Hr1G103450	41.3537	-1.25232	0.359922	-3.47943	0.000502491	0.00169645
HORVU5Hr1G103590	1075.57	3.55333	0.10881	32.6563	6.51938e-234	8.91728e-232
HORVU5Hr1G103600	1046.98	1.10173	0.0626285	17.5916	2.8589e-69	8.94268e-68
HORVU5Hr1G103620	348.201	2.78858	0.13752	20.2777	2.02477e-91	8.04203e-90
HORVU5Hr1G103670	31.4233	1.9377	0.383459	5.05321	4.34445e-07	2.18271e-06
HORVU5Hr1G103770	165.3	-1.63855	0.17122	-9.56985	1.07059e-21	1.26393e-20
HORVU5Hr1G103820	63.6925	3.13089	0.282186	11.0951	1.32458e-28	1.95899e-27
HORVU5Hr1G103870	22.4667	-1.8428	0.466892	-3.94696	7.91502e-05	0.000301125
HORVU5Hr1G103990	343.62	3.52574	0.145372	24.2532	6.1193e-130	3.5452e-128
HORVU5Hr1G104620	108.662	1.74581	0.251627	6.9381	3.97417e-12	2.95772e-11
HORVU5Hr1G104670	77.3523	2.00968	0.270923	7.41789	1.19003e-13	9.7307e-13
HORVU5Hr1G104740	14.4545	-1.42618	0.544653	-2.61851	0.00883138	0.023159
HORVU5Hr1G104800	186.362	2.44706	0.193614	12.6389	1.28918e-36	2.31552e-35
HORVU5Hr1G105030	1014.02	-1.48216	0.0730052	-20.3021	1.23252e-91	4.91224e-90
HORVU5Hr1G105410	244.562	-2.37014	0.148902	-15.9174	4.79668e-57	1.25288e-55
HORVU5Hr1G105930	58.1168	3.75872	0.369862	10.1625	2.91507e-24	3.78566e-23
HORVU5Hr1G106010	3238.74	1.17735	0.0877196	13.4217	4.51303e-41	8.84844e-40
HORVU5Hr1G106020	19.8276	-4.86802	0.921302	-5.28385	1.26497e-07	6.70205e-07
HORVU5Hr1G106110	388.659	-2.28615	0.108958	-20.982	9.5771e-98	4.11495e-96
HORVU5Hr1G106350	104.056	4.48307	0.259279	17.2905	5.54593e-67	1.68021e-65
HORVU5Hr1G106370	144.939	2.12865	0.169531	12.5561	3.67906e-36	6.54697e-35
HORVU5Hr1G106550	817.879	2.68972	0.0946567	28.4156	1.29824e-177	1.09526e-175
HORVU5Hr1G106610	3875	1.54034	0.0510199	30.1909	3.11621e-200	3.13192e-198
HORVU5Hr1G106640	184.873	-4.94962	0.368909	-13.4169	4.81287e-41	9.42834e-40
HORVU5Hr1G107290	563.01	2.91251	0.104107	27.9761	3.17383e-172	2.56525e-170
HORVU5Hr1G108640	205.423	-1.85274	0.151121	-12.26	1.4845e-34	2.56088e-33
HORVU5Hr1G108670	453.678	4.24558	0.134345	31.6021	3.45441e-219	4.11609e-217
HORVU5Hr1G109190	1083.99	2.5507	0.111706	22.834	2.10982e-115	1.079e-113
HORVU5Hr1G109290	1471.46	1.29445	0.0765731	16.9048	4.14584e-64	1.21629e-62
ENSRNA049480416	1.92768	4.42438	1.74769	2.53156	0.0113555	0.0289363
HORVU5Hr1G110000	5458.27	-1.79815	0.0658113	-27.3228	2.27293e-164	1.70036e-162
HORVU5Hr1G110180	931.598	2.42544	0.0926378	26.182	4.264e-151	2.91617e-149
HORVU5Hr1G110220	124.485	3.10076	0.234124	13.2441	4.87905e-40	9.39868e-39
HORVU5Hr1G110300	14.884	3.07586	0.586284	5.24637	1.55128e-07	8.15544e-07
HORVU5Hr1G110440	56.0731	3.64403	0.33865	10.7605	5.29037e-27	7.42966e-26
HORVU5Hr1G110490	27.1718	-1.22628	0.372911	-3.28841	0.00100756	0.00322543
HORVU5Hr1G110680	5.5498	4.15144	1.10145	3.76907	0.000163857	0.000595554
HORVU5Hr1G110890	121.167	2.91221	0.212004	13.7366	6.13063e-43	1.25523e-41
HORVU5Hr1G110900	899.2	1.04281	0.073691	14.1512	1.83688e-45	3.99824e-44
HORVU5Hr1G110920	269.056	1.16487	0.109712	10.6175	2.47101e-26	3.41014e-25
HORVU5Hr1G110940	194.36	2.11163	0.147208	14.3446	1.15177e-46	2.55756e-45
HORVU5Hr1G111000	169.447	1.97813	0.158602	12.4723	1.05757e-35	1.87763e-34
HORVU5Hr1G111120	2657.93	1.01674	0.07764	13.0956	3.48905e-39	6.6272e-38
HORVU5Hr1G111130	130.045	1.12317	0.195538	5.74401	9.24603e-09	5.43707e-08
HORVU5Hr1G111520	151.031	1.87229	0.189815	9.86378	5.97555e-23	7.4224e-22
HORVU5Hr1G111870	9719.82	1.78003	0.0361249	49.2743	0	0
HORVU5Hr1G112040	17.851	1.53859	0.426825	3.60473	0.000312481	0.00109245
HORVU5Hr1G112060	55.3204	-3.66868	0.56037	-6.5469	5.87433e-11	4.04863e-10
HORVU5Hr1G112100	232.754	2.05845	0.152189	13.5256	1.10494e-41	2.1981e-40
HORVU5Hr1G112110	74.4772	2.44088	0.279573	8.73074	2.53016e-18	2.6087e-17
HORVU5Hr1G112210	783.276	1.95076	0.0849742	22.9571	1.25207e-116	6.48944e-115
HORVU5Hr1G112610	225.009	-1.4282	0.159691	-8.94352	3.76964e-19	4.03235e-18
HORVU5Hr1G112630	117.89	-1.16245	0.200043	-5.81103	6.20912e-09	3.69162e-08
HORVU5Hr1G112710	782.891	1.1636	0.0840726	13.8404	1.45334e-43	3.03209e-42
HORVU5Hr1G112900	116.368	1.41522	0.229487	6.16688	6.9652e-10	4.47243e-09
HORVU5Hr1G112960	17.4694	1.34428	0.512793	2.62149	0.00875455	0.0229783
HORVU5Hr1G113040	51.4645	-1.35596	0.313941	-4.31917	1.5662e-05	6.5898e-05
HORVU5Hr1G113070	3.68479	5.37264	1.40087	3.83521	0.000125455	0.000463131
HORVU5Hr1G113230	1.42254	4.09941	1.76357	2.32449	0.020099	0.0479917
HORVU5Hr1G113240	722.401	2.05519	0.0906706	22.6665	9.58405e-114	4.84781e-112
HORVU5Hr1G113290	7.15239	4.32319	1.07109	4.03625	5.43133e-05	0.000211716
HORVU5Hr1G113450	3.24085	5.80583	1.56414	3.71183	0.000205768	0.000736421
HORVU5Hr1G113500	31.3173	1.53946	0.34011	4.52635	6.001e-06	2.67333e-05
HORVU5Hr1G113580	23.3108	2.42778	0.479599	5.0621	4.14653e-07	2.08963e-06
HORVU5Hr1G113970	211.548	-1.18825	0.146648	-8.1027	5.37529e-16	4.95238e-15
HORVU5Hr1G114030	73.774	1.33973	0.237487	5.64129	1.68785e-08	9.73219e-08
HORVU5Hr1G114230	4847.42	-2.28851	0.064787	-35.3236	2.54819e-273	4.36326e-271
HORVU5Hr1G114260	2.89655	4.66189	1.47208	3.16688	0.00154085	0.00475608
HORVU5Hr1G114400	23.7429	-3.21374	0.559073	-5.74833	9.01297e-09	5.30272e-08
HORVU5Hr1G114500	290.41	1.01473	0.116055	8.74355	2.25892e-18	2.33529e-17
HORVU5Hr1G114530	4.30539	6.99847	1.49656	4.67636	2.92008e-06	1.3457e-05
HORVU5Hr1G114540	1993.98	1.16045	0.0535951	21.6522	5.79255e-104	2.67267e-102
HORVU5Hr1G114700	729.275	1.58775	0.0848452	18.7135	3.84532e-78	1.33667e-76
HORVU5Hr1G114920	430.24	1.22892	0.106583	11.5301	9.2989e-31	1.46028e-29
HORVU5Hr1G115230	4234.25	1.14404	0.0549435	20.8222	2.72626e-96	1.15422e-94
HORVU5Hr1G115240	145.092	1.25888	0.170469	7.38481	1.52672e-13	1.2357e-12
HORVU5Hr1G115250	68.6954	1.75428	0.272608	6.43519	1.23315e-10	8.32035e-10
HORVU5Hr1G115750	71.9659	2.30216	0.237446	9.6955	3.15095e-22	3.82549e-21
HORVU5Hr1G115780	19.5568	-3.61588	0.68002	-5.31731	1.05312e-07	5.64562e-07
HORVU5Hr1G115800	14.3962	-1.24607	0.526046	-2.36875	0.0178483	0.0431797
HORVU5Hr1G115870	677.602	3.89995	0.123568	31.5612	1.25942e-218	1.47781e-216
HORVU5Hr1G115880	6.84937	4.92582	1.23842	3.97749	6.96471e-05	0.000266904
HORVU5Hr1G116290	20.8519	8.73894	1.22404	7.13943	9.37167e-13	7.23807e-12
HORVU5Hr1G116590	9.61531	1.75204	0.607348	2.88474	0.00391734	0.0111204
HORVU5Hr1G116610	52.3416	-1.26108	0.312422	-4.03645	5.42667e-05	0.000211575
HORVU5Hr1G116660	86.6071	-1.26179	0.249583	-5.05561	4.29017e-07	2.15787e-06
HORVU5Hr1G116750	49.4793	-1.12915	0.330015	-3.42151	0.000622741	0.00207186
HORVU5Hr1G116770	3.32874	3.7365	1.31208	2.84776	0.00440276	0.0123708
HORVU5Hr1G117610	57.1793	1.52044	0.23804	6.38732	1.68815e-10	1.13196e-09
HORVU5Hr1G117670	24.5682	1.02626	0.41548	2.47005	0.0135093	0.0338003
HORVU5Hr1G117710	311.356	1.19411	0.112898	10.5769	3.81317e-26	5.22807e-25
HORVU5Hr1G117780	6.49032	2.52057	0.979253	2.57397	0.0100538	0.0259755
HORVU5Hr1G117800	85.3367	-1.49412	0.26422	-5.65483	1.56005e-08	9.01779e-08
HORVU5Hr1G117830	3024.83	-1.12006	0.0600191	-18.6618	1.0126e-77	3.50407e-76
HORVU5Hr1G117910	2866.83	1.55741	0.0786342	19.8058	2.65235e-87	1.02016e-85
HORVU5Hr1G118010	575.175	1.4563	0.107459	13.5522	7.68814e-42	1.53736e-40
HORVU5Hr1G118020	64.0743	1.79122	0.267839	6.68767	2.26746e-11	1.61176e-10
HORVU5Hr1G118060	169.595	2.39781	0.171868	13.9515	3.08244e-44	6.54905e-43
HORVU5Hr1G118460	3588.86	1.0856	0.069403	15.642	3.76645e-55	9.63111e-54
HORVU5Hr1G118510	1112.31	1.00416	0.0856939	11.718	1.03021e-31	1.65953e-30
HORVU5Hr1G118520	58.2261	1.93228	0.287962	6.71018	1.94379e-11	1.38938e-10
HORVU5Hr1G118590	79.899	3.17869	0.31206	10.1862	2.28619e-24	2.979e-23
HORVU5Hr1G118880	142.68	1.3354	0.155459	8.59004	8.69401e-18	8.71512e-17
HORVU5Hr1G119040	103.056	-2.63105	0.221074	-11.9013	1.16586e-32	1.92638e-31
HORVU5Hr1G119480	5.1319	-4.44799	1.40354	-3.16911	0.00152907	0.00472728
HORVU5Hr1G119490	19.1472	1.05014	0.439912	2.38716	0.0169791	0.0413277
HORVU5Hr1G119500	116.387	-1.59661	0.200632	-7.9579	1.74988e-15	1.56723e-14
HORVU5Hr1G119520	11.2754	-3.16717	0.720139	-4.398	1.09254e-05	4.70194e-05
HORVU5Hr1G119830	460.4	-1.11206	0.0989321	-11.2407	2.57441e-29	3.89209e-28
HORVU5Hr1G120300	71.8142	1.57085	0.263054	5.97156	2.3499e-09	1.45086e-08
HORVU5Hr1G120420	100.702	2.88029	0.246175	11.7002	1.272e-31	2.03908e-30
HORVU5Hr1G120630	78.4242	-1.23294	0.248784	-4.95585	7.20138e-07	3.53809e-06
HORVU5Hr1G120800	307.343	1.36923	0.12721	10.7635	5.11774e-27	7.20035e-26
HORVU5Hr1G120810	95.7086	1.11663	0.205084	5.44474	5.18804e-08	2.86495e-07
HORVU5Hr1G121570	811.503	1.72926	0.0966444	17.893	1.33742e-71	4.36047e-70
HORVU5Hr1G122060	5.38357	5.09181	1.41771	3.59157	0.000328687	0.00114297
HORVU5Hr1G122390	990.028	4.79579	0.108211	44.3187	0	0
HORVU5Hr1G122510	39.6558	1.0602	0.349603	3.03259	0.00242468	0.00718482
HORVU5Hr1G122660	29.9558	1.72554	0.430969	4.00386	6.23186e-05	0.000240413
HORVU5Hr1G122860	22.4205	-1.93466	0.473525	-4.08565	4.39533e-05	0.000173413
HORVU5Hr1G122950	297.451	3.44803	0.162408	21.2306	4.98405e-100	2.19869e-98
HORVU5Hr1G122960	16.4881	2.40282	0.630822	3.80903	0.000139513	0.000512391
HORVU5Hr1G122990	20.3936	2.68084	0.537857	4.9843	6.21855e-07	3.07878e-06
HORVU5Hr1G123050	62.8465	1.1211	0.236092	4.74858	2.04847e-06	9.59134e-06
HORVU5Hr1G123920	260.172	-1.0436	0.115557	-9.03106	1.7001e-19	1.84939e-18
HORVU5Hr1G123970	134.875	-3.79804	0.211279	-17.9764	2.98403e-72	9.79812e-71
HORVU5Hr1G124030	22.7117	-1.16345	0.417448	-2.78706	0.00531886	0.0146772
HORVU5Hr1G124090	211.131	-1.2229	0.153127	-7.98619	1.3917e-15	1.25274e-14
HORVU5Hr1G124120	155.128	-1.3678	0.171931	-7.9555	1.78407e-15	1.596e-14
HORVU5Hr1G124290	2.45702	-5.56564	1.74498	-3.18952	0.00142509	0.00443431
HORVU5Hr1G124390	201.723	1.1537	0.152033	7.58849	3.23655e-14	2.73651e-13
HORVU5Hr1G124590	67.3996	2.67346	0.267874	9.98029	1.85925e-23	2.34598e-22
HORVU5Hr1G124750	5832.31	-1.11314	0.0628048	-17.7238	2.7482e-70	8.71433e-69
HORVU5Hr1G124800	190.197	2.04108	0.175547	11.6269	3.00667e-31	4.76695e-30
HORVU5Hr1G124810	320.125	2.72537	0.154299	17.6629	8.09818e-70	2.55734e-68
HORVU5Hr1G124880	55.5846	-2.47582	0.28891	-8.56952	1.03921e-17	1.03768e-16
HORVU5Hr1G125000	1.72856	-5.6978	1.93765	-2.94057	0.00327614	0.00943574
HORVU5Hr1G125120	190.075	1.72217	0.169641	10.1518	3.25169e-24	4.21099e-23
HORVU5Hr1G125400	12.962	5.09809	0.970191	5.25473	1.48244e-07	7.81724e-07
HORVU5Hr1G125500	14.5091	-1.81251	0.574503	-3.15491	0.00160548	0.00494434
HORVU5Hr1G125780	102.798	3.67492	0.24655	14.9054	3.03985e-50	7.19233e-49
HORVU5Hr1G125800	6.53602	4.49696	1.06909	4.20632	2.59557e-05	0.000106025
HORVU5Hr1G125810	21.0783	3.64517	0.524117	6.95487	3.52881e-12	2.64243e-11
HORVU7Hr1G000530	376.02	3.70963	0.147644	25.1256	2.61305e-139	1.62812e-137
HORVU7Hr1G001040	6.29068	-4.76705	1.36926	-3.48148	0.000498657	0.001684
HORVU7Hr1G001420	39.4063	1.04626	0.306541	3.41312	0.000642235	0.00213242
HORVU7Hr1G001520	59.2695	2.7097	0.315609	8.58563	9.03366e-18	9.05167e-17
HORVU7Hr1G001570	273.531	2.05145	0.150415	13.6385	2.36219e-42	4.76479e-41
HORVU7Hr1G001600	9.54395	1.71407	0.673783	2.54395	0.0109607	0.0280677
HORVU7Hr1G001860	61.402	-1.37154	0.213497	-6.42414	1.32614e-10	8.92435e-10
ENSRNA049489213	18.3998	4.13546	1.0976	3.76772	0.000164743	0.000598302
HORVU7Hr1G002130	2983.96	1.17704	0.0967255	12.1689	4.55033e-34	7.74561e-33
HORVU7Hr1G002360	53.6345	1.74433	0.334808	5.20995	1.88889e-07	9.83413e-07
HORVU7Hr1G002370	154.855	-2.71824	0.222056	-12.2412	1.87171e-34	3.21445e-33
HORVU7Hr1G002390	681.907	2.149	0.0827577	25.9674	1.15758e-148	7.80131e-147
HORVU7Hr1G002720	46.2428	-5.93299	0.873241	-6.79421	1.08905e-11	7.8917e-11
HORVU7Hr1G002740	65.3903	-3.91335	0.375533	-10.4208	1.99339e-25	2.67902e-24
HORVU7Hr1G002820	37.1935	-1.80277	0.418464	-4.30808	1.6468e-05	6.90127e-05
HORVU7Hr1G002920	2.34461	4.85725	1.77488	2.73666	0.00620671	0.0168635
HORVU7Hr1G002960	71.5632	1.3717	0.225959	6.0706	1.27434e-09	8.03539e-09
HORVU7Hr1G003090	105.409	-1.4749	0.188108	-7.84069	4.48068e-15	3.94423e-14
HORVU7Hr1G003630	87.7754	1.56073	0.225761	6.9132	4.73836e-12	3.51064e-11
HORVU7Hr1G005270	2273.32	3.02127	0.0985838	30.6467	2.9201e-206	3.18401e-204
HORVU7Hr1G006590	1579.86	3.44267	0.0847926	40.601	0	0
HORVU7Hr1G007520	2331.2	2.69894	0.0999849	26.9934	1.7646e-160	1.2747e-158
HORVU7Hr1G007540	4728.14	1.94859	0.0553651	35.1952	2.37124e-271	4.00098e-269
HORVU7Hr1G007570	8.81884	2.7067	0.7447	3.63462	0.000278394	0.000979656
HORVU7Hr1G007800	169.747	-3.09731	0.184552	-16.7828	3.26003e-63	9.47909e-62
HORVU7Hr1G007810	61.0764	-2.58637	0.29311	-8.8239	1.10543e-18	1.15573e-17
HORVU7Hr1G008050	393.252	3.73833	0.165237	22.624	2.51407e-113	1.26337e-111
HORVU7Hr1G008140	893.774	1.82031	0.0811647	22.4273	2.13089e-111	1.05251e-109
HORVU7Hr1G008260	75.4759	1.46164	0.22246	6.57036	5.01942e-11	3.47809e-10
HORVU7Hr1G008390	131.153	-1.45325	0.18839	-7.71406	1.21877e-14	1.05202e-13
HORVU7Hr1G008610	170.383	5.45792	0.302289	18.0553	7.1698e-73	2.37446e-71
HORVU7Hr1G008760	925.169	1.6843	0.0766598	21.9711	5.44185e-107	2.56722e-105
HORVU7Hr1G008840	976.925	2.32151	0.0902282	25.7293	5.49616e-146	3.62998e-144
HORVU7Hr1G009350	5.74053	-2.63146	1.03452	-2.54364	0.0109703	0.0280829
HORVU7Hr1G009680	46.2473	2.32492	0.496153	4.68589	2.78747e-06	1.2869e-05
HORVU7Hr1G009940	425.002	1.39736	0.101397	13.781	3.3144e-43	6.84069e-42
HORVU7Hr1G010230	92.3363	-1.12047	0.188102	-5.95672	2.57346e-09	1.58592e-08
HORVU7Hr1G010300	1745.32	1.0141	0.05133	19.7565	7.0558e-87	2.68702e-85
HORVU7Hr1G010320	72.275	3.542	0.2983	11.8739	1.61664e-32	2.65792e-31
HORVU7Hr1G010340	64.0833	1.69986	0.297411	5.71552	1.09368e-08	6.39068e-08
HORVU7Hr1G010430	3.17718	3.96834	1.56426	2.53689	0.0111843	0.0285643
HORVU7Hr1G010510	43.0096	-1.04123	0.295394	-3.52489	0.000423661	0.00144722
HORVU7Hr1G010740	133.74	2.83361	0.201539	14.0598	6.70504e-45	1.44989e-43
HORVU7Hr1G010890	31.5858	-1.4857	0.40994	-3.62418	0.000289877	0.0010182
HORVU7Hr1G011230	1030.87	4.88545	0.119642	40.8338	0	0
HORVU7Hr1G011890	1328.02	-1.07779	0.0691078	-15.5957	7.78078e-55	1.97866e-53
HORVU7Hr1G012300	8.063	3.3776	1.45159	2.32682	0.0199747	0.0477442
HORVU7Hr1G012310	13.1274	1.85072	0.669635	2.76377	0.00571371	0.0156509
HORVU7Hr1G012530	3488.88	2.66188	0.0603384	44.1158	0	0
HORVU7Hr1G012560	534.982	2.56788	0.120348	21.3371	5.13354e-101	2.30421e-99
HORVU7Hr1G012600	54.0878	4.3102	0.464151	9.28621	1.59875e-20	1.80453e-19
HORVU7Hr1G012610	89.8343	1.40154	0.204625	6.84931	7.42055e-12	5.44142e-11
HORVU7Hr1G012680	81.5418	2.12216	0.239476	8.86167	7.88253e-19	8.30883e-18
HORVU7Hr1G012850	150.989	1.0603	0.175191	6.05225	1.42834e-09	8.96728e-09
HORVU7Hr1G013170	861.515	2.07509	0.0831139	24.9668	1.40255e-137	8.59981e-136
HORVU7Hr1G017640	1015.56	-2.75475	0.090211	-30.5368	8.47009e-205	9.06457e-203
HORVU7Hr1G017790	15.2464	2.10219	0.567549	3.70398	0.000212239	0.000758054
HORVU7Hr1G017810	38.673	2.74895	0.359547	7.6456	2.07969e-14	1.77592e-13
HORVU7Hr1G017950	460.677	1.97914	0.102148	19.3752	1.24987e-83	4.63756e-82
HORVU7Hr1G018100	186.719	1.07606	0.147593	7.29071	3.08329e-13	2.44842e-12
HORVU7Hr1G018190	207.415	1.14789	0.126747	9.05657	1.34615e-19	1.47128e-18
HORVU7Hr1G018590	38.1081	2.51143	0.331878	7.56732	3.81002e-14	3.20147e-13
HORVU7Hr1G019240	354.733	2.65336	0.125702	21.1083	6.6723e-99	2.91013e-97
HORVU7Hr1G019260	12.8727	2.22136	0.689496	3.22172	0.00127425	0.00400701
HORVU7Hr1G019280	359.68	2.66741	0.139494	19.1221	1.65464e-81	6.00449e-80
HORVU7Hr1G019380	78.7724	-2.15106	0.280434	-7.67046	1.71387e-14	1.4695e-13
HORVU7Hr1G019390	270.745	1.79812	0.126719	14.1898	1.05943e-45	2.31691e-44
HORVU7Hr1G019890	25.2607	1.58356	0.442112	3.5818	0.000341238	0.00118368
HORVU7Hr1G020830	1.31948	-4.61876	1.98872	-2.32248	0.0202071	0.0482201
HORVU7Hr1G021080	643.426	1.11296	0.0856082	13.0006	1.21329e-38	2.28578e-37
HORVU7Hr1G021260	447.857	4.38242	0.149335	29.3462	2.67122e-189	2.46008e-187
HORVU7Hr1G021620	27.9719	-1.03342	0.434549	-2.37814	0.0174004	0.0422598
HORVU7Hr1G021630	3.98908	3.04843	1.13585	2.68382	0.00727859	0.0194691
HORVU7Hr1G022110	44.2569	1.48497	0.292582	5.07541	3.86663e-07	1.95539e-06
HORVU7Hr1G022310	28.6007	4.20242	0.576317	7.29186	3.05712e-13	2.42847e-12
HORVU7Hr1G022340	67.6339	2.53769	0.267417	9.48961	2.31908e-21	2.70473e-20
HORVU7Hr1G022910	295.649	1.94565	0.120326	16.1699	8.22934e-59	2.21454e-57
HORVU7Hr1G024350	570.976	1.56929	0.0978725	16.034	7.39237e-58	1.95966e-56
HORVU7Hr1G024660	61.0318	3.28634	0.382033	8.60222	7.81883e-18	7.8651e-17
HORVU7Hr1G024670	16612.7	2.07289	0.0379865	54.5691	0	0
HORVU7Hr1G024930	722.442	2.86389	0.102798	27.8594	8.27614e-171	6.59694e-169
HORVU7Hr1G024940	17.8174	2.86761	0.574013	4.99573	5.8614e-07	2.90568e-06
HORVU7Hr1G025230	11.4915	1.67907	0.536108	3.13197	0.00173639	0.0053093
HORVU7Hr1G025670	25.8021	2.15036	0.375241	5.7306	1.00074e-08	5.87134e-08
HORVU7Hr1G025780	36.6663	1.07519	0.297572	3.6132	0.000302437	0.00105894
HORVU7Hr1G026150	13.1239	-1.36982	0.57278	-2.39153	0.0167783	0.0408991
HORVU7Hr1G026300	299.414	1.11669	0.109971	10.1545	3.16547e-24	4.10623e-23
HORVU7Hr1G026570	50.5228	1.38474	0.360151	3.84489	0.000120607	0.000446214
HORVU7Hr1G026650	15.3197	3.60149	0.661637	5.4433	5.23024e-08	2.88756e-07
HORVU7Hr1G026660	3.86137	4.47611	1.28458	3.48449	0.000493075	0.00166677
HORVU7Hr1G026680	112.556	1.74523	0.204311	8.54205	1.31856e-17	1.30871e-16
HORVU7Hr1G026720	12.2704	1.41652	0.50539	2.80283	0.00506569	0.0140423
HORVU7Hr1G027010	1051.03	1.252	0.0701948	17.8361	3.70564e-71	1.2014e-69
HORVU7Hr1G027430	4.31672	-3.96597	1.53097	-2.5905	0.00958369	0.0249085
HORVU7Hr1G027540	37.3659	-2.6673	0.393928	-6.77102	1.27882e-11	9.23497e-11
HORVU7Hr1G027550	8.71484	-1.65033	0.630137	-2.619	0.00881885	0.0231313
HORVU7Hr1G027560	49.6924	2.39016	0.363676	6.57223	4.95659e-11	3.43661e-10
HORVU7Hr1G027740	9.36572	1.93551	0.746786	2.59179	0.0095478	0.0248292
HORVU7Hr1G027770	263.406	1.71288	0.130874	13.088	3.85394e-39	7.31425e-38
HORVU7Hr1G027810	85.5605	-1.3797	0.239856	-5.7522	8.80904e-09	5.1867e-08
HORVU7Hr1G027860	510.776	-1.30968	0.130188	-10.0599	8.30778e-24	1.06101e-22
HORVU7Hr1G028370	1160.71	2.14829	0.0836838	25.6715	2.43489e-145	1.599e-143
HORVU7Hr1G028520	19.9291	2.52936	0.569687	4.43992	8.99932e-06	3.91472e-05
HORVU7Hr1G028730	416.133	2.17737	0.115081	18.9203	7.75903e-80	2.75511e-78
HORVU7Hr1G028840	428.063	1.59886	0.0938365	17.0388	4.23061e-65	1.26187e-63
HORVU7Hr1G029260	4.80418	-4.87315	1.38577	-3.51655	0.000437192	0.00149036
HORVU7Hr1G029420	280.75	1.39025	0.117553	11.8266	2.84568e-32	4.64553e-31
HORVU7Hr1G029720	1320.52	2.46463	0.0894673	27.5478	4.69922e-167	3.58506e-165
HORVU7Hr1G029920	53.2164	2.25106	0.299712	7.51074	5.87943e-14	4.89057e-13
HORVU7Hr1G030080	169.127	1.4784	0.153717	9.61768	6.73322e-22	8.03952e-21
HORVU7Hr1G030370	19.9569	-1.44886	0.571018	-2.53732	0.0111704	0.0285352
HORVU7Hr1G030460	32.3886	3.07284	0.445848	6.89212	5.49655e-12	4.05418e-11
HORVU7Hr1G031430	223.635	2.73537	0.149598	18.2848	1.09366e-74	3.66923e-73
HORVU7Hr1G031650	59.0383	3.6188	0.363806	9.94704	2.59793e-23	3.26202e-22
HORVU7Hr1G031680	4.28431	4.47905	1.451	3.08686	0.00202281	0.0060948
HORVU7Hr1G031810	8.20156	-1.55337	0.65935	-2.35591	0.0184772	0.0445334
HORVU7Hr1G032140	12.5538	1.3779	0.547197	2.5181	0.0117989	0.0299652
HORVU7Hr1G032330	17.4055	-1.92058	0.576296	-3.33262	0.000860326	0.00279238
HORVU7Hr1G032420	537.533	1.40114	0.100706	13.9131	5.27532e-44	1.11162e-42
HORVU7Hr1G033030	3749.25	1.70234	0.0644908	26.3966	1.4985e-153	1.04336e-151
HORVU7Hr1G033490	25.7765	3.28603	0.432183	7.60332	2.88636e-14	2.44579e-13
HORVU7Hr1G033520	753.844	1.00876	0.086199	11.7027	1.23512e-31	1.98271e-30
HORVU7Hr1G033530	18473.6	1.34218	0.0537456	24.9729	1.20407e-137	7.40245e-136
HORVU7Hr1G033620	16747.6	1.45419	0.0757227	19.2042	3.41532e-82	1.24721e-80
HORVU7Hr1G034920	6.35968	-2.95608	1.13735	-2.59911	0.00934664	0.0243857
HORVU7Hr1G035050	43.1856	-1.08293	0.344252	-3.14575	0.0016566	0.00508532
HORVU7Hr1G035440	6.09958	5.29979	1.40145	3.78163	0.000155802	0.000567794
HORVU7Hr1G035770	36.913	-1.72039	0.342531	-5.02259	5.09791e-07	2.54247e-06
HORVU7Hr1G035850	650.201	2.49188	0.100849	24.709	8.55025e-135	5.14707e-133
HORVU7Hr1G035980	85.6814	2.67571	0.234299	11.4201	3.31976e-30	5.11597e-29
HORVU7Hr1G036180	689.999	1.26373	0.119567	10.5692	4.13849e-26	5.66067e-25
HORVU7Hr1G036370	247.952	3.98177	0.183151	21.7404	8.52209e-105	3.96372e-103
HORVU7Hr1G036380	610.2	3.83204	0.12288	31.1853	1.6862e-213	1.92962e-211
HORVU7Hr1G036410	71.7136	4.03401	0.378817	10.649	1.76324e-26	2.44652e-25
HORVU7Hr1G036420	30.9555	4.94802	0.620528	7.97388	1.53765e-15	1.38144e-14
HORVU7Hr1G036570	31.8695	-1.61297	0.425866	-3.7875	0.00015217	0.000555608
HORVU7Hr1G036780	75.4478	1.22902	0.255733	4.80588	1.54074e-06	7.3058e-06
HORVU7Hr1G036880	10.3623	-1.80327	0.692087	-2.60555	0.00917267	0.0239669
HORVU7Hr1G036890	35.366	-1.5252	0.403817	-3.77696	0.000158757	0.000577651
HORVU7Hr1G037000	740.188	1.66218	0.0797549	20.8411	1.83637e-96	7.8032e-95
HORVU7Hr1G037020	99.09	1.76022	0.198329	8.87525	6.97768e-19	7.37184e-18
HORVU7Hr1G037080	753.7	1.078	0.0790981	13.6287	2.70518e-42	5.45187e-41
HORVU7Hr1G037180	2073.92	2.03659	0.0728077	27.9721	3.54902e-172	2.85851e-170
HORVU7Hr1G037320	7.28148	3.41284	0.917529	3.7196	0.000199538	0.00071534
HORVU7Hr1G038060	22.5544	3.2339	0.519743	6.22211	4.90507e-10	3.18588e-09
HORVU7Hr1G038160	772.262	1.44456	0.0772293	18.7048	4.52087e-78	1.56913e-76
HORVU7Hr1G038270	1400.34	1.12856	0.0867329	13.0119	1.04646e-38	1.97793e-37
HORVU7Hr1G038330	116.632	1.30138	0.216545	6.00973	1.85833e-09	1.15632e-08
HORVU7Hr1G038370	301.138	1.18485	0.133396	8.8822	6.55504e-19	6.93484e-18
HORVU7Hr1G038510	368.415	2.29249	0.119405	19.1994	3.74556e-82	1.36565e-80
HORVU7Hr1G038530	202.437	-1.47386	0.148731	-9.90959	3.78208e-23	4.73088e-22
HORVU7Hr1G038560	88.4266	2.05774	0.234147	8.78823	1.51939e-18	1.58208e-17
HORVU7Hr1G038570	15.4984	2.54482	0.71835	3.54259	0.000396221	0.00135952
HORVU7Hr1G038980	10.6287	-1.98522	0.745526	-2.66285	0.00774823	0.020599
HORVU7Hr1G039760	326.393	1.32558	0.111332	11.9066	1.09351e-32	1.80813e-31
HORVU7Hr1G039800	159.122	1.8535	0.160853	11.5229	1.01093e-30	1.58431e-29
HORVU7Hr1G039890	2418.98	3.81307	0.0747793	50.991	0	0
HORVU7Hr1G039900	86.6268	1.33956	0.235984	5.67649	1.3749e-08	7.97345e-08
HORVU7Hr1G040030	2328.55	1.39772	0.0888797	15.726	1.00357e-55	2.59202e-54
HORVU7Hr1G040140	17.5641	-1.45085	0.598055	-2.42595	0.0152682	0.0376589
HORVU7Hr1G040380	642.362	-1.06084	0.101384	-10.4636	1.26974e-25	1.71545e-24
HORVU7Hr1G040480	80.4887	1.00381	0.222633	4.50882	6.51878e-06	2.8873e-05
HORVU7Hr1G040590	862.11	3.78036	0.107531	35.156	9.42219e-271	1.56693e-268
HORVU7Hr1G040620	2.15216	4.79349	1.60235	2.99153	0.00277587	0.00812445
HORVU7Hr1G040680	221.094	4.25156	0.214291	19.8401	1.34067e-87	5.18244e-86
HORVU7Hr1G040690	74.6347	3.75637	0.31085	12.0842	1.28055e-33	2.15595e-32
HORVU7Hr1G040720	79.9259	4.35978	0.412896	10.559	4.61406e-26	6.29997e-25
HORVU7Hr1G040730	975.049	2.24827	0.0982308	22.8877	6.16624e-116	3.17459e-114
HORVU7Hr1G040740	626.677	2.95255	0.0990485	29.8091	2.97801e-195	2.90463e-193
HORVU7Hr1G040790	1314.47	6.02433	0.13901	43.3373	0	0
HORVU7Hr1G040850	80.5151	1.25403	0.252108	4.97417	6.55263e-07	3.23448e-06
HORVU7Hr1G040860	71.0078	2.78308	0.302165	9.21048	3.24662e-20	3.62906e-19
HORVU7Hr1G041160	126.101	1.15305	0.19077	6.0442	1.50155e-09	9.41153e-09
HORVU7Hr1G041230	294.509	3.72529	0.238933	15.5913	8.33606e-55	2.11754e-53
HORVU7Hr1G041260	207.19	2.79404	0.238541	11.713	1.09307e-31	1.75834e-30
HORVU7Hr1G041270	14.3666	2.85736	0.737997	3.87178	0.000108045	0.000402316
HORVU7Hr1G041300	162.052	3.44548	0.295413	11.6633	1.96323e-31	3.12979e-30
HORVU7Hr1G041380	241.539	1.24183	0.134669	9.22135	2.93375e-20	3.28409e-19
HORVU7Hr1G041500	589.338	5.68846	0.188414	30.1913	3.07839e-200	3.10743e-198
HORVU7Hr1G041570	448.455	1.73607	0.0992037	17.5001	1.43048e-68	4.41483e-67
HORVU7Hr1G041770	53.7827	1.13227	0.242024	4.67835	2.89193e-06	1.33353e-05
HORVU7Hr1G041810	45.5141	4.2199	0.487094	8.66343	4.5779e-18	4.66796e-17
HORVU7Hr1G042260	17.2065	-1.65325	0.557206	-2.96703	0.00300693	0.00872998
HORVU7Hr1G042390	19.95	4.6692	0.648017	7.20536	5.7889e-13	4.52847e-12
HORVU7Hr1G043300	33.3344	1.72228	0.36636	4.70104	2.58835e-06	1.19905e-05
HORVU7Hr1G043540	507.751	3.24189	0.115643	28.0337	6.31463e-173	5.15791e-171
HORVU7Hr1G043620	3773.1	2.8591	0.048001	59.5633	0	0
HORVU7Hr1G043790	107.466	-1.0274	0.209581	-4.90218	9.47799e-07	4.59797e-06
HORVU7Hr1G043810	180.224	3.03181	0.168641	17.9779	2.90475e-72	9.55139e-71
HORVU7Hr1G043870	4.20772	2.7667	1.19	2.32495	0.0200744	0.0479446
HORVU7Hr1G043880	48.7973	3.24512	0.296732	10.9362	7.73734e-28	1.11437e-26
HORVU7Hr1G044100	20.3391	1.95091	0.573942	3.39915	0.000675963	0.00223702
HORVU7Hr1G044160	89.9778	2.26959	0.268638	8.44849	2.95104e-17	2.8771e-16
HORVU7Hr1G044210	52.9809	2.21912	0.30255	7.33472	2.22178e-13	1.77773e-12
HORVU7Hr1G045280	29.4677	-1.87287	0.387335	-4.83526	1.32969e-06	6.34279e-06
HORVU7Hr1G045330	313.023	2.29364	0.135014	16.9882	1.0048e-64	2.98548e-63
HORVU7Hr1G045640	302.087	-1.51209	0.109986	-13.7481	5.229e-43	1.07157e-41
HORVU7Hr1G045920	3.40147	-4.60253	1.45291	-3.1678	0.001536	0.004743
HORVU7Hr1G045930	8.22342	-6.11612	1.28487	-4.76011	1.93483e-06	9.07764e-06
HORVU7Hr1G045940	23.2911	-1.59467	0.396324	-4.02366	5.73008e-05	0.000222579
HORVU7Hr1G046620	34.836	-1.21187	0.360017	-3.36616	0.00076223	0.00249819
HORVU7Hr1G046800	10.0744	1.7377	0.651637	2.66666	0.00766081	0.0203924
HORVU7Hr1G046820	13.2227	1.51875	0.601462	2.52511	0.0115663	0.0294295
HORVU7Hr1G048430	43.9368	1.31042	0.311184	4.21107	2.54167e-05	0.000103933
HORVU7Hr1G048570	271.026	2.1583	0.123292	17.5055	1.30043e-68	4.02418e-67
HORVU7Hr1G048720	144.016	-1.03737	0.173663	-5.97349	2.32236e-09	1.43501e-08
HORVU7Hr1G048880	275.38	-1.48704	0.119586	-12.4349	1.68954e-35	2.97679e-34
HORVU7Hr1G048970	9130.07	1.70878	0.0525461	32.5197	5.62385e-232	7.47132e-230
HORVU7Hr1G049140	160.369	2.19624	0.22732	9.66145	4.39579e-22	5.29235e-21
HORVU7Hr1G049200	506.136	-1.32782	0.08533	-15.561	1.34037e-54	3.39365e-53
HORVU7Hr1G049860	34.2395	-2.31157	0.341929	-6.76039	1.37622e-11	9.90433e-11
HORVU7Hr1G049960	5596.53	1.17324	0.0577098	20.33	6.97372e-92	2.78901e-90
HORVU7Hr1G050160	68.4246	-1.20098	0.280671	-4.27896	1.87769e-05	7.80939e-05
HORVU7Hr1G050500	43.2284	2.45354	0.407805	6.01647	1.78266e-09	1.11193e-08
HORVU7Hr1G050660	106.629	1.82542	0.202774	9.00226	2.21127e-19	2.39306e-18
HORVU7Hr1G050670	211.081	1.62266	0.164794	9.84658	7.09148e-23	8.78964e-22
HORVU7Hr1G050680	758.449	1.73835	0.087629	19.8376	1.40929e-87	5.43859e-86
HORVU7Hr1G051100	25.5844	-1.20903	0.392637	-3.07924	0.00207526	0.00624077
HORVU7Hr1G051260	207.656	-1.45702	0.146229	-9.96398	2.19109e-23	2.75717e-22
HORVU7Hr1G051310	9.53854	2.46224	0.699037	3.52234	0.000427761	0.00145993
HORVU7Hr1G051420	73.7414	1.15362	0.27752	4.15689	3.22609e-05	0.000130062
HORVU7Hr1G051720	3.93044	-3.06237	1.08991	-2.80975	0.00495796	0.0137668
HORVU7Hr1G052500	421.077	2.25234	0.10957	20.5562	6.77549e-94	2.78687e-92
HORVU7Hr1G052750	680.398	1.42051	0.0955028	14.874	4.86157e-50	1.1444e-48
HORVU7Hr1G052770	16.286	2.53149	0.547845	4.62082	3.82219e-06	1.73651e-05
HORVU7Hr1G053260	29.9167	5.91465	0.887201	6.66663	2.61736e-11	1.85478e-10
HORVU7Hr1G053300	1188.86	1.94044	0.0698195	27.7922	5.39603e-170	4.24267e-168
HORVU7Hr1G053440	238.418	-1.15366	0.129929	-8.87914	6.73814e-19	7.12204e-18
HORVU7Hr1G054020	350.125	2.80611	0.127954	21.9305	1.32861e-106	6.25502e-105
HORVU7Hr1G054380	438.115	-1.27972	0.115893	-11.0423	2.38903e-28	3.48862e-27
HORVU7Hr1G054610	73.9056	2.03456	0.24637	8.25817	1.47917e-16	1.39561e-15
HORVU7Hr1G056230	22.9707	1.33399	0.457367	2.91668	0.00353775	0.0101136
HORVU7Hr1G056310	10.9305	2.45049	0.692171	3.54029	0.000399691	0.0013702
HORVU7Hr1G057100	550.644	-1.46899	0.0909734	-16.1474	1.18427e-58	3.17951e-57
HORVU7Hr1G057230	1.95988	-4.05601	1.72969	-2.34493	0.0190306	0.045743
HORVU7Hr1G057410	425.011	-3.81541	0.141059	-27.0483	4.0033e-161	2.90095e-159
HORVU7Hr1G057650	296.993	1.24204	0.153384	8.09764	5.6037e-16	5.15665e-15
HORVU7Hr1G058250	16.8593	2.40659	0.437589	5.49965	3.80537e-08	2.12681e-07
HORVU7Hr1G058380	1.82281	5.17338	1.86192	2.77851	0.0054608	0.0150115
HORVU7Hr1G059000	15.4919	1.32019	0.499301	2.64407	0.00819158	0.021668
HORVU7Hr1G061070	21.0746	-1.29009	0.433523	-2.97582	0.00292202	0.00849948
HORVU7Hr1G063300	475.309	1.08183	0.0965519	11.2047	3.86719e-29	5.80104e-28
HORVU7Hr1G064770	12.308	-1.51458	0.617391	-2.45319	0.0141594	0.0352475
HORVU7Hr1G068560	252.928	2.63248	0.1926	13.6682	1.57315e-42	3.18992e-41
HORVU7Hr1G070010	75.864	-1.28751	0.24631	-5.22718	1.72111e-07	9.00119e-07
HORVU7Hr1G070080	14.151	1.89631	0.507386	3.73741	0.000185923	0.000669229
HORVU7Hr1G071280	268.981	1.35528	0.19039	7.11845	1.09145e-12	8.4128e-12
HORVU7Hr1G071790	25.6586	-2.86507	0.545652	-5.25073	1.51501e-07	7.98109e-07
HORVU7Hr1G071870	21.6158	1.11272	0.429101	2.59313	0.00951057	0.0247491
HORVU7Hr1G072680	274.309	-1.77005	0.13033	-13.5813	5.16934e-42	1.03818e-40
HORVU7Hr1G072960	77.5744	2.1995	0.254357	8.6473	5.27329e-18	5.35342e-17
HORVU7Hr1G073050	449.402	-1.03881	0.110007	-9.44316	3.61713e-21	4.18277e-20
HORVU7Hr1G073340	21.2475	4.31102	0.599913	7.18609	6.66753e-13	5.1947e-12
HORVU7Hr1G073350	28.3786	4.79329	0.607302	7.89276	2.95574e-15	2.62586e-14
HORVU7Hr1G074600	167.346	1.29862	0.148025	8.77296	1.74027e-18	1.80963e-17
HORVU7Hr1G074640	1160.14	2.06283	0.069758	29.5712	3.50828e-192	3.3101e-190
HORVU7Hr1G074660	2436.75	2.16186	0.0639213	33.8207	9.78766e-251	1.47877e-248
HORVU7Hr1G074820	169.531	1.62928	0.165814	9.82592	8.70743e-23	1.07694e-21
HORVU7Hr1G075060	27.4073	1.21554	0.388536	3.12852	0.00175687	0.00536342
HORVU7Hr1G075120	4.7345	3.07352	1.10257	2.7876	0.00530996	0.0146544
HORVU7Hr1G075130	100.343	1.82565	0.211129	8.64706	5.2842e-18	5.36214e-17
HORVU7Hr1G075640	36.3396	-2.22354	0.337556	-6.58718	4.48258e-11	3.11637e-10
HORVU7Hr1G075760	69.5093	-2.49599	0.280874	-8.88652	6.30503e-19	6.67645e-18
HORVU7Hr1G075960	21.6503	3.31235	0.964551	3.43408	0.00059457	0.00198413
HORVU7Hr1G076790	2323.96	2.23553	0.0735719	30.3857	8.49292e-203	8.76439e-201
HORVU7Hr1G076840	873.768	2.55032	0.0851412	29.954	3.90264e-197	3.88851e-195
HORVU7Hr1G077430	30.9693	2.24769	0.389315	5.77345	7.76627e-09	4.58791e-08
HORVU7Hr1G077470	45.8181	1.38445	0.372696	3.71469	0.000203453	0.000728473
HORVU7Hr1G077600	42.5101	1.20599	0.368987	3.26837	0.00108168	0.00344458
HORVU7Hr1G078380	85.8601	3.09159	0.242696	12.7386	3.61038e-37	6.58702e-36
HORVU7Hr1G078710	26.0387	-1.22081	0.411715	-2.96518	0.00302511	0.00877725
HORVU7Hr1G079080	36.3462	1.12432	0.351103	3.20224	0.00136362	0.00425813
HORVU7Hr1G079160	42.9933	2.38458	0.308971	7.71782	1.1834e-14	1.02263e-13
HORVU7Hr1G079600	1603.48	4.29702	0.0881664	48.7377	0	0
HORVU7Hr1G080020	68.4141	2.08472	0.288989	7.21384	5.43973e-13	4.26688e-12
HORVU7Hr1G080070	537.829	1.0949	0.112799	9.70665	2.82456e-22	3.43103e-21
HORVU7Hr1G080190	212.066	2.00774	0.166041	12.0918	1.16656e-33	1.96547e-32
HORVU7Hr1G080800	10217	1.03138	0.0483916	21.3132	8.56739e-101	3.82324e-99
HORVU7Hr1G081510	1198.26	-1.02438	0.107904	-9.49345	2.23513e-21	2.61078e-20
HORVU7Hr1G081700	224.984	1.57126	0.148913	10.5515	4.99695e-26	6.80668e-25
HORVU7Hr1G081930	7769.5	1.12176	0.0548112	20.4659	4.33557e-93	1.76136e-91
HORVU7Hr1G082050	51.2254	1.60789	0.325576	4.93859	7.86878e-07	3.85289e-06
HORVU7Hr1G082060	5.5074	3.52351	1.04773	3.363	0.000770998	0.00252513
HORVU7Hr1G082450	29.6278	1.20758	0.402808	2.9979	0.00271845	0.0079776
HORVU7Hr1G082670	17.7896	1.08683	0.420264	2.58607	0.00970768	0.0252053
HORVU7Hr1G082720	9.51034	-1.50044	0.643186	-2.33283	0.019657	0.0470559
HORVU7Hr1G083180	75.7043	1.08737	0.242824	4.478	7.53443e-06	3.3124e-05
HORVU7Hr1G083270	190.001	1.6853	0.2151	7.83499	4.6889e-15	4.12281e-14
HORVU7Hr1G083390	12.7226	1.36772	0.576091	2.37413	0.0175902	0.0426266
HORVU7Hr1G083670	233.259	-1.17515	0.161187	-7.29064	3.08482e-13	2.44879e-12
HORVU7Hr1G083750	24.4023	1.20276	0.417622	2.88001	0.00397656	0.0112733
HORVU7Hr1G083850	105.22	2.30283	0.239777	9.60403	7.68774e-22	9.13675e-21
HORVU7Hr1G084390	34.5526	1.42107	0.336294	4.22569	2.38214e-05	9.79119e-05
HORVU7Hr1G084420	121.602	-1.24993	0.207811	-6.01478	1.80136e-09	1.12208e-08
HORVU7Hr1G084610	198.361	1.91802	0.152157	12.6055	1.9691e-36	3.52032e-35
HORVU7Hr1G084790	2.11228	5.44963	1.70154	3.20277	0.00136113	0.00425195
HORVU7Hr1G084940	46.0032	1.56797	0.265593	5.90367	3.5551e-09	2.16547e-08
HORVU7Hr1G085120	12.6574	-2.28227	0.618953	-3.6873	0.000226645	0.000806889
HORVU7Hr1G085270	114.81	1.25313	0.19604	6.39225	1.63464e-10	1.09685e-09
HORVU7Hr1G085450	42459.5	2.75132	0.0692926	39.7058	0	0
HORVU7Hr1G085660	7.78686	-2.74926	0.859218	-3.19973	0.00137557	0.00429349
HORVU7Hr1G085930	16.5154	-2.15114	0.578673	-3.71736	0.000201313	0.000721367
HORVU7Hr1G086250	347.021	3.97744	0.150062	26.5052	8.43839e-155	5.91097e-153
HORVU7Hr1G086330	243.979	2.93976	0.159222	18.4633	4.07492e-76	1.3832e-74
HORVU7Hr1G086340	1063.96	3.25294	0.111668	29.1304	1.47865e-186	1.34041e-184
HORVU7Hr1G086580	466.66	1.23921	0.104367	11.8736	1.6228e-32	2.66614e-31
HORVU7Hr1G086640	62.6182	-1.9434	0.263412	-7.37781	1.60919e-13	1.30017e-12
HORVU7Hr1G086690	341.863	-1.00802	0.138531	-7.27649	3.42625e-13	2.71051e-12
HORVU7Hr1G087240	14.8979	-3.58826	1.36241	-2.63376	0.0084445	0.0222479
HORVU7Hr1G087420	86.8202	2.83575	0.253531	11.185	4.82728e-29	7.21781e-28
HORVU7Hr1G088330	21.6411	1.11095	0.432069	2.57122	0.010134	0.0261514
HORVU7Hr1G088430	916.382	2.46672	0.0824514	29.9173	1.17134e-196	1.16209e-194
HORVU7Hr1G088980	152.754	1.04252	0.15368	6.78373	1.17111e-11	8.47308e-11
HORVU7Hr1G089160	656.208	2.04243	0.0953735	21.4151	9.66278e-102	4.37113e-100
HORVU7Hr1G089270	2.62165	4.52533	1.54158	2.93552	0.00332994	0.00957638
HORVU7Hr1G089450	162.39	1.71579	0.181859	9.43472	3.92034e-21	4.52886e-20
HORVU7Hr1G089480	6608.57	1.55151	0.0489436	31.6999	1.5575e-220	1.87516e-218
HORVU7Hr1G089530	329.886	3.70789	0.157275	23.5758	6.82062e-123	3.71853e-121
HORVU7Hr1G090280	961.226	1.27978	0.0980641	13.0504	6.32225e-39	1.19791e-37
HORVU7Hr1G090830	771.043	1.77795	0.0836777	21.2476	3.46845e-100	1.53595e-98
HORVU7Hr1G091060	10.6057	1.62364	0.685517	2.36849	0.017861	0.0432059
HORVU7Hr1G091080	4.08039	5.61016	1.3971	4.01557	5.93014e-05	0.000229809
HORVU7Hr1G091100	520.915	1.59674	0.0944796	16.9004	4.46868e-64	1.30923e-62
HORVU7Hr1G091250	1046.62	-2.24741	0.0740717	-30.341	3.29801e-202	3.37331e-200
HORVU7Hr1G091800	114.144	-3.08215	0.311934	-9.88078	5.04377e-23	6.2785e-22
HORVU7Hr1G091880	14.2546	-2.158	0.650717	-3.31634	0.000912035	0.0029482
HORVU7Hr1G092330	21.6304	-1.64818	0.419117	-3.9325	8.40656e-05	0.00031862
HORVU7Hr1G092550	1330.44	-1.4185	0.0655048	-21.655	5.45763e-104	2.52317e-102
HORVU7Hr1G092710	20.0311	1.78554	0.499522	3.5745	0.000350897	0.00121391
HORVU7Hr1G092940	1495.52	-1.56836	0.0577712	-27.1479	2.68375e-162	1.96321e-160
HORVU7Hr1G093080	44.3775	-1.9189	0.32226	-5.95451	2.60849e-09	1.60623e-08
HORVU7Hr1G094010	27.3447	1.64783	0.370692	4.44527	8.77797e-06	3.82491e-05
[truncated: 1,471 more rows]
