# Supplementary material for: Physiological Changes in Barley mlo-11 Powdery Mildew Resistance Conditioned by Tandem Repeat Copy Number
Source: Int J Mol Sci. 2020 Nov 20;21(22):8769. doi: 10.3390/ijms21228769 (PMC7699567; doi:10.3390/ijms21228769)
Supplement: Supplementary file 1 [file ijms-21-08769-s001.zip › SupplementaryTable2.xlsx]

## Sheet: Pallas-most-significant
Supplementary Table 2. Pallas NILs genes identified as significantly regulated between Bgh inoculated and control samples (not inoculated)
Gene	baseMean	log2FoldChange	lfcSE	stat	pvalue	padj
HORVU2Hr1G000050	143.812	2.24706	0.298637	7.52439	5.29658e-14	4.5438e-13
HORVU2Hr1G000140	304.929	2.6588	0.14649	18.15	1.28432e-73	6.83829e-72
HORVU2Hr1G000190	13.8779	1.26193	0.541116	2.33208	0.0196966	0.0413737
HORVU2Hr1G000430	257.089	1.08831	0.191869	5.67217	1.40996e-08	7.82869e-08
HORVU2Hr1G000480	201.97	2.4669	0.251963	9.7907	1.23444e-22	1.71443e-21
HORVU2Hr1G000570	5.28265	-2.85496	0.998188	-2.86014	0.0042345	0.010475
HORVU2Hr1G001010	37.8543	1.497	0.364502	4.10698	4.00868e-05	0.000145644
HORVU2Hr1G001160	63.3209	1.26193	0.232835	5.41986	5.96461e-08	3.11308e-07
HORVU2Hr1G001320	2496.8	-1.37125	0.0762583	-17.9816	2.71306e-72	1.41253e-70
HORVU2Hr1G001380	95.4797	-1.68491	0.231907	-7.26544	3.71817e-13	3.00094e-12
HORVU2Hr1G001780	313.117	3.09257	0.157094	19.6861	2.8355e-86	1.80532e-84
HORVU2Hr1G001790	127.337	2.04338	0.186294	10.9686	5.40968e-28	9.4504e-27
HORVU2Hr1G001820	29.2558	-1.16485	0.364564	-3.19518	0.00139743	0.00385071
HORVU2Hr1G002020	26.6309	3.67615	0.514701	7.14231	9.17733e-13	7.18483e-12
HORVU2Hr1G002140	10.4946	-1.8035	0.630956	-2.85836	0.00425841	0.0105304
HORVU2Hr1G002180	41.793	-1.05371	0.318935	-3.30382	0.000953756	0.00271047
HORVU2Hr1G002230	8.02211	-1.5572	0.673543	-2.31196	0.0207801	0.0434256
HORVU2Hr1G002250	41.8039	-1.30809	0.315227	-4.14967	3.32948e-05	0.000122547
HORVU2Hr1G002410	202.891	1.12219	0.211353	5.30957	1.09886e-07	5.55955e-07
HORVU2Hr1G002750	694.859	6.56048	0.209424	31.3264	2.04054e-215	4.68837e-213
HORVU2Hr1G002840	900.603	6.45847	0.183393	35.2165	1.11738e-271	4.37392e-269
HORVU2Hr1G003040	233.251	1.21892	0.132412	9.20547	3.40179e-20	4.15888e-19
HORVU2Hr1G003130	7.00785	4.03735	1.00212	4.02883	5.60559e-05	0.000199044
HORVU2Hr1G003210	49.5542	3.29922	0.408379	8.07881	6.54008e-16	6.34439e-15
HORVU2Hr1G003230	37.757	3.8595	0.434344	8.88582	6.34509e-19	7.28135e-18
HORVU2Hr1G003470	128.666	-1.38171	0.198843	-6.94876	3.68523e-12	2.77812e-11
HORVU2Hr1G003540	9.10857	2.4546	0.720608	3.40629	0.000658512	0.00192899
HORVU2Hr1G003750	13.3659	2.13192	0.574545	3.71062	0.00020675	0.000665186
HORVU2Hr1G003860	61.231	2.67073	0.356397	7.4937	6.69611e-14	5.68215e-13
HORVU2Hr1G004170	1371.36	-1.22315	0.295675	-4.1368	3.52185e-05	0.000129155
HORVU2Hr1G004230	2506.69	1.40757	0.0739802	19.0263	1.03276e-80	6.064e-79
HORVU2Hr1G004280	3.0823	3.58776	1.46316	2.45207	0.0142037	0.0309683
HORVU2Hr1G004480	303.269	3.61379	0.148743	24.2955	2.18489e-130	2.40543e-128
HORVU2Hr1G004510	8.20981	6.54468	1.29445	5.05597	4.28207e-07	2.02856e-06
HORVU2Hr1G004530	642.512	4.1354	0.183345	22.5552	1.19267e-112	1.082e-110
HORVU2Hr1G004540	1099.25	4.06199	0.15073	26.9488	5.89091e-160	8.89444e-158
HORVU2Hr1G004550	2469.04	3.5719	0.113529	31.4624	2.84219e-217	6.67537e-215
HORVU2Hr1G004600	30.9351	3.82344	0.494869	7.72616	1.10838e-14	9.93596e-14
HORVU2Hr1G004610	57.9308	3.85793	0.354681	10.8772	1.48057e-27	2.55688e-26
HORVU2Hr1G004620	357.442	2.90647	0.188987	15.3792	2.25613e-53	7.90879e-52
HORVU2Hr1G004720	198.575	1.98543	0.210421	9.4355	3.89149e-21	4.99443e-20
HORVU2Hr1G005020	10.6515	1.78717	0.639954	2.79266	0.00522769	0.012668
HORVU2Hr1G005210	143.961	1.47979	0.194404	7.61191	2.70082e-14	2.36888e-13
HORVU2Hr1G005620	188.217	1.26288	0.200396	6.30192	2.93985e-10	1.90039e-09
HORVU2Hr1G006000	123.133	1.39747	0.233854	5.97583	2.28919e-09	1.37157e-08
HORVU2Hr1G006100	58.3224	4.00757	0.377773	10.6084	2.72328e-26	4.45548e-25
HORVU2Hr1G006320	17.7718	1.36816	0.475591	2.87675	0.00401789	0.0100036
HORVU2Hr1G006620	7.27251	2.45965	0.953081	2.58073	0.00985905	0.0223798
HORVU2Hr1G006930	60.681	-1.80456	0.2428	-7.43228	1.0674e-13	8.92515e-13
HORVU2Hr1G007340	3.03925	5.38898	1.54011	3.49908	0.000466864	0.00140518
HORVU2Hr1G007350	6048.88	-2.04072	0.0687962	-29.6633	2.2852e-193	4.27473e-191
HORVU2Hr1G007420	4.97201	6.31705	1.38314	4.56719	4.94309e-06	2.06496e-05
HORVU2Hr1G007490	83.6307	-3.64397	0.291873	-12.4848	9.03821e-36	2.04331e-34
HORVU2Hr1G007600	3.83265	4.60322	1.36861	3.36343	0.00076979	0.00222597
HORVU2Hr1G007760	603.152	1.17479	0.105018	11.1867	4.73999e-29	8.61512e-28
HORVU2Hr1G007990	105.448	-1.31703	0.223506	-5.89259	3.80182e-09	2.22119e-08
HORVU2Hr1G008130	64.3081	2.91006	0.319057	9.12081	7.45634e-20	8.95015e-19
HORVU2Hr1G008140	528.051	2.81982	0.147725	19.0883	3.15851e-81	1.88069e-79
HORVU2Hr1G008220	508.609	3.22691	0.277728	11.619	3.30146e-31	6.52207e-30
HORVU2Hr1G008250	12.7827	2.10299	0.649715	3.23679	0.00120883	0.00337457
HORVU2Hr1G008310	6.26141	2.35028	0.935208	2.51311	0.011967	0.0266273
HORVU2Hr1G008370	4.44958	4.46064	1.359	3.28229	0.00102969	0.00291207
HORVU2Hr1G008390	448.799	2.03563	0.108861	18.6993	5.01571e-78	2.85774e-76
HORVU2Hr1G009830	146.882	1.17945	0.287528	4.10204	4.09517e-05	0.000148582
HORVU2Hr1G010040	19.6806	-1.22948	0.40443	-3.04002	0.00236559	0.00622626
HORVU2Hr1G010540	4.13111	4.85699	1.38572	3.50503	0.000456553	0.0013763
HORVU2Hr1G010560	1852.49	2.79501	0.107666	25.9599	1.40504e-148	1.83332e-146
HORVU2Hr1G010590	322.629	1.45075	0.116092	12.4965	7.79719e-36	1.76653e-34
HORVU2Hr1G010610	34.2622	1.31654	0.383063	3.43688	0.000588447	0.00174088
HORVU2Hr1G010630	7.59468	-1.71286	0.641153	-2.67153	0.00755055	0.0176475
HORVU2Hr1G010830	45.1582	2.97911	0.368655	8.08104	6.42144e-16	6.23216e-15
HORVU2Hr1G010840	198.853	3.44934	0.181271	19.0286	9.87996e-81	5.81734e-79
HORVU2Hr1G010970	25.6607	1.36557	0.392713	3.47728	0.000506533	0.00151508
HORVU2Hr1G011420	26.7756	5.36608	0.885215	6.06189	1.34527e-09	8.22098e-09
HORVU2Hr1G011430	28.3929	3.72445	0.521879	7.1366	9.56665e-13	7.47854e-12
HORVU2Hr1G011510	125.839	3.07958	0.214521	14.3556	9.82483e-47	3.02296e-45
HORVU2Hr1G011530	47.3976	3.74494	0.430183	8.70546	3.1628e-18	3.50394e-17
HORVU2Hr1G012130	18.6872	1.68979	0.422313	4.00128	6.30018e-05	0.000222512
HORVU2Hr1G012210	6.0554	-1.78038	0.767657	-2.31923	0.0203824	0.0426789
HORVU2Hr1G012360	47.2119	3.12664	0.389301	8.03143	9.63406e-16	9.26079e-15
HORVU2Hr1G012810	93.4191	-1.44277	0.205208	-7.0308	2.05347e-12	1.57155e-11
HORVU2Hr1G012980	398.342	2.97442	0.151015	19.6961	2.32699e-86	1.49054e-84
HORVU2Hr1G013200	697.148	1.15715	0.0893555	12.95	2.35075e-38	5.80492e-37
HORVU2Hr1G013210	106.585	1.12726	0.329528	3.42082	0.000624315	0.00183773
HORVU2Hr1G013390	6.22083	5.76846	1.292	4.46476	8.01589e-06	3.25033e-05
HORVU2Hr1G013420	19.5852	1.6297	0.505276	3.22537	0.00125811	0.00349827
HORVU2Hr1G013450	179.415	1.58513	0.159491	9.93871	2.82469e-23	4.02347e-22
HORVU2Hr1G013560	76.1571	-1.3539	0.199571	-6.78406	1.16849e-11	8.47615e-11
HORVU2Hr1G013760	9.7274	3.58069	0.909249	3.93807	8.21382e-05	0.000284971
HORVU2Hr1G014140	364.546	1.14433	0.109836	10.4185	2.04097e-25	3.20758e-24
HORVU2Hr1G014890	89.9334	4.34056	0.318402	13.6323	2.57265e-42	7.09931e-41
HORVU2Hr1G014900	392.752	2.2857	0.131024	17.4449	3.76094e-68	1.80679e-66
HORVU2Hr1G014930	192.819	1.93409	0.158538	12.1995	3.1264e-34	6.785e-33
HORVU2Hr1G015360	1582.89	1.1041	0.0822175	13.429	4.09091e-41	1.10017e-39
HORVU2Hr1G015720	1419.93	-1.58121	0.105316	-15.014	5.94259e-51	1.98443e-49
HORVU2Hr1G015740	4.4442	-2.01692	0.895874	-2.25134	0.024364	0.0499861
HORVU2Hr1G016540	3.15204	5.31436	1.44092	3.68817	0.000225874	0.000720465
HORVU2Hr1G016720	161.622	2.05076	0.165445	12.3954	2.76725e-35	6.16376e-34
HORVU2Hr1G016760	102.142	1.33973	0.522401	2.56455	0.0103309	0.0233406
HORVU2Hr1G017220	3.13479	5.06947	1.55911	3.25152	0.0011479	0.00322107
HORVU2Hr1G017350	287.725	2.87553	0.193369	14.8707	5.11043e-50	1.66191e-48
HORVU2Hr1G017360	11.9479	3.96138	0.789072	5.02029	5.15925e-07	2.42132e-06
HORVU2Hr1G017370	47.2472	4.67725	0.453797	10.3069	6.55683e-25	1.01537e-23
HORVU2Hr1G017470	75.9888	2.10871	0.27715	7.60856	2.7717e-14	2.42802e-13
HORVU2Hr1G017720	26.3673	5.9476	0.88322	6.73399	1.65067e-11	1.18311e-10
HORVU2Hr1G017740	338.149	7.11474	0.360146	19.7552	7.24387e-87	4.71141e-85
HORVU2Hr1G017770	3.53666	3.7487	1.25487	2.98731	0.00281445	0.00727372
HORVU2Hr1G017950	151.039	2.0382	0.187739	10.8566	1.85521e-27	3.19344e-26
HORVU2Hr1G018430	1973.57	5.17221	0.236067	21.9099	2.09078e-106	1.7749e-104
HORVU2Hr1G018440	9.6964	1.69707	0.633573	2.67857	0.00739363	0.017319
HORVU2Hr1G018480	939.423	4.6664	0.128508	36.3122	1.03683e-288	4.6631e-286
HORVU2Hr1G018510	1920.05	4.5502	0.141595	32.1354	1.41344e-226	3.59967e-224
HORVU2Hr1G019010	178.568	-1.74724	0.222291	-7.86012	3.83778e-15	3.54249e-14
HORVU2Hr1G019180	538.619	1.12334	0.106837	10.5145	7.4075e-26	1.18801e-24
HORVU2Hr1G020450	11.4887	1.36343	0.555553	2.45418	0.0141205	0.030822
HORVU2Hr1G020630	6.46814	2.9578	0.887648	3.33218	0.000861681	0.0024714
HORVU2Hr1G021290	90.8124	-1.21629	0.29793	-4.08246	4.45607e-05	0.00016082
HORVU2Hr1G021320	321.586	1.34796	0.114005	11.8237	2.94438e-32	6.00176e-31
HORVU2Hr1G021810	4.22308	4.2044	1.38286	3.04036	0.00236295	0.00622094
HORVU2Hr1G022080	254.607	1.77461	0.125173	14.1772	1.26831e-45	3.80277e-44
HORVU2Hr1G022350	361.816	1.54941	0.127421	12.1598	5.09096e-34	1.09921e-32
HORVU2Hr1G022800	12.4137	1.68747	0.576597	2.92661	0.00342683	0.00868855
HORVU2Hr1G022940	3.55733	3.36668	1.24579	2.70245	0.00688312	0.0162365
HORVU2Hr1G022960	98.0042	1.86733	0.249001	7.49926	6.41784e-14	5.45259e-13
HORVU2Hr1G023070	19.1039	1.46007	0.507254	2.87839	0.00399713	0.00996008
HORVU2Hr1G023430	59.551	-1.51448	0.276957	-5.46828	4.54422e-08	2.3966e-07
HORVU2Hr1G023490	47.8857	-1.0542	0.324131	-3.25238	0.00114444	0.00321177
HORVU2Hr1G023540	16.8925	-1.33653	0.533579	-2.50485	0.0122504	0.027189
HORVU2Hr1G023750	10.722	6.13058	1.33045	4.60789	4.06768e-06	1.71622e-05
HORVU2Hr1G023840	15.4909	1.08168	0.462166	2.34045	0.0192603	0.040538
HORVU2Hr1G024160	458.973	3.1515	0.131726	23.9247	1.69527e-126	1.7566e-124
HORVU2Hr1G024280	15.2836	3.03341	0.600858	5.04846	4.45384e-07	2.10522e-06
HORVU2Hr1G024300	112.942	4.42393	0.319411	13.8503	1.26758e-43	3.60621e-42
HORVU2Hr1G024460	64.918	4.30109	0.384419	11.1886	4.63918e-29	8.44642e-28
HORVU2Hr1G024480	162.149	3.24714	0.203307	15.9716	2.01508e-57	7.63348e-56
HORVU2Hr1G024740	11.3553	1.67316	0.624393	2.67966	0.00736977	0.0172708
HORVU2Hr1G025150	39.2347	1.26396	0.290768	4.34698	1.38025e-05	5.39193e-05
HORVU2Hr1G025380	2073.88	-1.28217	0.107201	-11.9605	5.72229e-33	1.19053e-31
HORVU2Hr1G025450	18.5404	1.25439	0.491735	2.55096	0.0107428	0.0241911
HORVU2Hr1G026820	94.9089	-1.01377	0.254097	-3.98971	6.61543e-05	0.000232783
HORVU2Hr1G027640	392.055	1.00291	0.119136	8.41819	3.82346e-17	3.97933e-16
HORVU2Hr1G028320	10.4705	3.03061	0.815292	3.71721	0.000201435	0.000649174
HORVU2Hr1G028330	739.662	2.85966	0.145854	19.6063	1.36603e-85	8.61946e-84
HORVU2Hr1G028580	31.6564	1.18214	0.375499	3.14818	0.00164291	0.00446602
HORVU2Hr1G028590	28.0811	-1.14516	0.395896	-2.89257	0.003821	0.00956177
HORVU2Hr1G028670	1069.8	1.608	0.0971493	16.5518	1.55265e-61	6.53785e-60
HORVU2Hr1G029450	50.6008	2.77576	0.370088	7.50028	6.36822e-14	5.41478e-13
HORVU2Hr1G029460	227.299	2.52818	0.149642	16.8948	4.91514e-64	2.17812e-62
HORVU2Hr1G029600	637.926	1.14304	0.0961274	11.8909	1.31996e-32	2.72474e-31
HORVU2Hr1G029840	73.9752	-1.1394	0.21685	-5.25434	1.48557e-07	7.42539e-07
HORVU2Hr1G029960	4.11402	3.37763	1.25885	2.6831	0.0072943	0.0171072
HORVU2Hr1G030030	27.7185	1.0241	0.399841	2.56127	0.0104291	0.0235423
HORVU2Hr1G030190	53.3422	4.21405	0.435726	9.67134	3.99134e-22	5.40827e-21
HORVU2Hr1G031410	172.228	2.69212	0.182748	14.7313	4.05561e-49	1.30682e-47
HORVU2Hr1G031460	319.578	2.85644	0.140341	20.3536	4.31625e-92	3.0514e-90
HORVU2Hr1G031490	75.1997	2.21712	0.287448	7.71312	1.22782e-14	1.0974e-13
HORVU2Hr1G031500	885.21	2.49907	0.124645	20.0496	2.03616e-89	1.39742e-87
HORVU2Hr1G032360	929.589	2.22265	0.0747844	29.7208	4.14067e-194	7.88518e-192
HORVU2Hr1G032780	124.448	1.00578	0.172172	5.8417	5.16702e-09	2.98602e-08
HORVU2Hr1G032970	5076.27	-1.36388	0.055156	-24.7278	5.3767e-135	6.11036e-133
HORVU2Hr1G033070	35.4837	1.98355	0.30588	6.48473	8.88919e-11	5.98216e-10
HORVU2Hr1G033100	44.5946	1.81001	0.313564	5.77237	7.81646e-09	4.43079e-08
HORVU2Hr1G033610	118.433	3.30211	0.213066	15.498	3.57687e-54	1.26859e-52
HORVU2Hr1G033850	18.6542	1.25181	0.488462	2.56276	0.0103843	0.0234538
HORVU2Hr1G034370	85.7249	1.58293	0.207044	7.64537	2.08339e-14	1.83878e-13
HORVU2Hr1G034650	124.521	-1.01258	0.168744	-6.00066	1.96513e-09	1.18311e-08
HORVU2Hr1G035770	29.0585	1.35371	0.433363	3.12374	0.00178567	0.00481755
HORVU2Hr1G035800	23.6489	1.2223	0.466996	2.61737	0.00886111	0.0203461
HORVU2Hr1G035830	9.26484	3.28908	0.851535	3.86253	0.000112221	0.000379844
HORVU2Hr1G036440	71.5275	1.3586	0.214257	6.34097	2.28316e-10	1.48998e-09
HORVU2Hr1G036490	536.257	-1.00526	0.10002	-10.0506	9.13528e-24	1.33912e-22
HORVU2Hr1G036510	524.621	-1.10142	0.107531	-10.2429	1.27417e-24	1.95169e-23
HORVU2Hr1G036570	811.01	1.32024	0.0761849	17.3294	2.82404e-67	1.33545e-65
HORVU2Hr1G036590	3455.09	3.19381	0.0680704	46.9192	0	0
HORVU2Hr1G036930	30.0779	-1.91427	0.381267	-5.02082	5.1452e-07	2.41526e-06
HORVU2Hr1G036960	175993	-1.29988	0.112792	-11.5246	9.91793e-31	1.92866e-29
HORVU2Hr1G037100	22.5394	2.77882	0.503375	5.52038	3.38266e-08	1.80153e-07
HORVU2Hr1G037140	32.2617	-2.01335	0.356861	-5.64183	1.68252e-08	9.269e-08
HORVU2Hr1G037200	440.918	2.37273	0.120957	19.6164	1.12054e-85	7.1129e-84
HORVU2Hr1G037210	78.0966	6.36481	0.570242	11.1616	6.28527e-29	1.1336e-27
HORVU2Hr1G037750	418.093	1.90697	0.138154	13.8033	2.43558e-43	6.88279e-42
HORVU2Hr1G038120	190.874	1.38617	0.170075	8.15035	3.62879e-16	3.58604e-15
HORVU2Hr1G038140	197.549	2.44256	0.187788	13.007	1.11646e-38	2.78627e-37
HORVU2Hr1G038410	55.1226	-1.06127	0.287618	-3.68986	0.000224379	0.000716229
HORVU2Hr1G038760	145.102	1.06455	0.15373	6.92481	4.36571e-12	3.27591e-11
HORVU2Hr1G038830	170.997	1.16829	0.137089	8.52212	1.56653e-17	1.66065e-16
HORVU2Hr1G038960	20.4639	1.60241	0.488512	3.2802	0.00103735	0.00293227
HORVU2Hr1G038990	46.2969	1.64203	0.30703	5.3481	8.88847e-08	4.54926e-07
HORVU2Hr1G039050	10.1784	1.45466	0.553889	2.62627	0.00863259	0.0199057
ENSRNA049483811	10.817	-1.59945	0.623525	-2.56517	0.0103124	0.0233113
HORVU2Hr1G039540	160.624	1.08825	0.256383	4.24462	2.18962e-05	8.29021e-05
HORVU2Hr1G040790	99.4209	-1.36426	0.220018	-6.20065	5.62297e-10	3.55332e-09
HORVU2Hr1G040800	174.479	-1.81517	0.17815	-10.189	2.21984e-24	3.34686e-23
HORVU2Hr1G040810	4.81038	-2.65543	0.796193	-3.33516	0.000852499	0.00244672
HORVU2Hr1G040830	18.1051	1.42518	0.424221	3.35952	0.000780772	0.00225464
HORVU2Hr1G041000	17.0954	-1.56047	0.457837	-3.40835	0.000653561	0.00191609
HORVU2Hr1G041080	177.847	1.39273	0.159478	8.73305	2.47905e-18	2.76091e-17
HORVU2Hr1G041270	319.098	-1.54173	0.332806	-4.63253	3.6122e-06	1.53471e-05
HORVU2Hr1G042210	199.616	2.47232	0.17197	14.3765	7.26986e-47	2.24993e-45
HORVU2Hr1G042520	69.2456	2.84066	0.294457	9.64711	5.05614e-22	6.80744e-21
HORVU2Hr1G042550	53.5814	3.69331	0.385989	9.56843	1.08546e-21	1.43314e-20
HORVU2Hr1G043130	10.2761	2.10909	0.606437	3.47784	0.000505475	0.00151233
HORVU2Hr1G043360	12.6696	-1.464	0.494738	-2.95913	0.00308507	0.00789876
HORVU2Hr1G043860	208.297	1.08787	0.131981	8.24265	1.68442e-16	1.68986e-15
HORVU2Hr1G043900	2020.42	2.28345	0.0961518	23.7484	1.14087e-124	1.15386e-122
HORVU2Hr1G043940	61.0269	2.04353	0.596692	3.42476	0.000615334	0.00181265
HORVU2Hr1G043960	52.9178	-1.19004	0.32674	-3.64215	0.000270371	0.00085021
HORVU2Hr1G044270	61.8885	2.94725	0.28469	10.3525	4.0787e-25	6.35808e-24
HORVU2Hr1G044440	121.357	4.78151	0.320936	14.8987	3.36306e-50	1.10557e-48
HORVU2Hr1G044450	856.298	4.72995	0.135853	34.8168	1.35332e-265	4.84857e-263
HORVU2Hr1G044520	771.27	1.45346	0.0950854	15.2858	9.51161e-53	3.28523e-51
HORVU2Hr1G044560	26.3171	-1.08975	0.406503	-2.68079	0.00734476	0.0172198
HORVU2Hr1G044590	5.34718	2.09635	0.846752	2.47575	0.0132956	0.0292084
HORVU2Hr1G044600	37.3841	7.01284	1.04846	6.68873	2.25117e-11	1.58988e-10
HORVU2Hr1G044640	45.0244	1.20479	0.281567	4.27888	1.87837e-05	7.19553e-05
HORVU2Hr1G044650	1426.67	2.12891	0.106287	20.0299	3.0246e-89	2.05575e-87
HORVU2Hr1G044680	683.614	2.10846	0.138107	15.2668	1.27193e-52	4.37173e-51
HORVU2Hr1G044740	28.5427	-1.95384	0.483969	-4.03712	5.4112e-05	0.000192887
HORVU2Hr1G044870	671.767	1.44269	0.154093	9.36247	7.7892e-21	9.84737e-20
HORVU2Hr1G044890	7.59733	3.53664	0.980965	3.60526	0.000311836	0.000969352
HORVU2Hr1G044910	851.465	1.58804	0.0948171	16.7484	5.81674e-63	2.52473e-61
HORVU2Hr1G044940	52.3288	2.97613	0.353466	8.41985	3.76969e-17	3.92531e-16
HORVU2Hr1G045120	36.686	1.21532	0.343442	3.53864	0.0004022	0.00122556
HORVU2Hr1G045330	17.5906	1.94844	0.465132	4.18901	2.80177e-05	0.000104359
HORVU2Hr1G045350	28.4145	4.52543	0.582185	7.77317	7.65464e-15	6.91765e-14
HORVU2Hr1G045380	303.115	-1.04061	0.171696	-6.06077	1.35468e-09	8.27132e-09
HORVU2Hr1G046180	51.3276	1.89908	0.291328	6.5187	7.09202e-11	4.82339e-10
HORVU2Hr1G046290	3.5824	3.77147	1.41134	2.67227	0.00753406	0.0176128
HORVU2Hr1G046590	243.689	1.39813	0.136513	10.2417	1.28896e-24	1.97292e-23
HORVU2Hr1G046600	20.5227	4.893	0.73391	6.66703	2.61034e-11	1.83374e-10
HORVU2Hr1G047890	23.6267	-1.15252	0.341576	-3.37411	0.000740537	0.00214991
HORVU2Hr1G048220	428.147	1.0738	0.201458	5.33016	9.81246e-08	4.98979e-07
HORVU2Hr1G050260	38.6494	1.33342	0.335311	3.97666	6.9891e-05	0.000245082
ENSRNA049483503	3.27781	-4.1739	1.67454	-2.49256	0.0126825	0.0280158
HORVU2Hr1G056940	3.24347	-3.03989	1.31333	-2.31465	0.0206321	0.0431418
HORVU2Hr1G058790	6.10809	-2.22973	0.988576	-2.2555	0.0241022	0.0495067
HORVU2Hr1G059940	70.2133	1.34858	0.239042	5.6416	1.68481e-08	9.27921e-08
HORVU2Hr1G060070	89.9081	-1.21251	0.246005	-4.9288	8.27382e-07	3.79211e-06
HORVU2Hr1G060120	164.024	1.1364	0.158281	7.17967	6.98796e-13	5.52399e-12
HORVU2Hr1G060560	6.31683	2.19782	0.829161	2.65065	0.00803372	0.0186571
ENSRNA050017055	5.25507	-2.71836	1.19859	-2.26796	0.0233315	0.0481011
HORVU2Hr1G062700	355.705	1.10384	0.12032	9.17423	4.54798e-20	5.53455e-19
HORVU2Hr1G062880	77.0032	2.62996	0.345257	7.61741	2.58818e-14	2.27196e-13
HORVU2Hr1G062890	59.7486	-1.08103	0.246707	-4.38182	1.1769e-05	4.65343e-05
HORVU2Hr1G063510	69.3151	1.72634	0.242902	7.10712	1.18491e-12	9.21169e-12
HORVU2Hr1G063620	148.805	2.22514	0.195438	11.3854	4.94605e-30	9.23584e-29
HORVU2Hr1G063690	235.582	5.4131	0.259797	20.8358	2.04935e-96	1.55824e-94
HORVU2Hr1G063910	10.897	1.83478	0.601784	3.0489	0.00229681	0.00606118
HORVU2Hr1G064150	1192.21	3.26281	0.104937	31.0932	2.97901e-212	6.77099e-210
HORVU2Hr1G064160	984.038	3.40042	0.185642	18.3171	6.04889e-75	3.30391e-73
HORVU2Hr1G064180	12.3951	4.90787	1.11071	4.41869	9.92997e-06	3.96561e-05
HORVU2Hr1G064420	53.9073	2.83389	0.755524	3.7509	0.000176201	0.000576109
HORVU2Hr1G065000	96.3466	1.54916	0.190821	8.11838	4.72462e-16	4.61502e-15
HORVU2Hr1G065040	17.386	2.10554	0.51528	4.08621	4.38476e-05	0.000158517
HORVU2Hr1G065340	9.9223	-1.37522	0.579633	-2.37257	0.0176648	0.0375842
HORVU2Hr1G065430	127.424	-1.01654	0.16234	-6.2618	3.80551e-10	2.43686e-09
HORVU2Hr1G065450	1913.3	-1.44831	0.0641669	-22.571	8.34691e-113	7.63797e-111
HORVU2Hr1G066080	16.4804	1.59465	0.503167	3.16923	0.00152842	0.00417791
HORVU2Hr1G066100	90.9284	1.8683	0.291221	6.41541	1.40448e-10	9.30658e-10
HORVU2Hr1G066280	18.5746	2.13516	0.479041	4.45715	8.30579e-06	3.36144e-05
HORVU2Hr1G066950	294.195	1.00005	0.118427	8.44443	3.05525e-17	3.20124e-16
HORVU2Hr1G067340	85.1976	2.95165	0.325386	9.0712	1.17712e-19	1.4018e-18
HORVU2Hr1G067350	243.26	2.65224	0.17044	15.5611	1.33749e-54	4.77566e-53
HORVU2Hr1G068560	2.2782	3.57453	1.5207	2.35058	0.0187443	0.0395979
HORVU2Hr1G068780	9.11856	1.74729	0.716856	2.43744	0.0147917	0.0321047
HORVU2Hr1G069780	9.51208	-1.63956	0.676044	-2.42523	0.0152987	0.033076
HORVU2Hr1G070310	13.2828	4.451	0.87072	5.11186	3.18998e-07	1.53249e-06
HORVU2Hr1G070700	10.6256	1.81339	0.656533	2.76207	0.00574359	0.0137776
HORVU2Hr1G071480	124.831	1.42987	0.192298	7.4357	1.04019e-13	8.70795e-13
HORVU2Hr1G071850	6261.93	-1.17242	0.0453314	-25.8633	1.7237e-147	2.22168e-145
HORVU2Hr1G073030	2619.04	-1.35094	0.0813485	-16.6069	6.21448e-62	2.64842e-60
HORVU2Hr1G073380	11.4925	2.43108	0.748944	3.24601	0.00117037	0.00327758
HORVU2Hr1G073680	9.69673	2.31607	0.818578	2.82938	0.00466379	0.0114343
HORVU2Hr1G073780	12.5008	1.26196	0.498289	2.53259	0.0113222	0.0253607
HORVU2Hr1G073830	78.4196	2.15877	0.259743	8.31119	9.47508e-17	9.64296e-16
HORVU2Hr1G075220	18.9828	1.85676	0.411963	4.5071	6.57183e-06	2.69634e-05
HORVU2Hr1G075230	42.3799	1.14484	0.300461	3.81028	0.000138811	0.000461423
HORVU2Hr1G075950	397.422	-1.45739	0.127924	-11.3926	4.55265e-30	8.51627e-29
HORVU2Hr1G075970	638.065	1.74707	0.109221	15.9958	1.36666e-57	5.21452e-56
HORVU2Hr1G076060	30.3229	2.84847	0.43768	6.50811	7.61019e-11	5.1559e-10
HORVU2Hr1G076320	1310.66	5.11758	0.133783	38.2528	0	0
HORVU2Hr1G076470	93.7281	4.69287	0.335381	13.9926	1.72877e-44	5.01961e-43
HORVU2Hr1G076490	32.0745	4.27797	0.527173	8.11492	4.86106e-16	4.74391e-15
HORVU2Hr1G076720	21.0291	2.26288	0.455543	4.96743	6.78444e-07	3.14426e-06
HORVU2Hr1G077370	16.0133	-5.84582	1.09868	-5.32075	1.0334e-07	5.24212e-07
HORVU2Hr1G077510	4.03805	2.94	1.08629	2.70645	0.00680065	0.0160545
HORVU2Hr1G077630	1033.92	-1.02334	0.101704	-10.0619	8.13959e-24	1.19565e-22
HORVU2Hr1G078290	915.457	1.11737	0.0926263	12.0632	1.65229e-33	3.49962e-32
HORVU2Hr1G078960	673.695	3.33958	0.117832	28.3419	1.0541e-176	1.75446e-174
HORVU2Hr1G079420	138.993	5.32319	0.326438	16.3069	8.81741e-60	3.5774e-58
HORVU2Hr1G079440	57.4182	5.7645	0.547217	10.5342	6.0082e-26	9.67998e-25
HORVU2Hr1G079580	21.7051	1.79668	0.492889	3.64521	0.000267176	0.000840413
HORVU2Hr1G079610	7.15472	2.26698	0.811778	2.79261	0.00522848	0.0126685
HORVU2Hr1G079630	138.724	-1.00236	0.172774	-5.8016	6.56836e-09	3.74945e-08
HORVU2Hr1G079780	253.37	1.07545	0.130195	8.26026	1.45356e-16	1.46801e-15
HORVU2Hr1G079810	241.987	-1.0438	0.135377	-7.71029	1.25528e-14	1.12005e-13
HORVU2Hr1G079910	351.39	-1.11145	0.148257	-7.49678	6.54042e-14	5.5545e-13
HORVU2Hr1G080020	2517.98	1.67246	0.0617841	27.0694	2.26045e-161	3.43751e-159
HORVU2Hr1G080140	1454.53	2.72546	0.0879594	30.9854	8.46647e-211	1.90387e-208
HORVU2Hr1G080430	41.1803	1.08352	0.309414	3.50184	0.000462051	0.00139208
HORVU2Hr1G080440	194.199	1.07211	0.147069	7.28985	3.10298e-13	2.51691e-12
HORVU2Hr1G080670	88.8405	1.26657	0.192954	6.5641	5.23484e-11	3.59266e-10
HORVU2Hr1G080890	2105.49	1.71041	0.065488	26.1179	2.28238e-150	3.09263e-148
HORVU2Hr1G081230	8.27575	1.62077	0.671879	2.41229	0.0158525	0.034165
HORVU2Hr1G081300	23.1585	1.66884	0.436378	3.82431	0.00013114	0.000437991
HORVU2Hr1G081510	57.9709	5.54746	0.564717	9.82344	8.92418e-23	1.24761e-21
HORVU2Hr1G081540	120.548	4.54035	0.307808	14.7506	3.05021e-49	9.84355e-48
HORVU2Hr1G081560	4.62073	2.65061	1.07285	2.47061	0.0134883	0.0295855
HORVU2Hr1G081590	1013.76	4.90167	0.140709	34.8356	7.03431e-266	2.56364e-263
HORVU2Hr1G081600	4.83756	4.21073	1.25913	3.34417	0.000825292	0.00237476
HORVU2Hr1G081640	8.82503	4.03054	0.988857	4.07596	4.58255e-05	0.000165103
HORVU2Hr1G081650	10.9055	1.54868	0.612502	2.52845	0.0114568	0.0256324
HORVU2Hr1G082170	16.3016	4.20372	0.708293	5.935	2.93839e-09	1.73739e-08
HORVU2Hr1G082330	36.979	-1.017	0.341517	-2.97787	0.00290256	0.00747949
HORVU2Hr1G082480	9.26259	1.70654	0.718894	2.37384	0.0176044	0.0374707
HORVU2Hr1G082700	12.9796	1.08817	0.481244	2.26115	0.0237497	0.0488823
HORVU2Hr1G082740	19.6759	2.31698	0.469894	4.93085	8.18706e-07	3.75479e-06
HORVU2Hr1G083020	2.85359	3.88877	1.42417	2.73055	0.00632287	0.0150241
HORVU2Hr1G083070	44.065	2.86352	0.500316	5.72342	1.044e-08	5.86606e-08
HORVU2Hr1G083430	409.857	-2.05425	0.147265	-13.9493	3.17843e-44	9.1409e-43
HORVU2Hr1G083490	563.606	-2.44934	0.202427	-12.0998	1.05828e-33	2.26417e-32
HORVU2Hr1G083560	21.0286	2.15711	0.484448	4.45272	8.47892e-06	3.42757e-05
HORVU2Hr1G083570	42.848	2.83381	0.369309	7.6733	1.67632e-14	1.48508e-13
HORVU2Hr1G084150	6.5316	6.0397	1.3109	4.6073	4.07935e-06	1.7208e-05
HORVU2Hr1G084170	84.2296	1.28771	0.232187	5.54599	2.92291e-08	1.56416e-07
HORVU2Hr1G084260	939.536	1.07873	0.132586	8.13607	4.08327e-16	4.00706e-15
HORVU2Hr1G084730	3366.03	1.40991	0.0557574	25.2866	4.48869e-141	5.45298e-139
HORVU2Hr1G084740	557.015	1.0899	0.109268	9.97456	1.96964e-23	2.82649e-22
HORVU2Hr1G084910	25.0865	1.03258	0.371701	2.77799	0.00546967	0.0131969
HORVU2Hr1G085260	62.659	3.78791	0.363434	10.4225	1.95637e-25	3.07921e-24
HORVU2Hr1G085270	1868.71	4.70312	0.105784	44.4597	0	0
HORVU2Hr1G085280	3110.89	3.33216	0.122773	27.1408	3.25236e-162	4.98177e-160
HORVU2Hr1G085610	4.16911	2.6848	1.11115	2.41623	0.015682	0.0338389
HORVU2Hr1G085740	48.338	1.29957	0.329115	3.94868	7.85826e-05	0.000273654
HORVU2Hr1G085990	30.0868	2.44166	0.524598	4.65435	3.24997e-06	1.38868e-05
HORVU2Hr1G086380	1830.53	1.2778	0.0703497	18.1635	1.00388e-73	5.35858e-72
HORVU2Hr1G086790	18.3198	1.57199	0.425435	3.69501	0.000219878	0.000702933
HORVU2Hr1G086840	30.991	1.61175	0.358997	4.48959	7.1362e-06	2.91319e-05
HORVU2Hr1G086900	169.857	1.19667	0.175335	6.82508	8.78775e-12	6.43197e-11
HORVU2Hr1G086950	877.494	-1.02453	0.0797889	-12.8406	9.71618e-38	2.34453e-36
HORVU2Hr1G087010	729.207	-1.38173	0.279384	-4.94562	7.59023e-07	3.49243e-06
HORVU2Hr1G087030	1660.55	1.17009	0.0747799	15.6471	3.47618e-55	1.26689e-53
HORVU2Hr1G087070	2.19154	4.67261	1.58952	2.93964	0.00328591	0.00836033
HORVU2Hr1G087370	28.9334	2.92169	0.437688	6.67528	2.46757e-11	1.73691e-10
HORVU2Hr1G087500	17.8727	5.18298	0.905678	5.72277	1.04803e-08	5.88712e-08
HORVU2Hr1G087630	17.1709	2.71534	0.553098	4.90933	9.13873e-07	4.17223e-06
HORVU2Hr1G088170	6.08751	5.62496	1.33558	4.21162	2.53548e-05	9.50941e-05
HORVU2Hr1G088640	18.2838	4.80113	0.739621	6.49133	8.50814e-11	5.73669e-10
HORVU2Hr1G089020	602.742	1.68979	0.103208	16.3727	2.99395e-60	1.21939e-58
HORVU2Hr1G089130	26.9456	1.30563	0.449951	2.90171	0.00371138	0.00933275
HORVU2Hr1G089440	3901.01	1.03179	0.144086	7.16094	8.01244e-13	6.30555e-12
HORVU2Hr1G089990	12.9566	5.88119	1.25154	4.69917	2.61216e-06	1.12685e-05
HORVU2Hr1G090120	28.3073	1.56984	0.377413	4.15946	3.18994e-05	0.000117739
HORVU2Hr1G090170	28.6155	1.21155	0.481327	2.5171	0.0118324	0.0263665
HORVU2Hr1G090200	28.7929	1.57614	0.373876	4.21567	2.49036e-05	9.3551e-05
HORVU2Hr1G090280	329.675	2.10591	0.130058	16.1921	5.73253e-59	2.27771e-57
HORVU2Hr1G090310	958.268	1.56218	0.090178	17.3233	3.1384e-67	1.4775e-65
HORVU2Hr1G090410	81.5589	-1.75565	0.284856	-6.16331	7.1242e-10	4.46196e-09
HORVU2Hr1G090640	3.30509	3.37821	1.4625	2.30989	0.0208941	0.0436378
HORVU2Hr1G090670	158.321	1.19481	0.21269	5.61761	1.93618e-08	1.05782e-07
HORVU2Hr1G091060	6.96564	-5.17979	1.16723	-4.43768	9.09319e-06	3.65769e-05
HORVU2Hr1G091190	139.99	2.14079	0.209602	10.2136	1.72351e-24	2.61909e-23
HORVU2Hr1G091320	1079.95	1.11613	0.0817688	13.6498	2.02333e-42	5.61274e-41
HORVU2Hr1G091460	50.9699	-1.7253	0.29551	-5.83838	5.27109e-09	3.04178e-08
HORVU2Hr1G091680	5936.7	-1.00863	0.098805	-10.2083	1.81955e-24	2.76107e-23
HORVU2Hr1G091720	348.899	1.55236	0.131053	11.8453	2.27484e-32	4.64596e-31
HORVU2Hr1G091910	427.486	-1.18531	0.127744	-9.27876	1.71463e-20	2.12574e-19
HORVU2Hr1G092030	11.935	2.51997	0.674336	3.73697	0.000186253	0.000605136
HORVU2Hr1G092530	12.6861	3.54893	0.710193	4.99714	5.81883e-07	2.71699e-06
HORVU2Hr1G092710	374.883	1.02515	0.136333	7.51947	5.49976e-14	4.70663e-13
HORVU2Hr1G092820	843.988	1.00972	0.116189	8.69038	3.61241e-18	3.99368e-17
HORVU2Hr1G092880	197.967	1.29459	0.25111	5.15547	2.52993e-07	1.22852e-06
HORVU2Hr1G093380	23.8386	1.56701	0.462269	3.38983	0.000699371	0.00203823
HORVU2Hr1G093670	2187.4	-1.19603	0.216368	-5.52778	3.24308e-08	1.72937e-07
HORVU2Hr1G093700	3931.93	-1.02935	0.0621079	-16.5736	1.08113e-61	4.57973e-60
HORVU2Hr1G093730	10.0482	-2.22438	0.619047	-3.59323	0.000326603	0.00101109
HORVU2Hr1G093960	75.6791	1.15547	0.270061	4.27855	1.88116e-05	7.20361e-05
HORVU2Hr1G094090	125.81	-1.20558	0.250581	-4.81114	1.50074e-06	6.68407e-06
HORVU2Hr1G094230	66.304	2.11805	0.2659	7.9656	1.64426e-15	1.55579e-14
HORVU2Hr1G094330	50.1577	2.74754	0.303095	9.06494	1.24674e-19	1.4822e-18
HORVU2Hr1G094960	996.705	-1.6671	0.15897	-10.4869	9.92502e-26	1.58336e-24
HORVU2Hr1G095360	1132.16	1.02184	0.120772	8.46096	2.6518e-17	2.79152e-16
HORVU2Hr1G095970	40.0671	1.10115	0.303704	3.62573	0.000288143	0.000900867
HORVU2Hr1G096380	121.093	1.16606	0.18513	6.29857	3.0041e-10	1.94014e-09
HORVU2Hr1G096510	103	1.42973	0.213316	6.70239	2.05044e-11	1.4547e-10
HORVU2Hr1G096550	4.94254	1.92482	0.838656	2.29513	0.0217259	0.0451595
HORVU2Hr1G096570	8.42468	2.01687	0.72788	2.77088	0.00559052	0.0134531
HORVU2Hr1G097900	116.954	-1.18398	0.164807	-7.18406	6.76708e-13	5.3574e-12
HORVU2Hr1G098160	70.7963	-1.08167	0.249241	-4.33986	1.42576e-05	5.55739e-05
HORVU2Hr1G098310	7.84465	2.49291	0.888174	2.80678	0.00500386	0.0121745
HORVU2Hr1G098650	580.147	1.19016	0.135422	8.7885	1.51573e-18	1.70513e-17
HORVU2Hr1G098980	48.9441	3.0411	0.338931	8.97262	2.8955e-19	3.39651e-18
HORVU2Hr1G099020	26.3577	1.54045	0.400012	3.85101	0.00011763	0.000396438
HORVU2Hr1G099100	38.4085	1.35024	0.289896	4.65768	3.19793e-06	1.36672e-05
HORVU2Hr1G099530	532.093	4.12983	0.207211	19.9306	2.21022e-88	1.47381e-86
HORVU2Hr1G099540	400.388	-1.21427	0.121346	-10.0067	1.42446e-23	2.06518e-22
HORVU2Hr1G099640	588.682	3.67556	0.124777	29.4571	1.02241e-190	1.84715e-188
HORVU2Hr1G099890	282.899	1.12025	0.122107	9.17429	4.54551e-20	5.53455e-19
HORVU2Hr1G100090	200.594	1.99252	0.155864	12.7837	2.02323e-37	4.79451e-36
HORVU2Hr1G100110	3.3317	3.77604	1.55919	2.4218	0.0154438	0.0333521
HORVU2Hr1G100360	72.6314	4.25518	0.372425	11.4256	3.11497e-30	5.92125e-29
HORVU2Hr1G100420	10.2926	-1.29607	0.556723	-2.32804	0.0199099	0.0417474
HORVU2Hr1G100450	250.009	2.3795	0.144615	16.4541	7.83781e-61	3.22954e-59
ENSRNA049478022	44.6511	-1.50828	0.275577	-5.47317	4.42052e-08	2.33661e-07
HORVU2Hr1G100870	9.13842	2.9785	0.837299	3.55727	0.000374728	0.00114797
HORVU2Hr1G101150	35.4181	3.35309	0.445456	7.52734	5.1785e-14	4.44611e-13
HORVU2Hr1G101660	3.69846	4.406	1.54408	2.85348	0.00432438	0.0106749
HORVU2Hr1G101710	67.2443	-1.70338	0.233531	-7.29401	3.00867e-13	2.44229e-12
HORVU2Hr1G101800	50.063	1.07123	0.291037	3.68072	0.000232572	0.00073971
HORVU2Hr1G101920	114.677	2.25972	0.22573	10.0107	1.3677e-23	1.98425e-22
HORVU2Hr1G101980	418.048	1.0291	0.118181	8.70786	3.09679e-18	3.43261e-17
HORVU2Hr1G101990	194.253	1.15088	0.183628	6.26742	3.67084e-10	2.35348e-09
HORVU2Hr1G102010	7.41192	2.28465	0.931804	2.45186	0.0142119	0.0309831
HORVU2Hr1G102100	18.7834	-2.13399	0.519945	-4.10427	4.05597e-05	0.000147261
HORVU2Hr1G102190	110.138	-1.90035	0.315225	-6.02854	1.65445e-09	1.00234e-08
HORVU2Hr1G102580	112.139	1.14184	0.213599	5.34575	9.00432e-08	4.60633e-07
HORVU2Hr1G102710	202.574	1.50963	0.163564	9.22963	2.71564e-20	3.34128e-19
HORVU2Hr1G102720	104.66	1.98548	0.205236	9.6741	3.88503e-22	5.27098e-21
HORVU2Hr1G102960	14.8246	1.56198	0.490813	3.18244	0.00146042	0.00400965
HORVU2Hr1G103310	4193.7	1.23902	0.126131	9.82333	8.93434e-23	1.24821e-21
HORVU2Hr1G103710	3.50506	3.29168	1.30808	2.51642	0.0118555	0.0264068
HORVU2Hr1G103780	21.8552	1.83003	0.406103	4.50632	6.59624e-06	2.70583e-05
HORVU2Hr1G104100	24.5682	4.73423	0.674285	7.02111	2.20112e-12	1.67847e-11
HORVU2Hr1G104110	1054.48	1.13611	0.0709715	16.008	1.12423e-57	4.31287e-56
HORVU2Hr1G104470	37.7388	1.15507	0.321054	3.59773	0.000321001	0.000994966
HORVU2Hr1G105060	64.1241	1.21934	0.277917	4.38743	1.14698e-05	4.54363e-05
HORVU2Hr1G105430	1296.64	1.18819	0.0877332	13.5432	8.69325e-42	2.3589e-40
HORVU2Hr1G105480	11.5427	-1.90927	0.548301	-3.48215	0.000497402	0.00148925
HORVU2Hr1G105510	3.2135	4.78787	1.36889	3.49762	0.000469421	0.00141187
HORVU2Hr1G105720	16.1896	2.20162	0.446563	4.93014	8.21699e-07	3.76769e-06
HORVU2Hr1G105780	18.7008	1.21222	0.466594	2.59802	0.00937634	0.0213874
HORVU2Hr1G106040	44.7934	-1.03751	0.306776	-3.38196	0.000719698	0.00209372
HORVU2Hr1G106300	41.3413	2.46943	0.319212	7.73602	1.02579e-14	9.2034e-14
HORVU2Hr1G106380	138.281	1.52948	0.196226	7.79448	6.46726e-15	5.88484e-14
HORVU2Hr1G106760	3.24821	5.64437	1.4079	4.00907	6.09573e-05	0.000215723
HORVU2Hr1G107140	4.96554	2.69228	1.06706	2.52309	0.0116328	0.0259656
HORVU2Hr1G107150	33.0683	1.86363	0.345331	5.39664	6.79021e-08	3.53004e-07
HORVU2Hr1G107220	42.7089	1.5515	0.287292	5.40041	6.64886e-08	3.45996e-07
HORVU2Hr1G107250	1824.69	1.51829	0.0758227	20.0242	3.38951e-89	2.29639e-87
HORVU2Hr1G107560	35.213	1.18458	0.322995	3.66749	0.00024494	0.000776242
HORVU2Hr1G107600	6.94054	4.74386	1.3419	3.53517	0.000407508	0.00124072
HORVU2Hr1G107750	39.0619	1.34167	0.322638	4.15844	3.20433e-05	0.000118229
HORVU2Hr1G108170	9.66585	1.54837	0.607885	2.54714	0.0108608	0.0244334
HORVU2Hr1G108350	61.4367	1.01574	0.25321	4.01146	6.03444e-05	0.00021359
HORVU2Hr1G108400	18.4194	2.00444	0.493213	4.06405	4.82291e-05	0.00017332
HORVU2Hr1G108530	54.4201	4.7013	0.435013	10.8073	3.17995e-27	5.4077e-26
HORVU2Hr1G108670	7.06949	6.70015	1.28397	5.21832	1.80555e-07	8.92137e-07
HORVU2Hr1G108690	14.9319	5.78395	1.08701	5.32097	1.03216e-07	5.23965e-07
HORVU2Hr1G108820	13.4371	2.09086	0.632582	3.30528	0.000948824	0.00269791
HORVU2Hr1G109040	428.473	-1.53871	0.143219	-10.7437	6.34261e-27	1.06744e-25
HORVU2Hr1G109150	25.8655	1.14758	0.406205	2.82513	0.00472621	0.0115802
HORVU2Hr1G109370	310.545	1.12571	0.13461	8.36273	6.12809e-17	6.29119e-16
HORVU2Hr1G109430	282.84	1.77172	0.140292	12.6288	1.46578e-36	3.3899e-35
HORVU2Hr1G109440	334.152	2.3029	0.180121	12.7853	1.98086e-37	4.69938e-36
HORVU2Hr1G109470	153.468	2.85021	0.239999	11.8759	1.57884e-32	3.24646e-31
HORVU2Hr1G109590	643.252	2.44285	0.150121	16.2726	1.54554e-59	6.21095e-58
HORVU2Hr1G109640	3433.03	3.6753	0.104603	35.1355	1.93261e-270	7.42755e-268
HORVU2Hr1G109780	175.034	1.46534	0.191322	7.65902	1.87351e-14	1.65562e-13
HORVU2Hr1G110080	2446.78	5.29222	0.0980465	53.9766	0	0
HORVU2Hr1G110430	56.8796	-1.87007	0.278771	-6.70825	1.96979e-11	1.40052e-10
HORVU2Hr1G111140	198.225	1.20085	0.168475	7.12777	1.02007e-12	7.95655e-12
HORVU2Hr1G111750	15.4601	4.13288	0.800313	5.16408	2.41621e-07	1.17573e-06
HORVU2Hr1G111760	138.629	2.73444	0.195174	14.0103	1.34912e-44	3.93349e-43
HORVU2Hr1G111780	38.7779	1.4229	0.312768	4.54938	5.38036e-06	2.23658e-05
HORVU2Hr1G112040	79.0375	2.42763	0.26216	9.26011	2.04219e-20	2.52444e-19
HORVU2Hr1G112070	3.44023	5.27259	1.47421	3.57654	0.000348168	0.00107439
HORVU2Hr1G112090	78.3926	1.49409	0.203616	7.33779	2.17147e-13	1.77978e-12
HORVU2Hr1G112120	67.3286	2.28223	0.310325	7.35433	1.91889e-13	1.57704e-12
HORVU2Hr1G112230	291.377	1.94227	0.136855	14.1922	1.02348e-45	3.07306e-44
HORVU2Hr1G112380	17.4948	1.27783	0.452654	2.82297	0.0047581	0.0116503
HORVU2Hr1G112830	4.31836	3.15891	1.14968	2.74766	0.00600229	0.014325
HORVU2Hr1G113100	41.6533	1.23285	0.269394	4.57638	4.73092e-06	1.98024e-05
HORVU2Hr1G113120	138.013	3.92074	0.232406	16.8702	7.45704e-64	3.27707e-62
HORVU2Hr1G113200	8.5137	-1.61935	0.651824	-2.48434	0.0129792	0.0286085
HORVU2Hr1G113250	6.93885	4.23077	1.15232	3.67152	0.000241117	0.000765044
HORVU2Hr1G113410	54.8256	1.03992	0.264594	3.93026	8.48531e-05	0.000293748
HORVU2Hr1G114070	21.9567	1.72652	0.422861	4.08296	4.44655e-05	0.000160586
HORVU2Hr1G114100	96.1825	2.13936	0.260634	8.20829	2.24369e-16	2.24241e-15
HORVU2Hr1G114220	15.0405	3.82487	0.819134	4.6694	3.02075e-06	1.29545e-05
HORVU2Hr1G114440	185.489	1.88174	0.170222	11.0546	2.08254e-28	3.68683e-27
HORVU2Hr1G114450	127.687	1.14835	0.200817	5.7184	1.07533e-08	6.03084e-08
HORVU2Hr1G114590	298.847	1.05252	0.126177	8.34162	7.32803e-17	7.49033e-16
HORVU2Hr1G114900	12.8101	2.80664	0.715456	3.92287	8.75008e-05	0.00030227
HORVU2Hr1G114960	310.681	-1.0291	0.180576	-5.69897	1.20536e-08	6.7333e-08
HORVU2Hr1G114970	19.6244	-1.70459	0.487291	-3.4981	0.000468593	0.00140958
HORVU2Hr1G115180	16.0607	2.94582	0.59407	4.95872	7.09598e-07	3.27858e-06
HORVU2Hr1G115240	25.549	1.93001	0.526774	3.66384	0.000248463	0.000786075
HORVU2Hr1G115360	38.7541	2.42642	0.390996	6.20576	5.44345e-10	3.44605e-09
HORVU2Hr1G115640	645.583	1.20292	0.0849414	14.1618	1.57944e-45	4.72223e-44
HORVU2Hr1G115670	32.6458	1.52184	0.339217	4.48633	7.24598e-06	2.95572e-05
HORVU2Hr1G115920	125.124	1.22339	0.2078	5.88736	3.92409e-09	2.2901e-08
HORVU2Hr1G116250	27.2153	2.72673	0.453525	6.0123	1.82915e-09	1.10439e-08
HORVU2Hr1G116300	148.195	1.97839	0.300506	6.58354	4.59376e-11	3.16812e-10
HORVU2Hr1G116670	42.0537	-1.62947	0.308596	-5.28028	1.28987e-07	6.47632e-07
HORVU2Hr1G116910	1327.18	1.28599	0.0712407	18.0514	7.69844e-73	4.0581e-71
HORVU2Hr1G116970	46.1972	3.65635	0.41279	8.85765	8.17158e-19	9.31164e-18
HORVU2Hr1G116980	6.54389	-2.31051	0.792711	-2.9147	0.0035603	0.00898491
HORVU2Hr1G117080	19.5951	1.62494	0.504233	3.2226	0.00127031	0.00353081
HORVU2Hr1G117270	5.32219	2.33551	0.924843	2.5253	0.01156	0.0258249
HORVU2Hr1G117380	60.1692	-1.06664	0.234113	-4.5561	5.21116e-06	2.1718e-05
HORVU2Hr1G117490	104.582	2.2096	0.204602	10.7995	3.46039e-27	5.87988e-26
HORVU2Hr1G117610	35.746	-1.30038	0.349179	-3.7241	0.000196015	0.000633347
HORVU2Hr1G117620	12.9139	4.67556	0.925819	5.05019	4.41378e-07	2.08815e-06
HORVU2Hr1G117680	15.968	1.73817	0.452081	3.84481	0.000120645	0.000405758
HORVU2Hr1G117840	58.0057	1.01576	0.249011	4.07918	4.51957e-05	0.000162917
HORVU2Hr1G117940	1412.76	3.15603	0.137634	22.9306	2.30246e-116	2.21224e-114
HORVU2Hr1G118010	1922.39	5.12477	0.123619	41.4563	0	0
HORVU2Hr1G118050	190.318	2.54128	0.204485	12.4277	1.84803e-35	4.14249e-34
HORVU2Hr1G118060	551.731	1.54667	0.108272	14.285	2.71215e-46	8.30861e-45
HORVU2Hr1G118080	691.121	3.05602	0.111036	27.5226	9.41102e-167	1.48455e-164
HORVU2Hr1G118110	661.216	1.31643	0.0848776	15.5098	2.97978e-54	1.0586e-52
HORVU2Hr1G118120	118.355	1.07819	0.207866	5.18694	2.13776e-07	1.04674e-06
HORVU2Hr1G118230	106.7	1.23216	0.216002	5.7044	1.1675e-08	6.52875e-08
HORVU2Hr1G118590	31.3287	-1.11544	0.321983	-3.46428	0.000531661	0.00158263
HORVU2Hr1G118600	23.7524	1.36673	0.423454	3.22757	0.00124846	0.00347556
HORVU2Hr1G118780	77.2661	-1.21669	0.210727	-5.77378	7.7511e-09	4.39965e-08
HORVU2Hr1G118910	11.9019	-1.2179	0.499779	-2.43687	0.0148151	0.0321487
HORVU2Hr1G119050	451.516	1.04395	0.136392	7.65404	1.94763e-14	1.72039e-13
HORVU2Hr1G119700	126.062	-1.60736	0.236712	-6.79034	1.11869e-11	8.14009e-11
HORVU2Hr1G119760	251.926	-1.10904	0.186676	-5.94095	2.83367e-09	1.68065e-08
ENSRNA049481312	25.4389	-2.71629	0.534547	-5.08148	3.74498e-07	1.78573e-06
ENSRNA049481293	21.0724	-2.39726	0.476473	-5.03125	4.87291e-07	2.29458e-06
ENSRNA049481304	17.1825	-2.41216	0.508407	-4.74454	2.0898e-06	9.125e-06
ENSRNA049481301	19.0613	-1.37912	0.447532	-3.08161	0.00205885	0.00548042
HORVU2Hr1G120260	112.675	1.0796	0.206163	5.23663	1.63539e-07	8.13767e-07
HORVU2Hr1G120410	68.0475	2.62922	0.311224	8.448	2.96333e-17	3.11017e-16
HORVU2Hr1G120420	181.509	2.71314	0.178488	15.2007	3.50109e-52	1.19751e-50
HORVU2Hr1G121060	1828.63	1.07406	0.0850575	12.6275	1.48932e-36	3.43683e-35
HORVU2Hr1G121170	65.2943	1.99899	0.378042	5.28775	1.23832e-07	6.23227e-07
HORVU2Hr1G121200	238.291	-1.39184	0.165773	-8.3961	4.61565e-17	4.78263e-16
HORVU2Hr1G121290	6.55024	5.17765	1.3818	3.74702	0.000178947	0.000583913
HORVU2Hr1G121340	18.8434	3.61664	0.607105	5.95719	2.56608e-09	1.5288e-08
HORVU2Hr1G121650	84.0241	-1.86354	0.617741	-3.0167	0.00255543	0.00666955
HORVU2Hr1G121740	10.7086	-1.64987	0.660196	-2.49906	0.0124525	0.0275739
ENSRNA049482271	133.791	-1.46954	0.643137	-2.28496	0.0223151	0.0462447
HORVU2Hr1G121990	6174.38	1.81619	0.059545	30.5011	2.51613e-204	5.31859e-202
HORVU2Hr1G122030	5.71232	-1.9755	0.843569	-2.34184	0.019189	0.0404116
HORVU2Hr1G122140	53.6297	-1.22024	0.286981	-4.252	2.11874e-05	8.04634e-05
HORVU2Hr1G122270	254.509	3.02589	0.161685	18.7147	3.75722e-78	2.14649e-76
HORVU2Hr1G122300	14.7254	4.45331	0.832061	5.35214	8.69185e-08	4.45402e-07
HORVU2Hr1G122470	768.161	1.5915	0.0894634	17.7893	8.54693e-71	4.33249e-69
HORVU2Hr1G122490	25.7421	2.93831	0.525994	5.58621	2.32082e-08	1.25821e-07
HORVU2Hr1G122580	15.3473	3.13595	0.593876	5.28047	1.28852e-07	6.47107e-07
HORVU2Hr1G122620	6.00674	2.4284	0.811653	2.99191	0.00277234	0.00717455
HORVU2Hr1G122760	5.4976	3.21784	0.938025	3.43044	0.000602592	0.00177924
HORVU2Hr1G122780	4.16779	5.729	1.4665	3.90658	9.36129e-05	0.000321545
HORVU2Hr1G122920	30.7879	-1.10961	0.314321	-3.53017	0.000415292	0.00126163
HORVU2Hr1G123030	223.315	3.6324	0.17938	20.2498	3.5692e-91	2.48176e-89
HORVU2Hr1G123160	16.779	2.2475	0.49648	4.52688	5.98608e-06	2.47185e-05
HORVU2Hr1G123310	8.66473	4.20028	1.02676	4.09082	4.29859e-05	0.000155535
HORVU2Hr1G123350	388.002	1.1057	0.130313	8.48494	2.15826e-17	2.27992e-16
HORVU2Hr1G123480	332.854	1.79361	0.142036	12.6279	1.48256e-36	3.42496e-35
HORVU2Hr1G123590	679.209	2.20679	0.0857097	25.7472	3.4624e-146	4.40893e-144
HORVU2Hr1G123770	348.341	1.64964	0.12804	12.8838	5.55269e-38	1.35222e-36
HORVU2Hr1G123980	22.753	2.29395	0.486489	4.71531	2.41343e-06	1.04453e-05
HORVU2Hr1G124130	7.54009	1.83875	0.803016	2.28981	0.0220323	0.0457305
HORVU2Hr1G124190	21.0975	1.5719	0.423419	3.71241	0.000205298	0.000660717
HORVU2Hr1G124200	7.94825	1.79673	0.702283	2.55842	0.0105149	0.0237159
HORVU2Hr1G124250	3.39906	4.03848	1.40221	2.88009	0.00397564	0.00991355
HORVU2Hr1G124430	354.785	3.48108	0.153445	22.6863	6.12107e-114	5.67488e-112
HORVU2Hr1G124530	293.192	-1.41289	0.127903	-11.0465	2.2785e-28	4.02701e-27
HORVU2Hr1G124930	180.138	1.02578	0.139475	7.35456	1.9155e-13	1.57487e-12
HORVU2Hr1G124960	26.9138	3.17548	0.485218	6.54443	5.97208e-11	4.08536e-10
HORVU2Hr1G124970	6.34168	2.13444	0.88716	2.40593	0.0161314	0.0346989
HORVU2Hr1G125120	3.49468	4.04059	1.51263	2.67124	0.00755709	0.0176588
HORVU2Hr1G125180	100.717	1.09134	0.214168	5.09572	3.47415e-07	1.66184e-06
HORVU2Hr1G125230	534.922	5.42821	0.177907	30.5116	1.82874e-204	3.90464e-202
HORVU2Hr1G125250	2707.93	3.23008	0.0822666	39.2636	0	0
HORVU2Hr1G125600	464.932	5.5426	0.218639	25.3504	8.88829e-142	1.08602e-139
HORVU2Hr1G126040	131.936	-1.23668	0.165913	-7.45376	9.07198e-14	7.62783e-13
HORVU2Hr1G126150	125.064	6.24827	0.450495	13.8698	9.65419e-44	2.75771e-42
HORVU2Hr1G126250	7.55808	4.22332	0.981581	4.30257	1.68827e-05	6.50859e-05
HORVU2Hr1G126510	123.45	1.06782	0.280822	3.8025	0.000143242	0.000475255
HORVU2Hr1G126810	767.008	1.16279	0.10297	11.2925	1.42918e-29	2.63612e-28
HORVU2Hr1G126950	7.53322	1.78502	0.732233	2.43778	0.0147779	0.032078
HORVU2Hr1G127100	212.388	1.21858	0.124884	9.75767	1.71041e-22	2.35843e-21
HORVU2Hr1G127120	85.9931	1.01932	0.239871	4.24944	2.14305e-05	8.12551e-05
HORVU3Hr1G000110	14.4599	2.78157	0.556327	4.99988	5.73664e-07	2.68039e-06
HORVU3Hr1G000150	35.3201	1.14057	0.351102	3.24855	0.00115995	0.003251
HORVU3Hr1G000280	6.61909	-1.8153	0.713325	-2.54485	0.0109326	0.0245765
HORVU3Hr1G000600	25.4783	1.08898	0.35789	3.04276	0.00234417	0.00617612
HORVU3Hr1G000720	130.736	1.33885	0.209069	6.40387	1.51489e-10	1.00131e-09
HORVU3Hr1G000980	21.1573	4.31446	0.630907	6.83851	8.00225e-12	5.86924e-11
HORVU3Hr1G001020	1033.99	6.08702	0.151966	40.0551	0	0
HORVU3Hr1G001030	208.651	1.20849	0.159958	7.55504	4.18721e-14	3.62594e-13
HORVU3Hr1G001060	2244.42	3.6816	0.0942722	39.0529	0	0
HORVU3Hr1G001390	59.7513	3.74288	0.340514	10.9918	4.18292e-28	7.33155e-27
HORVU3Hr1G001400	95.2434	6.03524	0.492345	12.2582	1.51924e-34	3.3313e-33
HORVU3Hr1G002040	99.1459	1.16441	0.213082	5.46464	4.63844e-08	2.44446e-07
HORVU3Hr1G002050	23.576	1.13626	0.436808	2.60128	0.0092876	0.0211941
HORVU3Hr1G002080	102.159	1.59947	0.19548	8.18228	2.78533e-16	2.76545e-15
HORVU3Hr1G002130	14.195	2.24817	0.637368	3.52727	0.000419863	0.00127424
HORVU3Hr1G002220	54.6582	2.59749	0.298239	8.7094	3.05481e-18	3.38964e-17
HORVU3Hr1G002370	23.6132	2.12418	0.468828	4.53084	5.87509e-06	2.43076e-05
HORVU3Hr1G002490	94.9984	1.60525	0.215328	7.45491	8.99285e-14	7.56731e-13
HORVU3Hr1G002530	364.209	1.98262	0.119538	16.5856	8.852e-62	3.7573e-60
HORVU3Hr1G002820	1431.4	1.55542	0.0770988	20.1744	1.64255e-90	1.13837e-88
HORVU3Hr1G002900	185.724	2.16189	0.195014	11.0858	1.46968e-28	2.61279e-27
HORVU3Hr1G002980	259.526	-1.09908	0.127331	-8.63171	6.04404e-18	6.59231e-17
HORVU3Hr1G003110	193.333	1.14584	0.140896	8.13253	4.20405e-16	4.12368e-15
HORVU3Hr1G003400	67.2285	-1.21294	0.296954	-4.08459	4.41551e-05	0.000159575
HORVU3Hr1G003810	16.2145	1.6655	0.589746	2.8241	0.00474138	0.011612
HORVU3Hr1G003860	20.8414	-1.65849	0.48124	-3.44629	0.00056835	0.00168496
HORVU3Hr1G003920	423.62	1.64522	0.105787	15.5522	1.53803e-54	5.47322e-53
HORVU3Hr1G003950	4.04046	-3.11886	1.11824	-2.78906	0.00528605	0.0127933
HORVU3Hr1G003980	195.327	1.15163	0.144947	7.94521	1.93864e-15	1.82291e-14
HORVU3Hr1G004110	3.78561	5.49774	1.41875	3.87507	0.000106596	0.000362255
HORVU3Hr1G004130	43.7378	4.49111	0.496228	9.0505	1.42316e-19	1.69004e-18
HORVU3Hr1G004140	38.7932	1.34216	0.405442	3.31036	0.000931761	0.00265332
HORVU3Hr1G004220	34.011	2.23042	0.375647	5.93754	2.89332e-09	1.71266e-08
HORVU3Hr1G004830	180.993	1.47004	0.151041	9.73268	2.18742e-22	2.99856e-21
HORVU3Hr1G005800	51.5462	1.79622	0.279414	6.42853	1.28846e-10	8.57e-10
HORVU3Hr1G005990	22.6762	-1.88749	0.428738	-4.40244	1.07041e-05	4.26029e-05
HORVU3Hr1G006130	638.26	2.20584	0.0989921	22.283	5.39794e-110	4.75423e-108
HORVU3Hr1G006140	945.49	1.67584	0.260526	6.43252	1.25503e-10	8.35028e-10
HORVU3Hr1G006290	1624.41	1.61603	0.101617	15.9032	6.02182e-57	2.24893e-55
HORVU3Hr1G006410	163.05	7.07201	0.49717	14.2245	6.45349e-46	1.95435e-44
HORVU3Hr1G006440	656.426	4.67769	0.13552	34.5165	4.53757e-261	1.57238e-258
HORVU3Hr1G006450	600.718	4.07449	0.121033	33.6642	1.9326e-248	6.00756e-246
HORVU3Hr1G006620	42.7731	4.33976	0.466281	9.30718	1.31275e-20	1.63904e-19
HORVU3Hr1G006640	257.406	2.20555	0.139203	15.8441	1.54475e-56	5.72859e-55
HORVU3Hr1G006730	10.9319	3.03434	0.838063	3.62066	0.000293855	0.000918183
HORVU3Hr1G006740	296.828	2.18328	0.160307	13.6193	3.07389e-42	8.46042e-41
HORVU3Hr1G006760	77.8591	2.19673	0.25376	8.65669	4.85643e-18	5.3272e-17
HORVU3Hr1G006800	17.8214	6.02578	1.07893	5.58495	2.33765e-08	1.26668e-07
HORVU3Hr1G006940	1888.74	1.91157	0.1216	15.7201	1.1015e-55	4.04227e-54
HORVU3Hr1G007290	465.313	3.00187	0.131432	22.8397	1.84814e-115	1.75184e-113
HORVU3Hr1G007420	249.649	2.52982	0.148164	17.0745	2.29735e-65	1.04658e-63
HORVU3Hr1G007460	57.1437	2.22254	0.654373	3.39645	0.000682669	0.00199368
HORVU3Hr1G007590	398.992	3.35165	0.194314	17.2486	1.14612e-66	5.32453e-65
HORVU3Hr1G007680	736.772	1.33701	0.0836787	15.9779	1.82097e-57	6.92296e-56
HORVU3Hr1G007720	77.386	2.33803	0.265899	8.7929	1.45747e-18	1.6431e-17
HORVU3Hr1G007830	188.936	-1.04781	0.231342	-4.52927	5.91865e-06	2.44735e-05
HORVU3Hr1G007920	26.3402	4.07112	0.540663	7.52987	5.07922e-14	4.36619e-13
HORVU3Hr1G009360	6346.67	1.14467	0.145339	7.87589	3.38337e-15	3.13812e-14
HORVU3Hr1G009490	781.112	1.04454	0.119524	8.73918	2.3481e-18	2.6206e-17
HORVU3Hr1G010240	34.6761	7.88547	1.19848	6.57958	4.71777e-11	3.24835e-10
HORVU3Hr1G010540	147.792	-1.77231	0.165371	-10.7172	8.4529e-27	1.41247e-25
HORVU3Hr1G010570	1386.01	1.0097	0.0645995	15.6301	4.54322e-55	1.64443e-53
HORVU3Hr1G010830	102.837	-1.64184	0.205969	-7.9713	1.57019e-15	1.48715e-14
HORVU3Hr1G010920	6.01947	2.13218	0.775208	2.75047	0.00595106	0.0142111
HORVU3Hr1G011030	116.684	-1.59747	0.248785	-6.42107	1.35318e-10	8.98633e-10
HORVU3Hr1G011260	37.0956	-1.4195	0.338149	-4.19784	2.69477e-05	0.000100569
HORVU3Hr1G011820	6.67164	2.3331	0.879452	2.6529	0.00798028	0.0185534
HORVU3Hr1G011850	14.173	1.4386	0.499154	2.88207	0.00395069	0.00985831
HORVU3Hr1G011870	467.57	2.46852	0.129367	19.0816	3.59309e-81	2.12747e-79
HORVU3Hr1G011970	11.6481	2.86314	0.784782	3.64833	0.000263953	0.000830768
HORVU3Hr1G012000	24.9192	1.02408	0.370608	2.76324	0.0057231	0.0137399
HORVU3Hr1G012080	21.9879	1.2055	0.407064	2.96145	0.00306194	0.00785192
HORVU3Hr1G013100	337.767	1.05421	0.110763	9.51777	1.7694e-21	2.2988e-20
HORVU3Hr1G013180	88.1814	2.52873	0.237928	10.6282	2.20425e-26	3.62877e-25
HORVU3Hr1G013270	63.9815	1.46517	0.24124	6.0735	1.25149e-09	7.66338e-09
HORVU3Hr1G013380	2031.5	4.33436	0.122514	35.3786	3.64679e-274	1.45445e-271
HORVU3Hr1G013390	641.018	1.54947	0.0990942	15.6363	4.11841e-55	1.49579e-53
HORVU3Hr1G013750	7.87423	4.15739	1.20093	3.46182	0.000536541	0.00159513
HORVU3Hr1G013880	2246.37	1.01212	0.075344	13.4333	3.85741e-41	1.04106e-39
HORVU3Hr1G013970	3947.38	-1.23326	0.0711686	-17.3288	2.85307e-67	1.34616e-65
HORVU3Hr1G014140	19.852	3.5531	0.54935	6.46783	9.94226e-11	6.66538e-10
HORVU3Hr1G014270	187.482	1.24441	0.210469	5.91256	3.36824e-09	1.97881e-08
HORVU3Hr1G014890	484.599	1.84966	0.134636	13.7382	5.99458e-43	1.67389e-41
HORVU3Hr1G015680	16.5157	3.71411	0.703242	5.28141	1.28192e-07	6.43943e-07
HORVU3Hr1G015770	28.1087	2.25352	0.443425	5.08208	3.7332e-07	1.78051e-06
HORVU3Hr1G015780	64.7318	2.66669	0.302514	8.81509	1.1959e-18	1.35326e-17
HORVU3Hr1G016320	17.5084	1.94539	0.532513	3.65323	0.000258967	0.000816777
HORVU3Hr1G016490	418.654	-1.14104	0.105714	-10.7937	3.68752e-27	6.25576e-26
HORVU3Hr1G016860	1402.59	1.34901	0.0683528	19.736	1.05741e-86	6.83536e-85
HORVU3Hr1G017020	1797.8	1.21926	0.105243	11.5852	4.89697e-31	9.61116e-30
HORVU3Hr1G017330	944.178	1.16246	0.0960948	12.097	1.09504e-33	2.33808e-32
HORVU3Hr1G017940	7.59785	1.70431	0.67148	2.53815	0.0111442	0.0250043
HORVU3Hr1G018390	206.462	1.89139	0.148511	12.7357	3.7468e-37	8.79021e-36
HORVU3Hr1G018430	111.146	1.92477	0.224454	8.57534	9.8795e-18	1.0633e-16
HORVU3Hr1G018650	595.998	1.25287	0.0948611	13.2075	7.94632e-40	2.05342e-38
HORVU3Hr1G018810	343.505	1.09758	0.178743	6.14057	8.22261e-10	5.12561e-09
HORVU3Hr1G018820	258.967	1.05795	0.209181	5.0576	4.24566e-07	2.01266e-06
HORVU3Hr1G018980	37.325	4.14625	0.461049	8.99307	2.40413e-19	2.82639e-18
HORVU3Hr1G019140	72.1883	1.0343	0.248667	4.15936	3.19136e-05	0.00011777
HORVU3Hr1G019210	3.7403	3.10045	1.26063	2.45945	0.0139149	0.0304076
HORVU3Hr1G019230	336.21	2.02228	0.139138	14.5344	7.33861e-48	2.31874e-46
HORVU3Hr1G019330	169.001	1.14806	0.140435	8.17504	2.9578e-16	2.93392e-15
HORVU3Hr1G019840	146.243	1.30143	0.175194	7.42854	1.09807e-13	9.16344e-13
HORVU3Hr1G020090	4.94268	3.14638	1.23155	2.5548	0.0106249	0.0239459
HORVU3Hr1G020140	98.9139	1.87796	0.218751	8.58492	9.08964e-18	9.81291e-17
HORVU3Hr1G020210	12.9928	2.01318	0.529574	3.8015	0.000143821	0.000477025
HORVU3Hr1G020230	1410.34	1.81389	0.106814	16.9817	1.12149e-64	5.03313e-63
HORVU3Hr1G020300	11.1554	-1.82127	0.558435	-3.26139	0.00110869	0.00311975
HORVU3Hr1G020390	130.11	1.98806	0.179447	11.0788	1.59016e-28	2.81986e-27
HORVU3Hr1G020500	17.179	2.17711	0.541381	4.02141	5.78515e-05	0.000205179
HORVU3Hr1G020520	4.39255	2.78976	1.08516	2.57083	0.0101455	0.0229782
HORVU3Hr1G020850	180.987	-5.94978	0.348843	-17.0557	3.1681e-65	1.43707e-63
HORVU3Hr1G021270	38.724	-1.00732	0.374615	-2.68894	0.007168	0.0168483
HORVU3Hr1G021750	5057.91	-1.46529	0.0692721	-21.1527	2.6068e-99	2.04084e-97
HORVU3Hr1G022260	206.088	1.63208	0.140505	11.6158	3.42582e-31	6.75513e-30
HORVU3Hr1G022340	53.6896	1.2156	0.293247	4.14531	3.39361e-05	0.000124646
HORVU3Hr1G022640	555.919	1.24432	0.10274	12.1113	9.19836e-34	1.97396e-32
HORVU3Hr1G022780	59.2873	2.8241	0.308409	9.15701	5.33575e-20	6.45605e-19
HORVU3Hr1G022840	58.1812	-1.18382	0.244614	-4.83953	1.30144e-06	5.84696e-06
HORVU3Hr1G023230	274.965	1.42515	0.145001	9.82855	8.48285e-23	1.18749e-21
HORVU3Hr1G023400	346.392	1.93096	0.130016	14.8518	6.77471e-50	2.19975e-48
HORVU3Hr1G023590	60.5966	-1.19844	0.2592	-4.62362	3.77099e-06	1.59806e-05
HORVU3Hr1G023780	252.039	2.57742	0.141424	18.2248	3.28348e-74	1.77509e-72
HORVU3Hr1G023910	176.966	-1.7904	0.15711	-11.3958	4.38748e-30	8.22915e-29
HORVU3Hr1G024210	1854.96	1.09962	0.0730992	15.0428	3.84628e-51	1.29052e-49
HORVU3Hr1G024650	855.276	3.46191	0.105915	32.6858	2.48738e-234	6.9182e-232
HORVU3Hr1G024660	41.9766	1.43174	0.336572	4.25388	2.10095e-05	7.98884e-05
HORVU3Hr1G024820	92.1603	3.80731	0.290926	13.0869	3.91482e-39	9.89849e-38
HORVU3Hr1G024970	124.526	-1.05831	0.174282	-6.07237	1.26038e-09	7.71556e-09
HORVU3Hr1G025090	9.88416	1.61217	0.706063	2.28333	0.0224112	0.0464257
HORVU3Hr1G025810	39.2045	4.52442	0.524994	8.61804	6.81115e-18	7.40989e-17
HORVU3Hr1G025950	33.0363	1.58772	0.375604	4.2271	2.36718e-05	8.92092e-05
HORVU3Hr1G026050	10.8363	2.03539	0.681592	2.98623	0.00282436	0.00729578
HORVU3Hr1G026210	293.447	-1.37701	0.223505	-6.16098	7.22942e-10	4.52652e-09
HORVU3Hr1G026270	11.6046	1.50021	0.514997	2.91304	0.00357924	0.0090284
HORVU3Hr1G026330	395.784	2.40145	0.143768	16.7037	1.2328e-62	5.32901e-61
HORVU3Hr1G026560	4.54581	-2.63127	0.95243	-2.7627	0.00573262	0.0137559
HORVU3Hr1G026840	43.9927	1.33601	0.264875	5.04393	4.56057e-07	2.15326e-06
HORVU3Hr1G026920	17462.9	-1.71428	0.0762386	-22.4857	5.72408e-112	5.12693e-110
HORVU3Hr1G027030	116.312	1.47951	0.196999	7.51024	5.90198e-14	5.03658e-13
HORVU3Hr1G027430	49.4475	2.00443	0.298683	6.71088	1.93451e-11	1.37636e-10
HORVU3Hr1G027700	3355.38	1.47275	0.0801291	18.3797	1.91043e-75	1.0489e-73
HORVU3Hr1G028020	254.84	2.61996	0.160838	16.2894	1.1728e-59	4.72204e-58
HORVU3Hr1G028260	51.8474	2.03812	0.281943	7.22884	4.87139e-13	3.89454e-12
HORVU3Hr1G028280	225.674	1.85159	0.16301	11.3588	6.70853e-30	1.245e-28
HORVU3Hr1G028620	399.893	1.1845	0.130548	9.07329	1.15481e-19	1.37678e-18
HORVU3Hr1G028860	726.805	2.3257	0.108414	21.452	4.37354e-102	3.49796e-100
HORVU3Hr1G029910	5.36547	3.9854	1.32553	3.00665	0.00264141	0.00686599
HORVU3Hr1G030070	18.8804	-1.31136	0.389204	-3.36933	0.000753506	0.00218306
HORVU3Hr1G030100	177.226	2.07102	0.165922	12.4819	9.37329e-36	2.1168e-34
HORVU3Hr1G030340	90.4698	-2.01697	0.214065	-9.42225	4.41529e-21	5.65638e-20
HORVU3Hr1G030540	564.538	-1.26989	0.316938	-4.00673	6.15653e-05	0.00021762
HORVU3Hr1G030580	1791.59	-1.04996	0.139348	-7.53478	4.89164e-14	4.20836e-13
HORVU3Hr1G031020	141.684	1.24273	0.189646	6.55289	5.64334e-11	3.86674e-10
HORVU3Hr1G031260	32.2195	1.14552	0.307582	3.72427	0.000195885	0.000633217
HORVU3Hr1G032050	134.791	1.01901	0.166625	6.11561	9.61888e-10	5.95036e-09
HORVU3Hr1G032370	17.5556	6.90003	1.23443	5.58964	2.27544e-08	1.23487e-07
HORVU3Hr1G032400	12.8396	1.3682	0.554006	2.46965	0.0135244	0.0296555
HORVU3Hr1G033000	10.3174	-1.66166	0.690713	-2.40572	0.0161407	0.0347117
HORVU3Hr1G033150	23.8515	-1.54153	0.48128	-3.20298	0.00136014	0.00375972
HORVU3Hr1G033480	113.625	2.60513	0.219817	11.8514	2.11727e-32	4.32832e-31
HORVU3Hr1G033500	98.58	1.30034	0.240229	5.41293	6.20013e-08	3.23282e-07
HORVU3Hr1G033550	466.281	2.34158	0.104021	22.5105	3.27234e-112	2.95263e-110
HORVU3Hr1G033740	718.9	1.61868	0.09743	16.6137	5.54358e-62	2.37207e-60
HORVU3Hr1G034020	100.961	2.96712	0.260104	11.4075	3.83743e-30	7.236e-29
HORVU3Hr1G034100	299.682	1.77608	0.159259	11.1522	6.98586e-29	1.25781e-27
HORVU3Hr1G034590	11.8697	-2.05009	0.645411	-3.17641	0.00149108	0.00408481
HORVU3Hr1G034880	95.529	-1.62191	0.208214	-7.7896	6.72218e-15	6.10367e-14
HORVU3Hr1G035180	722.813	1.62447	0.0863939	18.8031	7.1265e-79	4.12712e-77
HORVU3Hr1G035210	42.0681	1.41913	0.345823	4.10363	4.06716e-05	0.000147641
HORVU3Hr1G035820	582.334	1.4647	0.100329	14.5989	2.85429e-48	9.08645e-47
HORVU3Hr1G036860	7.05247	3.82946	1.00285	3.81858	0.000134221	0.000447573
HORVU3Hr1G036880	36.4771	7.01174	1.42294	4.92765	8.32254e-07	3.81113e-06
HORVU3Hr1G036960	43.2887	2.32846	0.35775	6.50862	7.58458e-11	5.1402e-10
HORVU3Hr1G038320	29.8036	-1.18618	0.366029	-3.24066	0.00119251	0.0033343
HORVU3Hr1G038480	103.699	3.21423	0.258749	12.4222	1.97995e-35	4.43348e-34
HORVU3Hr1G039300	424.6	-1.09938	0.2167	-5.07327	3.91041e-07	1.86e-06
HORVU3Hr1G040350	471.554	1.70345	0.101338	16.8097	2.07305e-63	9.03506e-62
HORVU3Hr1G040360	831.075	1.05317	0.0857458	12.2825	1.12518e-34	2.47235e-33
HORVU3Hr1G044150	10.8456	2.1457	0.6187	3.46808	0.00052419	0.00156193
HORVU3Hr1G046860	98.4278	1.27432	0.194541	6.5504	5.73833e-11	3.93055e-10
HORVU3Hr1G047180	31.5729	1.13396	0.409501	2.76913	0.00562056	0.0135177
HORVU3Hr1G047220	45.9918	2.26212	0.356035	6.35365	2.10264e-10	1.37645e-09
HORVU3Hr1G048610	979.057	2.32221	0.0896238	25.9106	5.05428e-148	6.55444e-146
HORVU3Hr1G049030	6.36456	1.74106	0.768775	2.26472	0.0235301	0.048487
HORVU3Hr1G049390	169.926	-1.15061	0.147788	-7.78557	6.93998e-15	6.29602e-14
HORVU3Hr1G049920	4.77907	2.91987	1.02831	2.83948	0.00451877	0.0111054
HORVU3Hr1G050590	405.123	2.89459	0.120505	24.0204	1.70231e-127	1.79022e-125
HORVU3Hr1G050770	59.8257	1.69534	0.278125	6.09563	1.09008e-09	6.71e-09
HORVU3Hr1G051110	9.23828	3.7152	0.852544	4.35778	1.31387e-05	5.15263e-05
HORVU3Hr1G051650	7704.03	-1.23085	0.301497	-4.08247	4.45592e-05	0.00016082
HORVU3Hr1G051720	8.54957	4.53073	0.994512	4.55573	5.22036e-06	2.17435e-05
HORVU3Hr1G052300	4.50105	2.65752	1.03279	2.57314	0.0100779	0.0228447
HORVU3Hr1G052490	10.8754	-1.53599	0.629878	-2.43855	0.0147462	0.0320223
HORVU3Hr1G052500	496.494	-1.02066	0.173743	-5.87458	4.23928e-09	2.46625e-08
HORVU3Hr1G052880	149.927	1.19462	0.190896	6.25799	3.89967e-10	2.49414e-09
HORVU3Hr1G053090	409.38	1.38013	0.113636	12.1452	6.08672e-34	1.30968e-32
HORVU3Hr1G053380	5383.63	1.21247	0.0775519	15.6343	4.24969e-55	1.54082e-53
HORVU3Hr1G055420	152.402	1.21072	0.196857	6.15023	7.73683e-10	4.83706e-09
HORVU3Hr1G055830	464.347	1.83307	0.114071	16.0695	4.17468e-58	1.62513e-56
HORVU3Hr1G055870	284.254	1.48497	0.130633	11.3675	6.06716e-30	1.12894e-28
HORVU3Hr1G056540	4.74822	2.20251	0.919463	2.39543	0.0166009	0.0355712
HORVU3Hr1G056630	101.586	2.37932	0.612936	3.88184	0.000103669	0.000353161
HORVU3Hr1G056640	140.551	2.05745	0.224683	9.15714	5.32886e-20	6.4514e-19
HORVU3Hr1G056960	5914.72	-1.64765	0.0443556	-37.1463	5.02675e-302	2.47106e-299
HORVU3Hr1G057540	107.769	1.48434	0.196376	7.55864	4.07298e-14	3.52991e-13
HORVU3Hr1G057920	2.86938	3.68171	1.48525	2.47885	0.0131807	0.028995
HORVU3Hr1G058100	9.7741	2.37814	0.716866	3.31742	0.000908533	0.00259381
HORVU3Hr1G058580	39.7196	1.03984	0.314857	3.30258	0.000958002	0.00272217
HORVU3Hr1G058670	78.327	2.67796	0.283829	9.43514	3.90478e-21	5.00845e-20
HORVU3Hr1G058810	308.761	1.00532	0.146128	6.87972	5.99701e-12	4.45101e-11
HORVU3Hr1G059220	454.347	2.00217	0.129638	15.4443	8.24038e-54	2.9128e-52
HORVU3Hr1G059390	1890.74	-1.20018	0.248862	-4.82268	1.41644e-06	6.32727e-06
HORVU3Hr1G059470	132.722	2.54267	0.190826	13.3245	1.66706e-40	4.38834e-39
HORVU3Hr1G059480	99.8107	5.13415	0.344392	14.9079	2.92938e-50	9.66009e-49
HORVU3Hr1G060500	213.176	1.06384	0.143201	7.42895	1.09463e-13	9.13832e-13
HORVU3Hr1G060570	20.6452	1.01756	0.393783	2.58406	0.00976446	0.0221865
HORVU3Hr1G060600	59.0182	5.733	0.602332	9.51802	1.7651e-21	2.29463e-20
HORVU3Hr1G060760	15.0068	-1.32462	0.489384	-2.7067	0.00679553	0.0160442
HORVU3Hr1G061190	17.4646	1.31971	0.526878	2.50478	0.0122528	0.0271915
HORVU3Hr1G061700	551.646	1.20279	0.0978572	12.2912	1.0095e-34	2.2228e-33
HORVU3Hr1G062430	1937.2	3.59571	0.100367	35.8256	4.40809e-281	1.82703e-278
HORVU3Hr1G062520	67.9542	4.98906	0.407429	12.2452	1.78199e-34	3.89936e-33
HORVU3Hr1G062690	86.5947	1.44446	0.245544	5.88269	4.03645e-09	2.35178e-08
HORVU3Hr1G062730	11.4409	3.02402	0.717543	4.21441	2.5043e-05	9.40246e-05
HORVU3Hr1G062920	97.6673	2.67426	0.286408	9.33723	9.88894e-21	1.24276e-19
HORVU3Hr1G063430	332.241	1.41438	0.103431	13.6747	1.43888e-42	3.99672e-41
HORVU3Hr1G063640	152.692	1.34932	0.167207	8.06979	7.0422e-16	6.81585e-15
HORVU3Hr1G063660	29.4538	1.66943	0.406957	4.10223	4.09191e-05	0.000148514
HORVU3Hr1G064110	435.616	1.6974	0.110639	15.3418	4.02036e-53	1.40235e-51
HORVU3Hr1G064130	858.965	2.65734	0.0949555	27.9851	2.46597e-172	4.00966e-170
HORVU3Hr1G064180	652.664	3.02667	0.108238	27.9632	4.55541e-172	7.35056e-170
HORVU3Hr1G064190	22.4267	2.04705	0.42204	4.85037	1.2323e-06	5.55639e-06
HORVU3Hr1G064320	60.3294	1.86275	0.293638	6.34369	2.24325e-10	1.46532e-09
HORVU3Hr1G064450	50.8153	2.11612	0.336018	6.29763	3.02233e-10	1.95072e-09
HORVU3Hr1G064470	80.736	2.98517	0.259153	11.5189	1.05914e-30	2.05339e-29
HORVU3Hr1G064600	170.892	-1.16463	0.236097	-4.93283	8.10479e-07	3.71947e-06
HORVU3Hr1G064680	253.249	2.83004	0.166577	16.9894	9.83682e-65	4.42406e-63
HORVU3Hr1G064710	55.5239	-1.67125	0.287439	-5.81427	6.0899e-09	3.48668e-08
HORVU3Hr1G064960	86.6336	2.44066	0.243208	10.0353	1.06661e-23	1.5549e-22
HORVU3Hr1G065260	158.75	1.02687	0.173352	5.9236	3.14962e-09	1.85347e-08
HORVU3Hr1G065620	52.7048	1.18511	0.277703	4.26756	1.97624e-05	7.54448e-05
HORVU3Hr1G065630	80.5688	1.75109	0.253305	6.91297	4.74607e-12	3.55123e-11
HORVU3Hr1G065640	50.6419	1.81836	0.342997	5.30138	1.1493e-07	5.80085e-07
HORVU3Hr1G065880	30.9311	1.06794	0.355855	3.00106	0.00269039	0.00697957
HORVU3Hr1G066220	256.325	1.46978	0.128398	11.4471	2.43017e-30	4.62783e-29
HORVU3Hr1G066280	48.7416	2.20298	0.322539	6.83012	8.48451e-12	6.21433e-11
HORVU3Hr1G066880	67.9819	1.37631	0.267882	5.13776	2.7803e-07	1.34362e-06
HORVU3Hr1G067230	10.8198	-1.36262	0.539121	-2.52748	0.0114883	0.0256892
HORVU3Hr1G067330	94.8593	-1.31465	0.221568	-5.93337	2.96773e-09	1.75249e-08
HORVU3Hr1G067510	195.838	3.87619	0.254774	15.2142	2.84509e-52	9.76292e-51
HORVU3Hr1G067540	12.3672	2.8805	0.649213	4.43691	9.12603e-06	3.67021e-05
HORVU3Hr1G067610	4.36456	2.57281	0.981662	2.62087	0.00877059	0.0201711
HORVU3Hr1G067760	913.711	1.66081	0.0935022	17.7623	1.38524e-70	6.98837e-69
HORVU3Hr1G067910	277.932	1.17863	0.148085	7.9591	1.73297e-15	1.63753e-14
HORVU3Hr1G068270	63.3333	1.23856	0.261792	4.73109	2.23313e-06	9.71275e-06
HORVU3Hr1G068430	180.152	1.47071	0.159746	9.20652	3.36884e-20	4.12098e-19
HORVU3Hr1G068560	3.99603	-2.90391	1.05671	-2.74808	0.00599461	0.0143115
HORVU3Hr1G068610	17.7539	-1.85967	0.491487	-3.78376	0.000154477	0.000510377
HORVU3Hr1G068760	61.1462	1.24772	0.261627	4.76908	1.85071e-06	8.15004e-06
HORVU3Hr1G069030	1539.75	1.30298	0.0708642	18.387	1.67094e-75	9.22201e-74
HORVU3Hr1G069140	41.7729	-1.25217	0.326041	-3.84054	0.000122763	0.0004119
HORVU3Hr1G069280	1353.17	-1.14962	0.126732	-9.07125	1.17655e-19	1.4018e-18
HORVU3Hr1G069320	25.7488	2.03801	0.417017	4.88712	1.02322e-06	4.65337e-06
HORVU3Hr1G069430	11.5725	1.60265	0.658274	2.43462	0.0149074	0.0323325
HORVU3Hr1G069720	30.1642	1.69063	0.357461	4.72954	2.25025e-06	9.78115e-06
HORVU3Hr1G070270	130.459	1.04105	0.177003	5.88156	4.06428e-09	2.36669e-08
HORVU3Hr1G070490	25.1688	1.33505	0.444779	3.00159	0.00268571	0.00696913
HORVU3Hr1G070700	719.182	2.78607	0.111772	24.9263	3.8586e-137	4.48149e-135
HORVU3Hr1G070850	22.5691	2.34861	0.455243	5.15903	2.48234e-07	1.20597e-06
HORVU3Hr1G071120	33.9743	2.80833	0.461646	6.0833	1.17732e-09	7.22597e-09
HORVU3Hr1G071320	157.165	1.73896	0.165269	10.522	6.8413e-26	1.09804e-24
HORVU3Hr1G071370	22.3692	3.28026	0.490022	6.69411	2.16992e-11	1.53558e-10
HORVU3Hr1G071410	46.4454	1.29668	0.297911	4.35256	1.34554e-05	5.26802e-05
HORVU3Hr1G071470	5472.41	4.1222	0.0884753	46.5916	0	0
HORVU3Hr1G071520	221.162	1.09924	0.206678	5.31863	1.04554e-07	5.2999e-07
HORVU3Hr1G071830	155.141	1.87569	0.190455	9.84846	6.96049e-23	9.79566e-22
HORVU3Hr1G072140	162.267	1.06209	0.148773	7.13899	9.4019e-13	7.35247e-12
HORVU3Hr1G072860	65.6062	1.83322	0.29698	6.17287	6.70615e-10	4.21513e-09
HORVU3Hr1G072910	498.891	1.34212	0.0967516	13.8718	9.39218e-44	2.6865e-42
HORVU3Hr1G072970	18.3779	1.5839	0.433332	3.65517	0.000257014	0.000811102
HORVU3Hr1G073280	97.1971	2.45086	0.20837	11.7621	6.12007e-32	1.23559e-30
HORVU3Hr1G074290	621.368	-1.27432	0.136184	-9.35737	8.17424e-21	1.03095e-19
HORVU3Hr1G074310	44.5241	2.5074	0.407734	6.14959	7.76828e-10	4.85385e-09
HORVU3Hr1G074350	30.9961	-1.18033	0.320487	-3.68293	0.000230571	0.000734118
HORVU3Hr1G074390	18.3118	-1.25446	0.462719	-2.71107	0.0067067	0.0158646
HORVU3Hr1G074680	1653.21	1.1593	0.090309	12.837	1.0169e-37	2.44821e-36
HORVU3Hr1G074720	37.4742	5.381	0.595353	9.03833	1.59083e-19	1.88387e-18
HORVU3Hr1G074820	19.0412	1.44941	0.478847	3.02688	0.00247093	0.00646898
HORVU3Hr1G074960	447.998	2.2813	0.14758	15.4581	6.65791e-54	2.35737e-52
HORVU3Hr1G075040	89.3782	1.12255	0.24942	4.50063	6.77532e-06	2.77337e-05
HORVU3Hr1G075200	13.2522	1.34674	0.539258	2.49739	0.0125111	0.0276972
HORVU3Hr1G076400	38.8235	1.93567	0.36026	5.37297	7.74518e-08	4.00288e-07
HORVU3Hr1G076480	376.729	1.25708	0.114469	10.9818	4.67351e-28	8.1711e-27
HORVU3Hr1G076750	1284.23	1.47277	0.0835635	17.6246	1.5951e-69	7.85947e-68
HORVU3Hr1G076880	94.8457	1.21092	0.214777	5.63803	1.72004e-08	9.4658e-08
HORVU3Hr1G077070	14.9683	3.30557	0.707319	4.67337	2.96291e-06	1.27142e-05
HORVU3Hr1G077110	331.498	2.64211	0.121676	21.7143	1.50404e-104	1.24189e-102
HORVU3Hr1G077130	95.8661	3.25616	0.263526	12.3561	4.51285e-35	9.99923e-34
HORVU3Hr1G077490	16.9361	1.42105	0.491312	2.89236	0.00382361	0.00956718
HORVU3Hr1G077580	150.341	1.09259	0.177408	6.15863	7.3377e-10	4.59296e-09
HORVU3Hr1G077670	133.262	3.46805	0.249413	13.9048	5.92087e-44	1.69817e-42
HORVU3Hr1G077880	34.9365	2.16348	0.350977	6.16418	7.08492e-10	4.43868e-09
HORVU3Hr1G077890	462.525	1.86697	0.106836	17.4752	2.21353e-68	1.06582e-66
HORVU3Hr1G077950	139.863	2.39746	0.182872	13.11	2.88435e-39	7.35458e-38
HORVU3Hr1G078390	83.4082	1.72238	0.272806	6.31356	2.72689e-10	1.76813e-09
HORVU3Hr1G078760	427.28	1.36981	0.106993	12.8028	1.58202e-37	3.76161e-36
HORVU3Hr1G078810	3.43348	5.31573	1.44363	3.68221	0.000231225	0.000735869
HORVU3Hr1G078840	104.414	2.03388	0.214252	9.49296	2.24562e-21	2.90502e-20
HORVU3Hr1G079180	255.682	1.35569	0.118673	11.4237	3.18386e-30	6.03591e-29
HORVU3Hr1G079340	46.1654	2.63785	0.3675	7.1778	7.08397e-13	5.59779e-12
HORVU3Hr1G079540	10.6369	-1.31032	0.571643	-2.29221	0.0218938	0.0454697
HORVU3Hr1G079970	7.57248	2.74384	0.878529	3.12322	0.00178882	0.00482359
HORVU3Hr1G080770	288.266	1.20254	0.170019	7.07295	1.51671e-12	1.17179e-11
HORVU3Hr1G081000	9.15627	1.71677	0.684425	2.50834	0.0121298	0.0269526
HORVU3Hr1G081100	587.107	1.81365	0.101451	17.8771	1.77756e-71	9.1644e-70
HORVU3Hr1G081180	133.249	-1.16546	0.157687	-7.39098	1.45754e-13	1.20727e-12
HORVU3Hr1G081380	631.045	1.34399	0.117952	11.3943	4.4635e-30	8.36431e-29
HORVU3Hr1G081400	306.471	-1.06755	0.12984	-8.22203	2.00084e-16	2.00254e-15
HORVU3Hr1G081600	947.487	-1.03724	0.104412	-9.93405	2.95976e-23	4.20379e-22
HORVU3Hr1G082170	1260.58	1.05312	0.0801578	13.1381	1.9921e-39	5.09795e-38
HORVU3Hr1G082280	10773.4	-1.08225	0.0722154	-14.9864	9.00594e-51	2.9885e-49
HORVU3Hr1G082440	168.199	-1.33285	0.166426	-8.00868	1.15946e-15	1.10799e-14
HORVU3Hr1G082490	61.2815	-1.237	0.24309	-5.08864	3.60646e-07	1.72201e-06
HORVU3Hr1G082580	1216.69	1.07864	0.0884139	12.1998	3.11415e-34	6.76535e-33
HORVU3Hr1G082800	19.5576	1.26276	0.450401	2.80363	0.00505314	0.0122844
HORVU3Hr1G082870	22.4694	2.48487	0.416066	5.9723	2.33936e-09	1.39885e-08
HORVU3Hr1G083190	243.432	3.62797	0.198509	18.2761	1.28194e-74	6.96598e-73
HORVU3Hr1G083360	78.1098	-1.29016	0.223784	-5.76521	8.15556e-09	4.61435e-08
HORVU3Hr1G083500	48.2307	1.55271	0.353141	4.39686	1.09827e-05	4.36496e-05
HORVU3Hr1G083520	368.942	-1.2821	0.130762	-9.80483	1.07331e-22	1.49556e-21
HORVU3Hr1G083550	17.6308	-1.1178	0.453734	-2.46357	0.0137563	0.0301108
HORVU3Hr1G083650	281.722	2.94919	0.157409	18.7358	2.52728e-78	1.45167e-76
HORVU3Hr1G083680	349.591	3.21391	0.192128	16.7279	8.20416e-63	3.55368e-61
HORVU3Hr1G083740	23.3149	2.61665	0.490517	5.33446	9.58271e-08	4.8833e-07
HORVU3Hr1G083760	75.8986	1.95598	0.248196	7.88082	3.25238e-15	3.01795e-14
HORVU3Hr1G083820	35.6038	1.16159	0.343579	3.38084	0.000722645	0.002102
HORVU3Hr1G084220	2337.73	1.53414	0.265929	5.769	7.9741e-09	4.51652e-08
HORVU3Hr1G084250	14.6898	1.48416	0.513079	2.89265	0.00382001	0.00956044
HORVU3Hr1G084530	20.7111	1.20093	0.407307	2.94846	0.00319364	0.00815108
HORVU3Hr1G084990	11.0511	1.84269	0.615111	2.99571	0.0027381	0.00709463
HORVU3Hr1G085100	1153.54	-2.25577	0.0776213	-29.0612	1.10976e-185	1.95484e-183
HORVU3Hr1G085360	18.7409	1.17936	0.424085	2.78094	0.00542018	0.0130879
HORVU3Hr1G085640	392.593	1.36045	0.129956	10.4686	1.20463e-25	1.91455e-24
HORVU3Hr1G085890	750.067	2.05491	0.11583	17.7406	2.03597e-70	1.01501e-68
HORVU3Hr1G086040	432.363	1.54014	0.1061	14.5159	9.6043e-48	3.02557e-46
HORVU3Hr1G086100	15.4078	5.76405	1.57867	3.6512	0.000261013	0.000822618
HORVU3Hr1G086150	69.3304	3.91142	0.346824	11.2778	1.68876e-29	3.1095e-28
HORVU3Hr1G086160	61.2199	1.43456	0.340529	4.21274	2.52287e-05	9.46714e-05
HORVU3Hr1G086180	4.36256	3.75487	1.23602	3.03788	0.00238253	0.00626765
HORVU3Hr1G086220	368.06	1.84265	0.123665	14.9003	3.27862e-50	1.07949e-48
HORVU3Hr1G086230	144.644	2.03518	0.183561	11.0872	1.44703e-28	2.5747e-27
HORVU3Hr1G086240	198.436	2.32121	0.182517	12.7177	4.71311e-37	1.09962e-35
HORVU3Hr1G086400	37.3008	2.07592	0.315451	6.58082	4.67845e-11	3.22443e-10
HORVU3Hr1G086790	9.94838	3.19719	0.814115	3.9272	8.594e-05	0.000297227
HORVU3Hr1G086840	88.0388	3.47193	0.295823	11.7365	8.28024e-32	1.66218e-30
HORVU3Hr1G086980	5.67633	2.66612	0.856503	3.1128	0.00185319	0.00498318
HORVU3Hr1G087020	160.789	3.62073	0.22341	16.2066	4.52589e-59	1.80166e-57
HORVU3Hr1G087050	753.575	1.55896	0.0835014	18.6698	8.71431e-78	4.95169e-76
HORVU3Hr1G087180	295.626	-1.00317	0.152532	-6.57676	4.80825e-11	3.30741e-10
HORVU3Hr1G087210	4433.28	-1.75448	0.0722705	-24.2766	3.46658e-130	3.77714e-128
HORVU3Hr1G087220	734.68	-1.09827	0.0800569	-13.7186	7.8584e-43	2.19143e-41
HORVU3Hr1G087570	7.9273	1.63481	0.705413	2.31752	0.0204755	0.0428483
HORVU3Hr1G087600	155.505	-1.32746	0.186865	-7.10383	1.21346e-12	9.42672e-12
HORVU3Hr1G087640	15.0037	1.41186	0.598426	2.35928	0.0183102	0.0387855
HORVU3Hr1G087690	20.7115	1.69372	0.46155	3.66963	0.000242899	0.000770121
HORVU3Hr1G087740	799.149	2.05795	0.113561	18.1219	2.14003e-73	1.13658e-71
HORVU3Hr1G088200	3367.08	1.3342	0.0596462	22.3686	7.96111e-111	7.04108e-109
HORVU3Hr1G088270	19.3796	1.91966	0.491774	3.90355	9.47929e-05	0.000325334
HORVU3Hr1G088310	62.6923	-1.51871	0.24426	-6.21757	5.04899e-10	3.20497e-09
HORVU3Hr1G088850	206.108	1.06047	0.152388	6.95903	3.42633e-12	2.58756e-11
HORVU3Hr1G089190	7685.57	-1.05188	0.0503828	-20.8777	8.53511e-97	6.53678e-95
HORVU3Hr1G089290	2038.01	1.37422	0.0784967	17.5067	1.27306e-68	6.172e-67
ENSRNA049488473	15.4594	-1.61513	0.507431	-3.18295	0.00145781	0.00400354
HORVU3Hr1G089690	244.412	1.04579	0.190333	5.49452	3.91784e-08	2.0787e-07
HORVU3Hr1G089830	19943.2	1.77326	0.0595582	29.7735	8.60354e-195	1.65329e-192
HORVU3Hr1G089970	425.582	1.10431	0.109892	10.0491	9.27141e-24	1.35814e-22
HORVU3Hr1G090170	755.41	1.71146	0.0875352	19.5517	3.98918e-85	2.49477e-83
HORVU3Hr1G090220	372.772	4.14999	0.166437	24.9343	3.15831e-137	3.68841e-135
HORVU3Hr1G090560	2877.8	1.04166	0.0668912	15.5725	1.1194e-54	4.00372e-53
HORVU3Hr1G090730	364.113	1.00855	0.105484	9.56118	1.16427e-21	1.53144e-20
HORVU3Hr1G090840	23.195	-1.96447	0.413533	-4.75045	2.02967e-06	8.87531e-06
HORVU3Hr1G090890	49.6215	1.03162	0.273658	3.76975	0.000163413	0.000537791
HORVU3Hr1G091020	44.5674	3.05324	0.404241	7.553	4.25344e-14	3.68028e-13
HORVU3Hr1G091070	3.88162	4.89804	1.40585	3.48404	0.000493903	0.00147982
HORVU3Hr1G091120	20.7585	2.97255	0.533782	5.56885	2.56428e-08	1.38064e-07
HORVU3Hr1G091360	138.765	2.82328	0.195197	14.4638	2.05271e-47	6.40918e-46
HORVU3Hr1G092250	1226.76	1.45286	0.0818525	17.7498	1.73057e-70	8.66842e-69
HORVU3Hr1G092460	32.8737	1.24112	0.38632	3.21268	0.00131504	0.00364459
HORVU3Hr1G092470	449.638	1.04493	0.0999512	10.4544	1.39873e-25	2.21637e-24
HORVU3Hr1G092520	2503.24	1.79598	0.111854	16.0565	5.14537e-58	1.99199e-56
HORVU3Hr1G092590	895.505	1.19282	0.0764734	15.5978	7.53286e-55	2.7126e-53
HORVU3Hr1G092660	1286.24	1.02978	0.076711	13.4241	4.36794e-41	1.17318e-39
HORVU3Hr1G093100	7099.16	5.14497	0.0875927	58.7374	0	0
HORVU3Hr1G093260	819.219	-1.4774	0.0967626	-15.2683	1.24368e-52	4.28157e-51
HORVU3Hr1G093280	2.06125	4.83497	1.69026	2.86049	0.00422985	0.0104647
HORVU3Hr1G093550	293.511	1.77638	0.165676	10.722	8.02535e-27	1.34315e-25
HORVU3Hr1G093730	14.165	3.8532	0.772809	4.98597	6.16512e-07	2.87087e-06
HORVU3Hr1G093780	4.88117	4.85093	1.38966	3.49072	0.000481718	0.00144618
HORVU3Hr1G093930	495.112	1.21259	0.0950045	12.7635	2.6218e-37	6.19214e-36
HORVU3Hr1G094250	38.3069	1.75623	0.371173	4.73157	2.22788e-06	9.69192e-06
HORVU3Hr1G094320	41.2144	1.12874	0.305137	3.69913	0.000216338	0.000693082
HORVU3Hr1G094340	522.312	3.3174	0.133248	24.8965	8.12368e-137	9.33252e-135
HORVU3Hr1G094370	139.584	2.76965	0.235909	11.7403	7.91815e-32	1.59101e-30
HORVU3Hr1G094450	282.141	1.35784	0.132042	10.2834	8.37193e-25	1.29266e-23
HORVU3Hr1G095360	34.983	-1.53667	0.337759	-4.54962	5.37441e-06	2.23455e-05
HORVU3Hr1G095710	96.0413	1.55855	0.201511	7.73431	1.03964e-14	9.3237e-14
HORVU3Hr1G095730	283.568	2.5493	0.151032	16.8792	6.40115e-64	2.82479e-62
HORVU3Hr1G095790	21.1276	1.88867	0.457177	4.13114	3.60961e-05	0.000132121
HORVU3Hr1G095820	575.466	1.68506	0.0839012	20.0839	1.02148e-89	7.05621e-88
HORVU3Hr1G095830	39.0055	1.52986	0.322725	4.74044	2.13254e-06	9.29848e-06
HORVU3Hr1G096190	404.089	1.73775	0.108409	16.0296	7.93309e-58	3.06003e-56
HORVU3Hr1G096280	776.568	3.46238	0.11208	30.8921	1.52405e-209	3.39109e-207
HORVU3Hr1G096360	513.927	3.49886	0.122931	28.462	3.46529e-178	5.90719e-176
HORVU3Hr1G096620	1509.91	1.7549	0.0882995	19.8744	6.77293e-88	4.50208e-86
HORVU3Hr1G096720	10.4165	2.0717	0.752735	2.75223	0.00591917	0.0141446
HORVU3Hr1G096740	42.1151	1.02231	0.316293	3.23215	0.00122863	0.00342442
HORVU3Hr1G096760	474.904	2.91924	0.112215	26.0148	3.37133e-149	4.48196e-147
HORVU3Hr1G096890	24.6429	1.58225	0.42379	3.73357	0.000188784	0.000612135
HORVU3Hr1G096910	17376.7	-1.22558	0.0612342	-20.0146	4.1075e-89	2.77394e-87
HORVU3Hr1G097000	11.6256	-1.5305	0.624319	-2.45148	0.0142271	0.0310097
HORVU3Hr1G097200	1095.69	-1.30898	0.0740913	-17.6671	7.51041e-70	3.73541e-68
HORVU3Hr1G097300	46.9319	3.45346	0.385025	8.96945	2.97994e-19	3.48974e-18
HORVU3Hr1G097390	32.3616	-1.12361	0.385183	-2.91709	0.00353317	0.00892604
HORVU3Hr1G097950	2592.88	1.5679	0.0610899	25.6655	2.83641e-145	3.54769e-143
HORVU3Hr1G098150	8.63684	1.98182	0.718351	2.75885	0.00580047	0.0138951
HORVU3Hr1G098280	28.8181	2.62345	0.46355	5.65947	1.51845e-08	8.40674e-08
HORVU3Hr1G098400	2005.15	1.60832	0.0782692	20.5485	7.93181e-94	5.7616e-92
HORVU3Hr1G098610	18.6838	3.19013	0.533997	5.97406	2.31424e-09	1.3854e-08
HORVU3Hr1G099220	949.023	1.88085	0.0865121	21.7409	8.42626e-105	7.04009e-103
HORVU3Hr1G099530	846.988	3.87869	0.115991	33.4395	3.65843e-245	1.08918e-242
HORVU3Hr1G099590	62.5333	5.55097	0.524154	10.5903	3.30393e-26	5.39711e-25
HORVU3Hr1G099630	86.4929	1.79882	0.255459	7.0415	1.90175e-12	1.46019e-11
HORVU3Hr1G099760	238.644	2.25349	0.22207	10.1476	3.39442e-24	5.0636e-23
HORVU3Hr1G100190	776.954	2.81676	0.135528	20.7835	6.10038e-96	4.57269e-94
HORVU3Hr1G101230	117.952	-1.47331	0.25332	-5.816	6.02718e-09	3.45171e-08
HORVU3Hr1G102720	621.804	-1.09191	0.377184	-2.89491	0.00379272	0.00950112
HORVU3Hr1G102860	22.4126	1.594	0.482823	3.30142	0.000961981	0.00273164
HORVU3Hr1G103960	12.726	2.22923	0.639551	3.48562	0.00049099	0.00147222
HORVU3Hr1G104600	111.741	-1.72408	0.178423	-9.66289	4.3348e-22	5.85864e-21
HORVU3Hr1G104790	27.8575	1.46752	0.370005	3.96623	7.30176e-05	0.000255326
HORVU3Hr1G104940	31589.9	4.26596	0.0936544	45.5501	0	0
HORVU3Hr1G105190	617.001	1.43786	0.142219	10.1102	4.97697e-24	7.38268e-23
HORVU3Hr1G105290	248.21	3.65042	0.190457	19.1666	7.03808e-82	4.21447e-80
HORVU3Hr1G105300	3481.21	1.78933	0.0811938	22.0378	1.25137e-107	1.07526e-105
HORVU3Hr1G105400	183.2	4.30174	0.249917	17.2127	2.1322e-66	9.86224e-65
HORVU3Hr1G105420	435.671	4.71176	0.197158	23.8984	3.18069e-126	3.27968e-124
HORVU3Hr1G105560	130.121	3.51134	0.239869	14.6386	1.59333e-48	5.08757e-47
HORVU3Hr1G105600	491.48	4.09365	0.138957	29.4599	9.41023e-191	1.71477e-188
HORVU3Hr1G105610	6.89222	2.53666	0.749986	3.38227	0.000718899	0.00209168
HORVU3Hr1G105630	358.287	4.22847	0.219845	19.2339	1.92682e-82	1.16369e-80
HORVU3Hr1G105720	54.8211	1.2956	0.285441	4.53893	5.65396e-06	2.34409e-05
HORVU3Hr1G105870	126.174	1.5127	0.172102	8.78954	1.50175e-18	1.69031e-17
HORVU3Hr1G105920	24.2627	1.81371	0.399816	4.53636	5.72339e-06	2.36939e-05
HORVU3Hr1G106070	62.089	1.33704	0.249146	5.3665	8.02771e-08	4.13676e-07
HORVU3Hr1G106950	1036.53	1.38301	0.0867144	15.9491	2.89188e-57	1.08964e-55
HORVU3Hr1G107350	164.912	-1.1298	0.148746	-7.59547	3.06686e-14	2.6744e-13
HORVU3Hr1G107490	4.47887	-2.48486	1.04412	-2.37986	0.0173191	0.0369529
HORVU3Hr1G107830	7.60028	3.09142	0.990014	3.1226	0.0017926	0.00483192
HORVU3Hr1G107860	27.5147	3.96657	0.577174	6.87239	6.31333e-12	4.66449e-11
HORVU3Hr1G107910	5.87632	5.7109	1.40128	4.07548	4.59198e-05	0.000165415
HORVU3Hr1G108100	544.976	4.76937	0.163271	29.2113	1.39271e-187	2.49483e-185
HORVU3Hr1G108140	15.1276	1.78948	0.617454	2.89816	0.00375362	0.00941768
HORVU3Hr1G108170	72.7461	1.32978	0.305756	4.34914	1.36673e-05	5.34503e-05
HORVU3Hr1G108250	20.0103	4.77586	0.811317	5.88655	3.94335e-09	2.30007e-08
HORVU3Hr1G108290	20.9898	3.52902	0.625411	5.64272	1.67381e-08	9.22659e-08
HORVU3Hr1G108300	70.8181	2.29225	0.577909	3.96646	7.29495e-05	0.00025513
HORVU3Hr1G108360	175.972	3.17742	0.203608	15.6056	6.66922e-55	2.40981e-53
HORVU3Hr1G108370	4.98359	5.19003	1.33672	3.88266	0.000103321	0.000352031
HORVU3Hr1G108630	121.255	3.0719	0.225116	13.6458	2.1378e-42	5.92252e-41
HORVU3Hr1G108900	279.537	1.71222	0.156764	10.9223	9.0213e-28	1.56819e-26
HORVU3Hr1G108910	13.99	1.93673	0.496599	3.89998	9.62019e-05	0.000329688
HORVU3Hr1G108920	102.259	1.51208	0.20053	7.54041	4.68488e-14	4.03541e-13
HORVU3Hr1G108970	712.978	1.3733	0.0845634	16.2398	2.63589e-59	1.05326e-57
HORVU3Hr1G109010	196.896	1.32987	0.138092	9.63031	5.95485e-22	7.99197e-21
HORVU3Hr1G109040	6.07354	5.40945	1.34985	4.00744	6.13795e-05	0.000217036
HORVU3Hr1G109170	33.0957	3.62526	0.491684	7.37316	1.66636e-13	1.37699e-12
HORVU3Hr1G109180	6.75346	3.3482	0.907236	3.69055	0.000223772	0.000714625
HORVU3Hr1G109200	13.0998	1.25668	0.509713	2.46545	0.013684	0.0299618
HORVU3Hr1G109220	64.3872	2.82718	0.355135	7.96086	1.70843e-15	1.61507e-14
HORVU3Hr1G109230	65.0046	1.79993	0.260303	6.91475	4.68679e-12	3.50849e-11
HORVU3Hr1G109300	2200.85	-1.08488	0.0905814	-11.9769	4.69578e-33	9.80824e-32
HORVU3Hr1G109350	1238.52	5.07244	0.116506	43.5379	0	0
HORVU3Hr1G109370	46.6621	1.14742	0.364582	3.14723	0.00164827	0.00447888
HORVU3Hr1G109430	97.6253	3.78612	0.269526	14.0473	7.99791e-45	2.35132e-43
HORVU3Hr1G109460	136.445	2.89877	0.226057	12.8232	1.21609e-37	2.92109e-36
HORVU3Hr1G109530	24.2007	-1.58565	0.507285	-3.12577	0.00177342	0.00478695
HORVU3Hr1G109590	38.3	5.65122	0.692881	8.15613	3.45944e-16	3.42188e-15
HORVU3Hr1G109930	271.134	-1.48861	0.198205	-7.51047	5.89144e-14	5.02962e-13
HORVU3Hr1G110440	3.44903	4.881	1.53191	3.18622	0.00144145	0.00396529
HORVU3Hr1G110580	44.5219	1.0629	0.301732	3.52268	0.000427199	0.0012952
HORVU3Hr1G110830	254.174	1.04951	0.141094	7.43836	1.01945e-13	8.54109e-13
HORVU3Hr1G111080	302.611	2.73864	0.14623	18.7283	2.91141e-78	1.66779e-76
HORVU3Hr1G111600	8017.78	4.51339	0.0883212	51.102	0	0
HORVU3Hr1G112040	3.17649	4.40169	1.51832	2.89906	0.00374284	0.00939755
HORVU3Hr1G112140	7.47933	1.71689	0.712885	2.40837	0.0160241	0.0344962
HORVU3Hr1G112610	8.90803	2.68146	0.675368	3.97036	7.17635e-05	0.000251398
HORVU3Hr1G113100	104.843	1.15335	0.193826	5.95045	2.67406e-09	1.59089e-08
HORVU3Hr1G113120	7273.47	3.89289	0.133734	29.1092	2.74971e-186	4.88432e-184
HORVU3Hr1G113620	22691.8	3.93924	0.0999867	39.3976	0	0
HORVU3Hr1G114280	5.27569	-1.95877	0.80794	-2.42439	0.0153339	0.0331454
HORVU3Hr1G116200	381.341	1.09232	0.149964	7.2839	3.24294e-13	2.62742e-12
HORVU3Hr1G116450	325.28	1.0131	0.160948	6.29461	3.0818e-10	1.9885e-09
HORVU3Hr1G116580	82.7233	1.35609	0.220339	6.15454	7.52956e-10	4.71026e-09
HORVU3Hr1G116650	896.929	1.1014	0.138642	7.94421	1.95431e-15	1.83601e-14
HORVU3Hr1G116730	40.8025	1.86184	0.349915	5.32084	1.03289e-07	5.24119e-07
HORVU3Hr1G116770	427.222	2.26695	0.310453	7.30209	2.83335e-13	2.30352e-12
HORVU3Hr1G117440	35.6157	-2.77872	0.472228	-5.88428	3.99781e-09	2.32991e-08
HORVU3Hr1G117480	16.9049	2.16966	0.562252	3.85888	0.000113907	0.000384936
HORVU3Hr1G117570	108.394	-1.10167	0.196029	-5.61993	1.91034e-08	1.04483e-07
HORVU3Hr1G117760	647.85	1.01788	0.0882705	11.5314	9.16536e-31	1.7856e-29
HORVU3Hr1G117910	147.688	1.66364	0.181363	9.173	4.60036e-20	5.59508e-19
HORVU5Hr1G000240	11.2487	1.56707	0.633347	2.47427	0.0133508	0.0293144
HORVU5Hr1G000630	685.934	2.62028	0.145527	18.0055	1.76397e-72	9.2523e-71
HORVU5Hr1G000640	6093.94	6.59506	0.0878718	75.0532	0	0
HORVU5Hr1G000740	225.584	1.50655	0.153608	9.80777	1.04249e-22	1.45357e-21
HORVU5Hr1G000910	105.297	3.67506	0.270647	13.5788	5.35107e-42	1.45762e-40
HORVU5Hr1G000940	436.374	3.21547	0.138685	23.1855	6.3847e-119	6.24814e-117
HORVU5Hr1G001420	40.8653	1.14421	0.286905	3.98812	6.65995e-05	0.00023424
HORVU5Hr1G001920	380.545	1.82573	0.159237	11.4655	1.96559e-30	3.77029e-29
HORVU5Hr1G002000	177.834	1.12066	0.137583	8.14536	3.7817e-16	3.73366e-15
HORVU5Hr1G002340	454.139	2.06239	0.120412	17.1277	9.21874e-66	4.22702e-64
ENSRNA049480871	3.92731	-2.09987	0.913391	-2.29898	0.0215062	0.0447615
HORVU5Hr1G004700	2925.3	-2.2721	0.0516496	-43.9906	0	0
HORVU5Hr1G004990	3.67038	4.23259	1.47449	2.87054	0.00409768	0.0101854
HORVU5Hr1G005030	23.3262	4.51688	0.804762	5.61269	1.99206e-08	1.08751e-07
HORVU5Hr1G005180	9228.6	1.71857	0.122617	14.0157	1.24985e-44	3.64907e-43
HORVU5Hr1G005210	193.151	4.11984	0.217454	18.9458	4.78254e-80	2.79263e-78
HORVU5Hr1G005290	29.7343	2.02284	0.393257	5.14381	2.69226e-07	1.30376e-06
HORVU5Hr1G005480	13.6949	-1.19866	0.470976	-2.54506	0.010926	0.0245643
HORVU5Hr1G006330	20.4753	1.74962	0.4628	3.7805	0.000156513	0.000516692
HORVU5Hr1G006670	10.8553	1.32546	0.548146	2.41808	0.0156028	0.0336749
HORVU5Hr1G007680	322.628	1.05771	0.126652	8.35127	6.75317e-17	6.92282e-16
HORVU5Hr1G007760	18.2839	1.98615	0.623732	3.18431	0.00145102	0.00398903
HORVU5Hr1G007840	39.9182	1.10098	0.280512	3.9249	8.67671e-05	0.000299981
HORVU5Hr1G007890	208.576	-1.20979	0.185546	-6.52015	7.02385e-11	4.78011e-10
HORVU5Hr1G008270	93.1001	3.95967	0.590787	6.70236	2.05081e-11	1.4547e-10
HORVU5Hr1G009220	8.84174	4.83611	1.13798	4.24971	2.14047e-05	8.11865e-05
HORVU5Hr1G009780	11.534	1.90719	0.648602	2.94046	0.00327727	0.00834135
HORVU5Hr1G009840	221.596	4.12597	0.205869	20.0418	2.3815e-89	1.62388e-87
HORVU5Hr1G010120	2447.38	3.73905	0.123132	30.3662	1.53379e-202	3.21003e-200
HORVU5Hr1G010130	7085.7	3.9074	0.113324	34.48	1.60074e-260	5.45748e-258
HORVU5Hr1G010150	14.9661	2.78822	0.585139	4.76505	1.88808e-06	8.30253e-06
HORVU5Hr1G010420	84.8176	7.29466	0.755007	9.66171	4.3848e-22	5.92242e-21
HORVU5Hr1G010560	15.5861	1.15849	0.494279	2.34379	0.0190888	0.0402212
HORVU5Hr1G010870	1685.97	-1.00004	0.0775649	-12.8929	4.93591e-38	1.2048e-36
HORVU5Hr1G010880	177.339	2.07523	0.182278	11.385	4.96665e-30	9.26612e-29
HORVU5Hr1G010950	1698.83	-1.04263	0.0621569	-16.7741	3.77674e-63	1.64265e-61
HORVU5Hr1G011640	275.917	1.41066	0.136557	10.3302	5.14795e-25	7.98953e-24
HORVU5Hr1G011680	14.5548	4.21973	0.808576	5.21872	1.80168e-07	8.90641e-07
HORVU5Hr1G012010	116.742	2.81859	0.212836	13.243	4.95365e-40	1.28479e-38
HORVU5Hr1G012040	838.095	2.11316	0.110669	19.0943	2.81494e-81	1.68085e-79
HORVU5Hr1G012120	492.426	2.03692	0.183249	11.1156	1.05357e-28	1.88892e-27
HORVU5Hr1G012190	5.03391	3.13124	1.25265	2.49969	0.0124301	0.0275301
HORVU5Hr1G012740	248.701	-1.22994	0.219219	-5.61057	2.01661e-08	1.10005e-07
HORVU5Hr1G012890	695.869	1.12335	0.0864865	12.9887	1.4173e-38	3.51629e-37
HORVU5Hr1G013260	132.921	-1.10083	0.194273	-5.66642	1.45813e-08	8.09399e-08
HORVU5Hr1G013510	540.067	1.1505	0.15795	7.28393	3.24232e-13	2.62742e-12
HORVU5Hr1G013640	25.6968	1.44063	0.408372	3.52773	0.000419132	0.00127238
HORVU5Hr1G013990	26.7305	1.01821	0.361115	2.81964	0.00480782	0.0117529
HORVU5Hr1G014060	216.246	2.64569	0.164737	16.0601	4.8586e-58	1.88443e-56
HORVU5Hr1G014070	41.9426	3.09204	0.374581	8.25466	1.52329e-16	1.5355e-15
HORVU5Hr1G014130	12.372	2.07034	0.559065	3.70322	0.000212879	0.000683138
HORVU5Hr1G014200	6.46657	1.92536	0.719663	2.67536	0.00746492	0.0174608
HORVU5Hr1G014510	5.06545	3.45586	1.20475	2.86852	0.00412393	0.010235
HORVU5Hr1G014650	12.7205	-1.13964	0.491379	-2.31927	0.0203806	0.0426789
HORVU5Hr1G014800	148.214	-1.01153	0.155622	-6.49993	8.03589e-11	5.42865e-10
ENSRNA049489507	3.08437	-3.92291	1.47761	-2.65491	0.00793296	0.0184576
HORVU5Hr1G015980	5.81895	-3.2865	1.39419	-2.35729	0.0184089	0.0389674
HORVU5Hr1G016400	812.277	1.37781	0.15646	8.80613	1.2954e-18	1.4635e-17
HORVU5Hr1G016600	181.224	-1.08348	0.189917	-5.705	1.16341e-08	6.50757e-08
HORVU5Hr1G016710	12.3478	1.93446	0.631334	3.06409	0.00218332	0.0057848
HORVU5Hr1G017720	26.2403	2.49809	0.470393	5.31065	1.09232e-07	5.5291e-07
HORVU5Hr1G018220	2484.74	-1.46031	0.0686773	-21.2633	2.48062e-100	1.94927e-98
HORVU5Hr1G018240	97.3468	1.10694	0.209275	5.28939	1.22726e-07	6.18106e-07
HORVU5Hr1G018340	134.26	-1.03326	0.208553	-4.95445	7.25365e-07	3.3463e-06
HORVU5Hr1G018720	62.2758	1.17266	0.230398	5.08971	3.58603e-07	1.71342e-06
HORVU5Hr1G018750	3.28305	4.03545	1.43086	2.82029	0.00479804	0.0117318
HORVU5Hr1G018930	356.8	1.26456	0.126683	9.98213	1.82515e-23	2.62449e-22
HORVU5Hr1G019720	2.61095	4.04059	1.55442	2.59942	0.0093381	0.0213048
HORVU5Hr1G019820	384.789	4.26756	0.173599	24.5828	1.92977e-133	2.16976e-131
HORVU5Hr1G020710	23.0327	-1.4636	0.447954	-3.2673	0.00108578	0.00306056
HORVU5Hr1G020930	9.02497	1.95053	0.828272	2.35494	0.0185258	0.0391783
HORVU5Hr1G021390	5.04781	2.68487	1.06878	2.51208	0.0120023	0.026689
HORVU5Hr1G021560	8.4822	1.87497	0.779801	2.40442	0.0161983	0.0348143
HORVU5Hr1G021690	16.5799	-1.11609	0.400661	-2.78563	0.00534246	0.0129195
HORVU5Hr1G022040	8.63459	2.24097	0.737805	3.03734	0.00238674	0.00627655
HORVU5Hr1G022550	35.7836	1.4768	0.347556	4.24909	2.14644e-05	8.13537e-05
HORVU5Hr1G022570	1062.58	-1.03538	0.0743102	-13.9332	3.97872e-44	1.14269e-42
HORVU5Hr1G023160	1251.1	-1.17534	0.0662444	-17.7425	1.96856e-70	9.83721e-69
HORVU5Hr1G023520	54.5781	1.60227	0.316133	5.06834	4.0131e-07	1.9067e-06
HORVU5Hr1G023530	358.557	2.16423	0.118706	18.2319	2.88358e-74	1.5629e-72
HORVU5Hr1G023660	14.8923	5.0898	0.903253	5.63497	1.7509e-08	9.62562e-08
HORVU5Hr1G023720	908.121	4.27649	0.125059	34.1958	2.78711e-256	9.3514e-254
HORVU5Hr1G023730	4608.49	4.50952	0.121144	37.2245	2.73677e-303	1.37738e-300
HORVU5Hr1G023990	304.972	1.65182	0.142596	11.5839	4.97384e-31	9.75297e-30
HORVU5Hr1G024160	933.78	1.13488	0.0673408	16.8528	1.0005e-63	4.37859e-62
HORVU5Hr1G024390	94.9708	1.23701	0.222832	5.5513	2.83555e-08	1.51943e-07
HORVU5Hr1G024400	1491.16	3.15364	0.223431	14.1146	3.0863e-45	9.14983e-44
HORVU5Hr1G025680	175.265	-1.25366	0.135862	-9.22743	2.77211e-20	3.40481e-19
HORVU5Hr1G025850	6.66183	-2.94948	0.917029	-3.21634	0.00129836	0.0036031
HORVU5Hr1G026120	859.299	1.29829	0.101439	12.7987	1.66645e-37	3.9579e-36
HORVU5Hr1G026270	4.36585	3.25848	1.13763	2.86427	0.0041797	0.0103564
HORVU5Hr1G027110	15.3529	1.88489	0.678797	2.7768	0.00548963	0.013242
HORVU5Hr1G027180	38.3101	-1.01217	0.288099	-3.51328	0.000442614	0.00133791
HORVU5Hr1G028460	415.153	1.05359	0.108915	9.67351	3.90742e-22	5.29795e-21
HORVU5Hr1G028810	67.213	1.11297	0.256104	4.34576	1.38791e-05	5.41786e-05
HORVU5Hr1G033540	1537.75	-1.20597	0.234694	-5.13849	2.76957e-07	1.33905e-06
HORVU5Hr1G034460	49.7412	-1.20697	0.325962	-3.70281	0.000213227	0.000684048
HORVU5Hr1G034830	45.9933	2.57444	0.384656	6.69283	2.18891e-11	1.5485e-10
HORVU5Hr1G035300	76.494	-1.03194	0.213621	-4.83069	1.36058e-06	6.09191e-06
HORVU5Hr1G036790	643.402	1.14745	0.0909309	12.619	1.65992e-36	3.82633e-35
HORVU5Hr1G037660	2462.43	1.38167	0.0774271	17.8448	3.1735e-71	1.6286e-69
HORVU5Hr1G040140	7.27833	-2.12043	0.814107	-2.60462	0.00919775	0.0210141
HORVU5Hr1G040210	210.25	1.04094	0.145444	7.15701	8.24575e-13	6.4771e-12
HORVU5Hr1G040920	42.1462	1.44971	0.333466	4.34741	1.37755e-05	5.38239e-05
HORVU5Hr1G041450	19.7555	1.0624	0.470995	2.25565	0.0240928	0.0494922
HORVU5Hr1G041590	416.494	6.86689	0.286733	23.9487	9.53302e-127	9.92655e-125
HORVU5Hr1G041660	548.355	6.29212	0.221866	28.3601	6.2872e-177	1.05475e-174
HORVU5Hr1G041680	7.3065	1.89288	0.691334	2.73801	0.00618115	0.014717
HORVU5Hr1G041870	253.984	1.4844	0.141392	10.4985	8.77846e-26	1.40362e-24
HORVU5Hr1G042030	31.0265	3.31633	0.517728	6.40554	1.49839e-10	9.91016e-10
HORVU5Hr1G042740	749.477	2.01027	0.0940782	21.3681	2.64924e-101	2.09737e-99
HORVU5Hr1G043010	38.9132	2.72889	0.404259	6.75035	1.47485e-11	1.06002e-10
HORVU5Hr1G043200	131.88	-1.53915	0.20291	-7.58537	3.31539e-14	2.88516e-13
HORVU5Hr1G043460	198.335	1.9838	0.192639	10.298	7.19423e-25	1.11326e-23
HORVU5Hr1G044350	104.04	2.04489	0.210062	9.73469	2.14468e-22	2.94187e-21
HORVU5Hr1G044590	19.741	1.40373	0.454658	3.08744	0.00201886	0.00538211
HORVU5Hr1G044610	86.7842	2.05155	0.307985	6.66119	2.71619e-11	1.90494e-10
HORVU5Hr1G044830	24.747	-1.01676	0.378647	-2.68523	0.0072479	0.0170097
HORVU5Hr1G044960	41.9017	1.38009	0.303407	4.54864	5.39937e-06	2.24404e-05
HORVU5Hr1G045650	2.19371	3.92167	1.5988	2.45288	0.0141717	0.0309164
HORVU5Hr1G045850	2612.46	2.32779	0.074072	31.4261	8.91216e-217	2.07017e-214
HORVU5Hr1G046020	20.814	1.21484	0.468311	2.59408	0.00948445	0.0216084
HORVU5Hr1G046370	28.5397	1.01305	0.363815	2.78453	0.00536059	0.0129588
HORVU5Hr1G046900	43.1876	1.2269	0.310694	3.9489	7.85121e-05	0.000273472
HORVU5Hr1G047060	210.118	1.70948	0.141519	12.0795	1.35597e-33	2.88645e-32
HORVU5Hr1G047230	9.76113	1.55728	0.652908	2.38514	0.0170726	0.0364784
HORVU5Hr1G047520	34.3816	4.58286	0.584168	7.8451	4.32596e-15	3.9792e-14
HORVU5Hr1G047840	60.476	2.35118	0.283779	8.28526	1.17851e-16	1.19594e-15
HORVU5Hr1G047920	33.3325	3.52321	0.4702	7.49299	6.73215e-14	5.70815e-13
HORVU5Hr1G048180	74.5762	-1.06949	0.212674	-5.02878	4.93621e-07	2.3218e-06
HORVU5Hr1G048300	4954.83	-1.04336	0.0678777	-15.3712	2.55374e-53	8.93723e-52
HORVU5Hr1G048810	329.573	1.51016	0.14801	10.2031	1.92081e-24	2.90638e-23
HORVU5Hr1G048870	3.07099	3.9974	1.44664	2.76322	0.00572335	0.0137399
HORVU5Hr1G049260	3.09069	5.58115	1.42824	3.90771	9.31755e-05	0.000320147
ENSRNA049473916	62.6083	-1.07102	0.222602	-4.81138	1.49894e-06	6.67748e-06
HORVU5Hr1G050200	9.1017	1.70278	0.721264	2.36083	0.0182341	0.0386438
HORVU5Hr1G050240	474.804	1.58951	0.100308	15.8462	1.49273e-56	5.54539e-55
HORVU5Hr1G050940	192.639	1.2372	0.139076	8.89589	5.79516e-19	6.65461e-18
HORVU5Hr1G050990	4765.87	-1.18957	0.10796	-11.0187	3.10539e-28	5.45196e-27
HORVU5Hr1G051560	76.7569	2.63738	0.282629	9.33159	1.04295e-20	1.30836e-19
HORVU5Hr1G051970	620.807	2.78386	0.192924	14.4298	3.36077e-47	1.04624e-45
HORVU5Hr1G052150	1781.88	2.23929	0.15046	14.883	4.25203e-50	1.38703e-48
HORVU5Hr1G052190	195.137	-1.09653	0.138397	-7.92308	2.31706e-15	2.16143e-14
HORVU5Hr1G052760	217.198	1.42639	0.139506	10.2246	1.53939e-24	2.34943e-23
HORVU5Hr1G053010	33.0272	3.3952	0.445783	7.61626	2.61123e-14	2.29125e-13
HORVU5Hr1G053410	261.254	2.34623	0.16189	14.4927	1.34733e-47	4.23177e-46
HORVU5Hr1G053950	31628.3	-1.03706	0.0455643	-22.7603	1.13579e-114	1.06232e-112
HORVU5Hr1G054820	20.9782	4.35529	0.722913	6.02464	1.69486e-09	1.02624e-08
HORVU5Hr1G055850	2216.15	1.91043	0.0942525	20.2693	2.4023e-91	1.68145e-89
HORVU5Hr1G055950	25970.8	4.88478	0.128673	37.9629	0	0
HORVU5Hr1G056040	18877.9	4.77274	0.099693	47.8744	0	0
HORVU5Hr1G056130	737.843	1.59744	0.0969858	16.4708	5.94344e-61	2.45856e-59
HORVU5Hr1G056420	43.7219	2.48722	0.302212	8.23005	1.87132e-16	1.87558e-15
HORVU5Hr1G056600	9.49234	1.689	0.653645	2.58398	0.00976681	0.0221895
HORVU5Hr1G056670	1163.34	1.11315	0.125825	8.84682	9.00455e-19	1.02387e-17
HORVU5Hr1G057320	24.9784	1.97277	0.383751	5.14076	2.73633e-07	1.32419e-06
HORVU5Hr1G057590	14.7976	1.55162	0.509499	3.04538	0.00232385	0.00612718
HORVU5Hr1G057670	192.015	1.43356	0.169835	8.4409	3.14895e-17	3.29355e-16
HORVU5Hr1G057800	154.934	4.17696	0.260291	16.0473	5.9726e-58	2.30802e-56
HORVU5Hr1G057980	71.1948	-1.67786	0.208567	-8.04474	8.64294e-16	8.327e-15
HORVU5Hr1G057990	14.0149	-1.34307	0.49722	-2.70116	0.00690977	0.0162921
HORVU5Hr1G058020	276.993	3.22245	0.163666	19.6891	2.67314e-86	1.7071e-84
HORVU5Hr1G058070	397.941	1.45724	0.111302	13.0927	3.62725e-39	9.19338e-38
HORVU5Hr1G058170	182.701	1.10233	0.161006	6.84655	7.56506e-12	5.5621e-11
HORVU5Hr1G059280	3.73448	3.32623	1.33579	2.49008	0.0127716	0.028186
HORVU5Hr1G060070	1050.35	1.47756	0.103588	14.2638	3.67968e-46	1.12077e-44
HORVU5Hr1G060140	120.795	4.31874	0.302763	14.2645	3.64429e-46	1.11159e-44
HORVU5Hr1G060620	277.606	2.10983	0.137384	15.3572	3.17071e-53	1.10781e-51
HORVU5Hr1G060650	44.5579	3.64488	0.399864	9.1153	7.84564e-20	9.40676e-19
HORVU5Hr1G061140	645.492	1.15555	0.0876119	13.1894	1.01031e-39	2.59805e-38
HORVU5Hr1G061150	255.232	1.45635	0.130299	11.177	5.2868e-29	9.59247e-28
HORVU5Hr1G061160	19.1384	1.76907	0.490382	3.60753	0.000309122	0.000961621
HORVU5Hr1G061170	103.857	1.54586	0.230591	6.70388	2.02954e-11	1.44106e-10
HORVU5Hr1G061440	53.0545	1.57913	0.306015	5.16032	2.46529e-07	1.19824e-06
HORVU5Hr1G061580	228.239	1.86157	0.1452	12.8208	1.25427e-37	3.0094e-36
HORVU5Hr1G061730	1250.58	-1.40456	0.0849891	-16.5263	2.37109e-61	9.92476e-60
HORVU5Hr1G061820	7.69452	2.65846	0.742597	3.57995	0.000343655	0.00106077
HORVU5Hr1G061860	6.64254	4.46368	1.24278	3.59168	0.000328551	0.00101668
HORVU5Hr1G061930	472.402	3.93601	0.149594	26.3112	1.42608e-152	1.98319e-150
HORVU5Hr1G061950	472.671	3.72324	0.130211	28.594	7.97464e-180	1.37047e-177
HORVU5Hr1G062120	88.248	-1.23298	0.207809	-5.93322	2.97044e-09	1.7534e-08
HORVU5Hr1G062160	45.2138	1.17085	0.291339	4.01885	5.8483e-05	0.000207279
HORVU5Hr1G062300	72.7247	2.35645	0.291476	8.08453	6.24059e-16	6.06221e-15
HORVU5Hr1G062320	7.63283	-2.44966	0.770213	-3.1805	0.0014702	0.00403337
HORVU5Hr1G062410	5093.5	2.8847	0.0888659	32.4613	3.75231e-231	1.004e-228
HORVU5Hr1G062490	309.066	1.32033	0.117215	11.2642	1.97118e-29	3.62006e-28
HORVU5Hr1G062820	3.6566	2.74257	1.10444	2.48321	0.0130203	0.0286869
HORVU5Hr1G062860	28.1746	3.41204	0.495327	6.88846	5.64016e-12	4.19351e-11
HORVU5Hr1G063270	132.701	2.34289	0.219961	10.6514	1.71803e-26	2.8416e-25
HORVU5Hr1G063330	67.4972	3.94819	0.343651	11.489	1.4991e-30	2.89124e-29
HORVU5Hr1G063340	266.473	2.9891	0.181086	16.5065	3.29248e-61	1.37001e-59
HORVU5Hr1G063360	59.049	-1.26635	0.248639	-5.09315	3.52164e-07	1.68379e-06
HORVU5Hr1G063390	65.8393	-1.3472	0.263566	-5.11141	3.19763e-07	1.53582e-06
HORVU5Hr1G063430	117.639	2.36959	0.201649	11.7511	6.97249e-32	1.405e-30
HORVU5Hr1G063440	235.96	1.57582	0.146673	10.7438	6.33713e-27	1.06736e-25
HORVU5Hr1G063480	531.22	2.01083	0.0988797	20.3361	6.16355e-92	4.34284e-90
HORVU5Hr1G063510	77.9449	4.30619	0.390077	11.0393	2.46906e-28	4.35287e-27
HORVU5Hr1G063540	74.9442	4.47184	0.365748	12.2266	2.24223e-34	4.90138e-33
HORVU5Hr1G063590	7.16626	-1.78036	0.680544	-2.61609	0.00889444	0.0204093
HORVU5Hr1G063600	16.4423	1.51399	0.49438	3.06239	0.00219574	0.00581259
HORVU5Hr1G063630	19.7296	-1.34242	0.443802	-3.02481	0.00248787	0.00650913
HORVU5Hr1G063810	47.3114	1.02661	0.277706	3.69675	0.000218379	0.000698878
HORVU5Hr1G064020	3348.4	1.63339	0.0644099	25.3593	7.10135e-142	8.72723e-140
HORVU5Hr1G065420	171.808	3.77376	0.248486	15.187	4.31206e-52	1.47251e-50
HORVU5Hr1G065470	11.1095	1.74277	0.663122	2.62812	0.00858577	0.0198129
HORVU5Hr1G065620	7838	2.27859	0.0790085	28.8398	6.79756e-183	1.17776e-180
HORVU5Hr1G066250	282.153	3.31689	0.370455	8.95356	3.44209e-19	4.01761e-18
HORVU5Hr1G066260	1123.76	1.97455	0.0781763	25.2577	9.32204e-141	1.126e-138
HORVU5Hr1G066360	1336.18	2.35042	0.109065	21.5507	5.21884e-103	4.2593e-101
HORVU5Hr1G066460	10.4459	2.57916	0.738982	3.49015	0.000482744	0.00144885
HORVU5Hr1G066930	217.234	1.02242	0.142855	7.15705	8.24288e-13	6.4771e-12
HORVU5Hr1G066950	73.6325	1.19886	0.241709	4.95993	7.05201e-07	3.26111e-06
HORVU5Hr1G067570	2201.38	1.46344	0.0664493	22.0234	1.71686e-107	1.46927e-105
HORVU5Hr1G067750	256.096	2.1138	0.134034	15.7707	4.95099e-56	1.82642e-54
HORVU5Hr1G067800	673.033	1.11755	0.106027	10.5402	5.6363e-26	9.13651e-25
HORVU5Hr1G068060	1199.74	1.4014	0.0852941	16.4302	1.16244e-60	4.76194e-59
HORVU5Hr1G068320	939.303	1.37786	0.0829633	16.6081	6.09391e-62	2.60229e-60
ENSRNA050015356	11.6463	-1.93614	0.79706	-2.42911	0.015136	0.0327757
HORVU5Hr1G069040	69.5761	1.03594	0.286499	3.61586	0.000299356	0.000933991
HORVU5Hr1G069750	44.064	4.04328	0.400603	10.093	5.93355e-24	8.79547e-23
HORVU5Hr1G069980	67.0093	1.63863	0.334074	4.90499	9.34338e-07	4.26107e-06
HORVU5Hr1G070040	279.617	1.53358	0.150003	10.2236	1.55401e-24	2.37003e-23
HORVU5Hr1G070290	464.582	1.46426	0.161426	9.07082	1.1812e-19	1.40587e-18
HORVU5Hr1G070360	1710.17	5.13653	0.103216	49.7651	0	0
HORVU5Hr1G070390	1216.88	1.05614	0.0974725	10.8353	2.3427e-27	4.01296e-26
HORVU5Hr1G070930	14.8937	1.31479	0.508488	2.58569	0.00971844	0.0220914
HORVU5Hr1G071140	3798.02	2.05243	0.0628436	32.6594	5.90032e-234	1.61975e-231
HORVU5Hr1G071590	2.30621	4.32471	1.60971	2.68663	0.00721759	0.016948
HORVU5Hr1G072070	32.855	1.63356	0.382459	4.27121	1.94418e-05	7.42477e-05
HORVU5Hr1G072370	17.9713	1.94424	0.509444	3.8164	0.000135411	0.000451091
HORVU5Hr1G072480	4798.08	1.99513	0.0590878	33.7655	6.32834e-250	2.0268e-247
HORVU5Hr1G072520	731.959	3.5697	0.109392	32.6321	1.43759e-233	3.89586e-231
HORVU5Hr1G072540	53.1621	1.7581	0.26552	6.62134	3.55949e-11	2.47339e-10
HORVU5Hr1G072760	36.9695	2.1852	0.368714	5.92654	3.09389e-09	1.82321e-08
HORVU5Hr1G072770	692.226	2.00239	0.118678	16.8724	7.1765e-64	3.16035e-62
HORVU5Hr1G073130	21.7105	-1.10975	0.39332	-2.82149	0.00478019	0.0116949
HORVU5Hr1G073740	173.596	1.09736	0.164154	6.68493	2.31033e-11	1.63058e-10
HORVU5Hr1G073870	134.006	1.35216	0.17192	7.8651	3.68804e-15	3.40724e-14
HORVU5Hr1G074030	57.8549	1.15428	0.299711	3.85132	0.000117482	0.000396051
HORVU5Hr1G074110	290.036	4.19677	0.186437	22.5104	3.28257e-112	2.95263e-110
HORVU5Hr1G074900	31.7533	1.20857	0.309921	3.89961	9.63494e-05	0.000330033
HORVU5Hr1G075050	242.437	1.83424	0.128955	14.2239	6.51451e-46	1.97001e-44
HORVU5Hr1G075060	55.773	1.06995	0.27878	3.83795	0.000124064	0.000415999
HORVU5Hr1G075510	57.7177	1.50487	0.253563	5.93489	2.94038e-09	1.73808e-08
HORVU5Hr1G075540	51.3946	1.68578	0.32564	5.17681	2.25706e-07	1.10261e-06
HORVU5Hr1G075670	36.1793	1.82832	0.38738	4.71969	2.36206e-06	1.02377e-05
HORVU5Hr1G076250	1517.62	2.96228	0.118903	24.9134	5.32442e-137	6.15014e-135
HORVU5Hr1G076410	61.8163	5.65051	0.515367	10.964	5.68973e-28	9.93143e-27
HORVU5Hr1G076430	35.2714	2.04543	0.362041	5.64971	1.60716e-08	8.88159e-08
HORVU5Hr1G076510	34.5349	1.95647	0.356791	5.48352	4.16944e-08	2.20665e-07
HORVU5Hr1G076690	6.46283	-4.0326	1.19993	-3.3607	0.000777453	0.00224651
ENSRNA049478755	48.1714	-1.43594	0.289897	-4.95326	7.29795e-07	3.36601e-06
HORVU5Hr1G077450	13.5118	1.44978	0.518158	2.79795	0.00514278	0.0124791
HORVU5Hr1G077580	26.7904	2.10507	0.440322	4.78075	1.74639e-06	7.7164e-06
HORVU5Hr1G077700	113.79	1.58277	0.207595	7.62431	2.45348e-14	2.15552e-13
HORVU5Hr1G077920	567.698	2.62818	0.141482	18.5761	5.01522e-77	2.81946e-75
HORVU5Hr1G078100	65.4796	1.71562	0.270299	6.3471	2.1941e-10	1.4341e-09
HORVU5Hr1G078630	108.501	1.6283	0.188531	8.63676	5.78294e-18	6.31404e-17
HORVU5Hr1G078950	2066.18	1.08814	0.117379	9.27031	1.85605e-20	2.29568e-19
HORVU5Hr1G079380	9.0438	3.92199	0.971857	4.03557	5.44702e-05	0.000193935
HORVU5Hr1G079610	11.2786	4.66828	1.00227	4.6577	3.19764e-06	1.36672e-05
HORVU5Hr1G079670	368.831	2.11142	0.151264	13.9585	2.79224e-44	8.05217e-43
HORVU5Hr1G079690	223.212	1.13548	0.131364	8.64374	5.4402e-18	5.94904e-17
HORVU5Hr1G079940	16.9289	1.13899	0.465803	2.44522	0.0144763	0.0314895
HORVU5Hr1G080220	60.7387	-1.30675	0.312939	-4.17574	2.97015e-05	0.000110184
HORVU5Hr1G080310	29.0311	-1.3133	0.372783	-3.52297	0.000426735	0.00129398
HORVU5Hr1G080420	13.1582	2.9494	0.69933	4.21747	2.47059e-05	9.28416e-05
HORVU5Hr1G080500	288.241	1.0735	0.165768	6.4759	9.42509e-11	6.32669e-10
HORVU5Hr1G080630	14.757	-4.58056	0.856822	-5.34599	8.99229e-08	4.60128e-07
HORVU5Hr1G080820	6.10012	6.21894	1.39159	4.46895	7.8606e-06	3.1941e-05
HORVU5Hr1G081060	129.752	-1.493	0.199211	-7.4946	6.65018e-14	5.64544e-13
HORVU5Hr1G081720	9.79249	-1.56543	0.543131	-2.88224	0.0039486	0.00985425
HORVU5Hr1G081840	282.737	1.86967	0.123654	15.1201	1.19277e-51	4.03404e-50
HORVU5Hr1G081860	3207.91	2.50491	0.062624	39.9991	0	0
HORVU5Hr1G081950	339.079	5.72634	0.232996	24.5769	2.22975e-133	2.49378e-131
HORVU5Hr1G082160	211.534	1.05896	0.257762	4.10827	3.98638e-05	0.000144933
HORVU5Hr1G082310	209.895	1.91087	0.170792	11.1883	4.6535e-29	8.4652e-28
HORVU5Hr1G082610	8.26812	2.06097	0.818833	2.51695	0.0118374	0.026375
HORVU5Hr1G083090	8.3345	3.1802	1.38941	2.28889	0.0220857	0.0458188
HORVU5Hr1G083100	6.42079	3.06462	1.01871	3.00832	0.00262696	0.00683346
HORVU5Hr1G083110	27.175	2.45045	0.448025	5.46945	4.51447e-08	2.38269e-07
HORVU5Hr1G083320	2.6648	5.51597	1.58605	3.4778	0.000505541	0.00151233
HORVU5Hr1G084100	2937.44	1.31754	0.0779919	16.8933	5.04335e-64	2.23026e-62
HORVU5Hr1G084130	4.88819	-3.77427	1.05465	-3.57869	0.000345317	0.00106575
HORVU5Hr1G084700	138.219	1.22698	0.200276	6.12647	8.98507e-10	5.57459e-09
HORVU5Hr1G084740	188.578	1.9979	0.173884	11.4898	1.4842e-30	2.86511e-29
HORVU5Hr1G084980	39.6145	1.82923	0.353585	5.17338	2.29901e-07	1.12206e-06
HORVU5Hr1G085020	161.442	1.18959	0.148841	7.99234	1.32397e-15	1.26007e-14
HORVU5Hr1G085310	2307.04	1.22742	0.0758468	16.1829	6.65355e-59	2.62884e-57
HORVU5Hr1G085780	19.0606	1.31631	0.425645	3.09251	0.00198474	0.00530116
HORVU5Hr1G086370	7.28254	-1.99436	0.758063	-2.63086	0.00851699	0.0196776
HORVU5Hr1G086660	8.51393	1.97514	0.735108	2.68687	0.00721245	0.0169394
HORVU5Hr1G086670	1592.56	-1.49875	0.0785434	-19.0817	3.58107e-81	2.12631e-79
HORVU5Hr1G087210	38.413	1.87457	0.323127	5.80133	6.57894e-09	3.75447e-08
HORVU5Hr1G087240	73.247	3.38097	0.325398	10.3903	2.74578e-25	4.30247e-24
HORVU5Hr1G087250	1347.34	-1.08217	0.161755	-6.69019	2.22874e-11	1.5751e-10
HORVU5Hr1G087320	7.53075	4.67072	1.14767	4.06973	4.70675e-05	0.000169318
HORVU5Hr1G087380	3.29466	3.27808	1.31506	2.49272	0.0126768	0.0280061
HORVU5Hr1G087440	5.39471	6.28031	1.36562	4.59888	4.24777e-06	1.78756e-05
HORVU5Hr1G087730	45.709	1.06044	0.255618	4.14854	3.34599e-05	0.000123133
HORVU5Hr1G087780	460.919	2.31286	0.104055	22.2272	1.87413e-109	1.637e-107
HORVU5Hr1G087880	554.433	1.08876	0.100672	10.8149	2.92478e-27	4.98179e-26
HORVU5Hr1G088260	9.95693	3.615	0.814862	4.43634	9.1503e-06	3.67857e-05
HORVU5Hr1G088300	660.122	1.08757	0.087886	12.3748	3.57637e-35	7.95761e-34
HORVU5Hr1G088530	74.4858	1.60151	0.257034	6.23073	4.6427e-10	2.94972e-09
HORVU5Hr1G089050	232.637	2.28076	0.198937	11.4648	1.98322e-30	3.80066e-29
HORVU5Hr1G089070	208.031	2.37362	0.236355	10.0426	9.90243e-24	1.44756e-22
HORVU5Hr1G089090	11.6492	3.21758	0.812484	3.96017	7.48953e-05	0.000261373
HORVU5Hr1G089100	12.0011	1.98641	0.651643	3.04831	0.00230135	0.00607238
HORVU5Hr1G089620	1002.36	2.08256	0.0857365	24.2903	2.48511e-130	2.72178e-128
HORVU5Hr1G089740	14.4723	2.29899	0.552023	4.16466	3.11815e-05	0.00011527
HORVU5Hr1G089840	29.756	2.87719	0.44684	6.43897	1.20288e-10	8.01843e-10
HORVU5Hr1G091230	2.93353	4.58444	1.46555	3.12813	0.00175922	0.00475286
HORVU5Hr1G091920	52.5746	1.19046	0.316042	3.76677	0.000165375	0.000543907
HORVU5Hr1G092000	285.096	1.10838	0.161272	6.87274	6.29796e-12	4.65476e-11
HORVU5Hr1G092210	5.81562	3.26093	1.07524	3.03274	0.00242342	0.00636041
HORVU5Hr1G092290	13.4562	3.83829	0.742262	5.17108	2.32751e-07	1.13492e-06
HORVU5Hr1G093090	19.0236	3.35146	0.63806	5.25257	1.49992e-07	7.49356e-07
HORVU5Hr1G093260	23.098	1.16261	0.387446	3.00071	0.00269352	0.00698682
HORVU5Hr1G093290	23.9198	-1.02248	0.386091	-2.64828	0.00809018	0.0187739
HORVU5Hr1G093660	1921.29	-1.58969	0.112944	-14.0751	5.40633e-45	1.59385e-43
HORVU5Hr1G093700	85.2221	1.23206	0.233407	5.2786	1.30175e-07	6.53353e-07
HORVU5Hr1G093770	8.87264	3.61416	0.915236	3.94888	7.85175e-05	0.000273472
HORVU5Hr1G093950	71.2676	5.55093	0.486609	11.4074	3.84109e-30	7.23646e-29
HORVU5Hr1G093970	234.924	1.04867	0.139176	7.53487	4.88837e-14	4.20726e-13
HORVU5Hr1G094080	15.232	4.3397	1.10075	3.94247	8.06453e-05	0.00028056
HORVU5Hr1G094220	784.854	-1.01268	0.145949	-6.93861	3.95985e-12	2.97982e-11
HORVU5Hr1G094460	34.6511	1.27865	0.329111	3.88517	0.00010226	0.00034881
HORVU5Hr1G094490	3.89488	3.50344	1.44804	2.41943	0.0155449	0.0335568
HORVU5Hr1G094680	7.55405	4.49092	1.16273	3.86239	0.000112282	0.000379989
HORVU5Hr1G094690	14.3748	7.64396	1.24298	6.14969	7.76367e-10	4.85241e-09
HORVU5Hr1G094700	859.538	4.69366	0.140472	33.4136	8.70352e-245	2.55521e-242
HORVU5Hr1G094710	261.973	5.20685	0.230451	22.5942	4.9462e-113	4.54577e-111
HORVU5Hr1G095020	144.915	1.33642	0.194049	6.887	5.69814e-12	4.23514e-11
HORVU5Hr1G095060	5.92206	2.61566	0.925503	2.8262	0.00471039	0.0115441
HORVU5Hr1G095080	1736.16	1.08967	0.0953992	11.4222	3.23871e-30	6.1289e-29
HORVU5Hr1G095120	18.1905	2.75287	0.538776	5.10949	3.23024e-07	1.55007e-06
HORVU5Hr1G096000	26.3907	2.00423	0.418714	4.78665	1.69591e-06	7.50589e-06
HORVU5Hr1G096090	4.45141	3.19394	1.23599	2.58411	0.0097632	0.022186
HORVU5Hr1G096210	712.198	3.44329	0.114211	30.1485	1.12168e-199	2.2581e-197
HORVU5Hr1G096370	1947.8	1.59616	0.0826403	19.3145	4.05719e-83	2.47864e-81
HORVU5Hr1G096630	9.78966	-1.84535	0.72054	-2.56107	0.0104351	0.0235534
HORVU5Hr1G096830	7.35731	-2.49134	0.770282	-3.23433	0.0012193	0.00340065
HORVU5Hr1G096900	4.251	4.57733	1.33976	3.41653	0.00063425	0.00186516
HORVU5Hr1G096930	536.344	1.08356	0.103183	10.5013	8.5169e-26	1.36283e-24
HORVU5Hr1G096950	655.535	1.14274	0.0970978	11.7689	5.64488e-32	1.14183e-30
HORVU5Hr1G097130	107.688	1.3184	0.218916	6.02238	1.71867e-09	1.03961e-08
HORVU5Hr1G097150	397.792	1.3542	0.124811	10.85	1.99425e-27	3.42441e-26
HORVU5Hr1G097220	128.414	1.3623	0.161491	8.43577	3.29042e-17	3.43302e-16
HORVU5Hr1G097260	3.51776	5.14984	1.41517	3.63903	0.000273666	0.000859548
HORVU5Hr1G097270	1030.49	5.14257	0.123298	41.7084	0	0
HORVU5Hr1G097500	759.939	1.31525	0.105228	12.499	7.55901e-36	1.7144e-34
HORVU5Hr1G098030	361.519	1.60393	0.126578	12.6715	8.5039e-37	1.97968e-35
HORVU5Hr1G098090	262.776	1.2086	0.132171	9.14418	6.00864e-20	7.24533e-19
HORVU5Hr1G098630	29.3416	4.70135	0.618241	7.60441	2.86216e-14	2.50312e-13
HORVU5Hr1G098640	743.441	3.65919	0.122307	29.9181	1.14303e-196	2.25808e-194
HORVU5Hr1G098770	203.298	1.0399	0.143086	7.26762	3.65873e-13	2.95861e-12
HORVU5Hr1G098780	685.102	1.51429	0.0945508	16.0157	9.93375e-58	3.81781e-56
HORVU5Hr1G098800	69.5086	1.78999	0.65364	2.7385	0.00617204	0.0146969
HORVU5Hr1G098820	1150.21	1.06349	0.0647438	16.4261	1.24423e-60	5.08715e-59
HORVU5Hr1G099330	76.2749	3.20101	0.284122	11.2663	1.92445e-29	3.53731e-28
HORVU5Hr1G099390	64.3167	2.13598	0.265339	8.05	8.27942e-16	7.99314e-15
HORVU5Hr1G099410	341.048	-1.12352	0.120684	-9.30958	1.28336e-20	1.60329e-19
HORVU5Hr1G099470	67.9799	2.64542	0.274604	9.63359	5.76764e-22	7.75057e-21
HORVU5Hr1G099700	370.032	1.55812	0.121582	12.8154	1.34438e-37	3.22193e-36
HORVU5Hr1G099940	4.27558	3.56043	1.24017	2.87093	0.00409269	0.0101742
HORVU5Hr1G100150	299.603	1.31763	0.125665	10.4853	1.00892e-25	1.60834e-24
HORVU5Hr1G100890	19.6391	-1.7246	0.501311	-3.44018	0.000581327	0.00172199
HORVU5Hr1G101820	116.546	1.2227	0.204975	5.96511	2.44469e-09	1.46018e-08
HORVU5Hr1G102070	7.77219	2.12299	0.847893	2.50384	0.0122853	0.0272522
HORVU5Hr1G102130	22.5646	-1.41085	0.398023	-3.54465	0.00039314	0.00120038
HORVU5Hr1G102140	2.65536	3.97016	1.57639	2.51852	0.011785	0.0262775
HORVU5Hr1G102250	69.237	-1.26097	0.286357	-4.40351	1.06516e-05	4.24176e-05
HORVU5Hr1G102280	8.30451	1.73253	0.702254	2.4671	0.0136212	0.0298399
HORVU5Hr1G102530	12715.7	-1.23347	0.0759538	-16.2397	2.6432e-59	1.05419e-57
HORVU5Hr1G102620	9313.69	-1.31042	0.0573742	-22.8399	1.84118e-115	1.75184e-113
HORVU5Hr1G102900	5062.8	3.75976	0.0711794	52.8209	0	0
HORVU5Hr1G103400	26.3346	1.2926	0.374347	3.45295	0.000554498	0.00164552
HORVU5Hr1G103420	6.57434	2.63858	0.912294	2.89224	0.00382503	0.0095696
HORVU5Hr1G103450	22.3685	-1.26295	0.412793	-3.05952	0.00221694	0.00586652
HORVU5Hr1G103590	417.776	1.31667	0.103267	12.7502	3.11132e-37	7.31558e-36
HORVU5Hr1G103620	147.657	1.3272	0.25967	5.11112	3.20259e-07	1.53751e-06
HORVU5Hr1G103990	786.935	2.0655	0.106971	19.3089	4.51823e-83	2.75234e-81
HORVU5Hr1G104070	63.4355	1.56985	0.254243	6.17461	6.63249e-10	4.17131e-09
HORVU5Hr1G104580	523.917	1.56679	0.107518	14.5723	4.21474e-48	1.3357e-46
HORVU5Hr1G104600	6.96674	2.16614	0.913307	2.37175	0.0177039	0.0376597
HORVU5Hr1G104620	269.41	1.87768	0.150093	12.5101	6.57524e-36	1.4961e-34
HORVU5Hr1G104640	7.22211	2.38563	0.808723	2.94987	0.0031791	0.00811619
HORVU5Hr1G104670	171.373	3.5626	0.202023	17.6346	1.33648e-69	6.60057e-68
HORVU5Hr1G104800	258.893	1.22051	0.179173	6.81191	9.6313e-12	7.03234e-11
HORVU5Hr1G105480	471.403	1.40766	0.0955854	14.7267	4.34507e-49	1.39796e-47
HORVU5Hr1G105780	27.8835	1.56931	0.402079	3.90299	9.50103e-05	0.000325974
HORVU5Hr1G105900	23.8556	1.7079	0.444851	3.83926	0.000123405	0.000413922
HORVU5Hr1G105930	102.597	3.64917	0.284889	12.8091	1.45837e-37	3.48329e-36
HORVU5Hr1G106000	3.26892	5.3862	1.45051	3.71331	0.000204562	0.000658751
HORVU5Hr1G106010	3406.51	4.85855	0.211773	22.9422	1.76316e-116	1.70181e-114
HORVU5Hr1G106090	12.0964	-1.29864	0.474077	-2.7393	0.0061571	0.0146696
HORVU5Hr1G106110	105.779	-1.5391	0.176802	-8.7052	3.17028e-18	3.51039e-17
HORVU5Hr1G106120	6033.45	-1.2993	0.084818	-15.3187	5.73493e-53	1.99056e-51
HORVU5Hr1G106460	205.282	1.02396	0.149071	6.86893	6.46839e-12	4.77739e-11
HORVU5Hr1G108670	70.8337	1.84964	0.238886	7.74276	9.72848e-15	8.7395e-14
HORVU5Hr1G108750	131.737	1.00803	0.183672	5.48821	4.06025e-08	2.1521e-07
HORVU5Hr1G108870	9.5867	5.09074	1.29158	3.94148	8.09812e-05	0.000281583
HORVU5Hr1G109040	127.742	1.24415	0.199516	6.23583	4.49398e-10	2.86126e-09
HORVU5Hr1G109100	28.7643	4.06475	0.564056	7.20629	5.74987e-13	4.5778e-12
HORVU5Hr1G109190	1504.91	4.00168	0.10325	38.7573	0	0
HORVU5Hr1G109360	228.423	-1.1133	0.208579	-5.33754	9.42172e-08	4.8059e-07
HORVU5Hr1G109760	84.0205	1.34758	0.255495	5.27439	1.33199e-07	6.67678e-07
HORVU5Hr1G110100	67.8354	1.03745	0.216272	4.79696	1.6109e-06	7.1476e-06
HORVU5Hr1G110180	215.615	3.23434	0.23774	13.6045	3.76504e-42	1.0309e-40
HORVU5Hr1G110220	36.5995	2.12073	0.455225	4.65864	3.18301e-06	1.36089e-05
HORVU5Hr1G110440	290.849	2.52896	0.148266	17.0569	3.10723e-65	1.41248e-63
HORVU5Hr1G110680	15.8137	2.4279	0.524487	4.62909	3.67282e-06	1.55865e-05
HORVU5Hr1G110890	80.4176	1.20648	0.220664	5.4675	4.56417e-08	2.40652e-07
HORVU5Hr1G111000	75.7372	1.45839	0.224571	6.4941	8.35317e-11	5.63759e-10
HORVU5Hr1G111040	14.8622	1.32486	0.529594	2.50166	0.0123614	0.0273923
HORVU5Hr1G111240	57.3585	3.52818	0.352377	10.0125	1.3428e-23	1.94945e-22
HORVU5Hr1G111520	91.0734	2.07723	0.208951	9.94122	2.7543e-23	3.92586e-22
HORVU5Hr1G111810	46.8785	-1.45548	0.295162	-4.93114	8.17528e-07	3.7502e-06
HORVU5Hr1G112130	221.4	1.05532	0.147608	7.14951	8.70857e-13	6.83556e-12
HORVU5Hr1G112210	359.002	1.77543	0.118133	15.0291	4.73653e-51	1.58419e-49
HORVU5Hr1G112280	303.301	1.39483	0.168918	8.25743	1.48841e-16	1.50105e-15
HORVU5Hr1G112530	70.9006	1.26397	0.266426	4.74414	2.09389e-06	9.14099e-06
HORVU5Hr1G112620	29.0786	-1.35242	0.362588	-3.72989	0.00019156	0.000620376
HORVU5Hr1G112820	2.92854	3.94699	1.42002	2.77953	0.00544383	0.013142
HORVU5Hr1G112900	24.1487	1.58737	0.415764	3.81795	0.000134565	0.000448627
HORVU5Hr1G112930	42.7366	1.92116	0.328149	5.85454	4.7833e-09	2.7724e-08
HORVU5Hr1G112960	9.61801	2.53574	0.736543	3.44276	0.000575809	0.00170612
HORVU5Hr1G113580	45.325	-2.64194	0.311313	-8.48643	2.13083e-17	2.25207e-16
HORVU5Hr1G114030	30.2785	2.20354	0.35575	6.19405	5.86373e-10	3.69993e-09
HORVU5Hr1G114070	24.0181	1.45896	0.37802	3.85948	0.000113629	0.000384091
HORVU5Hr1G114140	250.708	-1.0536	0.111042	-9.48831	2.34807e-21	3.03569e-20
HORVU5Hr1G114220	92.0298	1.42037	0.200104	7.09818	1.26413e-12	9.80593e-12
HORVU5Hr1G114700	658.963	4.12524	0.134321	30.7118	3.95764e-207	8.53638e-205
HORVU5Hr1G114920	519.577	1.60656	0.0986079	16.2924	1.11674e-59	4.50489e-58
HORVU5Hr1G115230	3907.09	1.71427	0.0579092	29.6028	1.37608e-192	2.55153e-190
HORVU5Hr1G115240	74.2695	1.19442	0.289679	4.12328	3.7352e-05	0.000136246
HORVU5Hr1G115250	175.216	-1.43154	0.228112	-6.27558	3.48325e-10	2.23796e-09
HORVU5Hr1G115750	50.4696	1.98442	0.29154	6.8067	9.98627e-12	7.2865e-11
HORVU5Hr1G115870	952.667	4.29322	0.109414	39.2382	0	0
HORVU5Hr1G115880	2.94039	5.32742	1.4394	3.70112	0.000214646	0.000688183
HORVU5Hr1G115900	39.8846	4.54803	0.500401	9.08877	1.00163e-19	1.19483e-18
HORVU5Hr1G116920	95.4658	2.16953	0.278618	7.78675	6.87531e-15	6.24003e-14
HORVU5Hr1G117480	1011.52	1.34834	0.107635	12.527	5.31426e-36	1.21179e-34
HORVU5Hr1G117670	71.1756	1.30544	0.258662	5.04688	4.4909e-07	2.12226e-06
HORVU5Hr1G117900	853.706	1.04855	0.100187	10.4659	1.23844e-25	1.96533e-24
HORVU5Hr1G117910	3421.45	2.56761	0.0926575	27.7108	5.17848e-169	8.23028e-167
HORVU5Hr1G118060	124.232	1.1198	0.202473	5.53063	3.19079e-08	1.70278e-07
HORVU5Hr1G118320	2.86368	5.03624	1.7215	2.9255	0.00343902	0.00871318
HORVU5Hr1G118590	193.757	5.47299	0.285183	19.1911	4.38832e-82	2.63523e-80
HORVU5Hr1G118680	18.8339	-1.44254	0.475007	-3.03689	0.00239035	0.00628369
HORVU5Hr1G118720	28.6249	-1.20751	0.354354	-3.40763	0.000655296	0.00192064
HORVU5Hr1G118800	39.0644	1.6749	0.295094	5.67582	1.3803e-08	7.67405e-08
HORVU5Hr1G118820	92.9866	-1.17508	0.250031	-4.69976	2.60472e-06	1.12387e-05
HORVU5Hr1G119270	72.4507	1.03588	0.211503	4.89773	9.69524e-07	4.41867e-06
HORVU5Hr1G119720	3.2787	3.92408	1.44876	2.70859	0.006757	0.0159693
HORVU5Hr1G119820	9.97913	1.69201	0.621159	2.72396	0.00645052	0.015298
HORVU5Hr1G120300	66.378	1.70831	0.235491	7.25425	4.03883e-13	3.24735e-12
HORVU5Hr1G120420	45.9504	2.44186	0.312746	7.8078	5.81958e-15	5.31379e-14
HORVU5Hr1G120600	534.211	1.14718	0.0910804	12.5952	2.24429e-36	5.15089e-35
HORVU5Hr1G120630	65.5009	-2.02976	0.273661	-7.41706	1.19749e-13	9.97737e-13
HORVU5Hr1G120800	505.022	1.22443	0.091814	13.336	1.42971e-40	3.77764e-39
HORVU5Hr1G120810	156.598	1.52784	0.227603	6.71274	1.91e-11	1.35938e-10
HORVU5Hr1G121430	210.648	1.08266	0.173607	6.23628	4.48109e-10	2.85477e-09
HORVU5Hr1G121540	349.608	1.05049	0.112493	9.33831	9.78821e-21	1.23083e-19
HORVU5Hr1G121940	63.846	2.40195	0.289529	8.29607	1.07613e-16	1.09362e-15
HORVU5Hr1G122060	31.5252	3.72215	0.906112	4.10783	3.99397e-05	0.000145184
HORVU5Hr1G122150	388.817	1.1399	0.182087	6.26017	3.8456e-10	2.46104e-09
HORVU5Hr1G122390	1852.87	6.03984	0.132365	45.63	0	0
HORVU5Hr1G122510	54.4132	3.12367	0.306493	10.1917	2.16026e-24	3.26169e-23
HORVU5Hr1G122530	4.14655	5.16787	1.49548	3.45567	0.000548934	0.00162963
HORVU5Hr1G122540	18.8358	2.56172	0.591848	4.32834	1.50239e-05	5.84207e-05
HORVU5Hr1G122660	13.7942	3.08823	0.642268	4.80832	1.52202e-06	6.77456e-06
HORVU5Hr1G122860	695.51	-5.15456	0.174188	-29.5919	1.89706e-192	3.48696e-190
HORVU5Hr1G122950	422.863	1.82805	0.203843	8.96795	3.02081e-19	3.53369e-18
HORVU5Hr1G122960	13.1843	3.60642	0.860004	4.19349	2.74695e-05	0.000102444
HORVU5Hr1G122990	11.1551	2.2018	0.674416	3.26475	0.00109562	0.00308584
HORVU5Hr1G123120	31.9687	1.02191	0.328784	3.10815	0.00188265	0.00505659
HORVU5Hr1G123280	4.58147	-5.5721	1.47544	-3.77658	0.000158998	0.000524322
HORVU5Hr1G123540	122.541	3.63732	0.228576	15.913	5.15149e-57	1.93071e-55
HORVU5Hr1G123550	332.419	3.65788	0.141607	25.8313	3.9503e-147	5.06069e-145
HORVU5Hr1G123590	620.34	1.24984	0.109418	11.4226	3.22477e-30	6.10799e-29
HORVU5Hr1G123970	118.366	-2.76316	0.208403	-13.2587	4.01676e-40	1.04693e-38
HORVU5Hr1G124010	672.936	-1.08522	0.104042	-10.4306	1.79681e-25	2.83651e-24
HORVU5Hr1G124030	74.375	1.37268	0.223806	6.13333	8.60564e-10	5.35018e-09
HORVU5Hr1G124090	289.787	-1.04734	0.125167	-8.36755	5.88282e-17	6.0482e-16
HORVU5Hr1G124160	2302.4	-1.00332	0.275913	-3.63636	0.00027652	0.000867351
HORVU5Hr1G124320	27.4099	1.11876	0.369064	3.03134	0.00243471	0.00638601
HORVU5Hr1G124350	913.249	1.05541	0.0753393	14.0087	1.37861e-44	4.01392e-43
HORVU5Hr1G124380	8596.23	-1.21962	0.104064	-11.7199	1.00849e-31	2.01108e-30
HORVU5Hr1G124390	75.7565	1.44229	0.237004	6.0855	1.16125e-09	7.1294e-09
HORVU5Hr1G124430	76.7242	-1.26186	0.314016	-4.01847	5.85781e-05	0.000207581
HORVU5Hr1G124450	29.0999	1.80453	0.379166	4.7592	1.94359e-06	8.53241e-06
HORVU5Hr1G124590	74.688	4.3545	0.343755	12.6675	8.95583e-37	2.0826e-35
HORVU5Hr1G124650	1569.47	4.09737	0.101759	40.2655	0	0
HORVU5Hr1G124800	156.331	4.69213	0.251751	18.6379	1.58252e-77	8.92037e-76
HORVU5Hr1G124810	360.43	4.2291	0.165909	25.4905	2.5136e-143	3.12544e-141
HORVU5Hr1G124820	222.136	4.12918	0.250642	16.4744	5.60533e-61	2.32324e-59
HORVU5Hr1G124880	51.9579	-1.63759	0.278589	-5.87815	4.14878e-09	2.41523e-08
HORVU5Hr1G125000	105.035	3.86498	0.315547	12.2485	1.71131e-34	3.74856e-33
HORVU5Hr1G125120	168.715	-2.89773	0.175735	-16.4892	4.38676e-61	1.82176e-59
HORVU5Hr1G125290	42.2146	1.40869	0.346423	4.06639	4.77478e-05	0.000171619
HORVU5Hr1G125340	4.56372	-5.81312	1.3836	-4.20146	2.65204e-05	9.91488e-05
HORVU5Hr1G125350	21.7646	-7.97514	1.23089	-6.47917	9.22299e-11	6.19497e-10
HORVU5Hr1G125360	5.19934	-6.15645	1.36104	-4.52333	6.08733e-06	2.5112e-05
HORVU5Hr1G125400	11.1844	1.7585	0.647963	2.71389	0.00664981	0.0157371
HORVU5Hr1G125410	222.85	-1.22399	0.140445	-8.71505	2.90618e-18	3.2281e-17
HORVU5Hr1G125560	18.9749	-1.88402	0.453884	-4.15089	3.31185e-05	0.000121962
HORVU5Hr1G125600	2.32468	4.40517	1.59913	2.75473	0.0058741	0.0140492
HORVU5Hr1G125720	3.81251	-4.60176	1.52135	-3.02478	0.00248812	0.00650913
HORVU5Hr1G125780	144.687	4.72022	0.285369	16.5408	1.86611e-61	7.82656e-60
HORVU5Hr1G125800	16.8049	4.91058	0.806145	6.09144	1.11902e-09	6.88013e-09
HORVU5Hr1G125810	31.9185	4.712	0.591596	7.96489	1.65372e-15	1.56404e-14
HORVU7Hr1G000250	74.0559	1.59011	0.239314	6.64447	3.04302e-11	2.1278e-10
HORVU7Hr1G000260	26.0314	2.1757	0.438139	4.96576	6.8431e-07	3.16936e-06
HORVU7Hr1G000530	239.782	5.4575	0.266401	20.486	2.87021e-93	2.07066e-91
HORVU7Hr1G000750	138.607	1.28476	0.189253	6.78856	1.13261e-11	8.23172e-11
HORVU7Hr1G000860	16.8658	1.50112	0.446359	3.36304	0.000770881	0.00222882
HORVU7Hr1G001020	48.1691	1.36601	0.289419	4.71982	2.36057e-06	1.02333e-05
HORVU7Hr1G001030	24.0295	6.03642	1.10787	5.44865	5.07531e-08	2.66605e-07
HORVU7Hr1G001100	25.7512	3.37039	0.470537	7.16287	7.90067e-13	6.22222e-12
HORVU7Hr1G002360	8.22581	4.81844	1.14844	4.19563	2.72111e-05	0.000101516
HORVU7Hr1G002820	79.9507	1.0013	0.213388	4.69239	2.7003e-06	1.16321e-05
HORVU7Hr1G003630	27.8019	3.76374	0.555941	6.77004	1.2875e-11	9.30118e-11
HORVU7Hr1G005270	599.475	2.17619	0.134486	16.1815	6.80836e-59	2.68498e-57
HORVU7Hr1G006320	17.1557	3.20082	0.594269	5.38615	7.19823e-08	3.73115e-07
HORVU7Hr1G006590	972.993	6.23852	0.170213	36.6513	4.35916e-294	2.04764e-291
HORVU7Hr1G006750	2.22145	3.56124	1.56163	2.28046	0.0225803	0.0467073
HORVU7Hr1G006790	4.75157	1.98713	0.873746	2.27426	0.0229503	0.0473954
HORVU7Hr1G006940	25.911	3.97881	0.58021	6.85753	7.00637e-12	5.1603e-11
HORVU7Hr1G006980	2040.69	-1.7976	0.151577	-11.8593	1.9252e-32	3.9433e-31
HORVU7Hr1G007220	55.2875	1.15265	0.29059	3.96659	7.29082e-05	0.000255028
HORVU7Hr1G007480	1174.54	4.17901	0.160163	26.0922	4.47134e-150	6.02008e-148
HORVU7Hr1G007520	439.106	4.7123	0.320087	14.722	4.65912e-49	1.49672e-47
HORVU7Hr1G007540	3115.99	1.63536	0.09211	17.7545	1.59192e-70	7.99288e-69
HORVU7Hr1G007570	10.6466	1.38007	0.565907	2.43869	0.0147404	0.0320131
HORVU7Hr1G007800	284.784	-1.41353	0.122276	-11.5602	6.55575e-31	1.28073e-29
HORVU7Hr1G007810	67.5056	-1.60735	0.238016	-6.75311	1.44713e-11	1.04081e-10
HORVU7Hr1G007950	278.297	-1.11963	0.115438	-9.69896	3.04601e-22	4.15129e-21
HORVU7Hr1G008050	320.991	4.94862	0.205982	24.0246	1.54009e-127	1.62772e-125
HORVU7Hr1G008100	37.4785	-1.00633	0.336331	-2.9921	0.00277068	0.00717113
HORVU7Hr1G008140	931.755	3.80178	0.125995	30.174	5.19615e-200	1.07683e-197
HORVU7Hr1G008170	4.74914	2.94476	1.05455	2.79243	0.00523133	0.0126739
HORVU7Hr1G008210	23.8702	3.28813	0.554604	5.92878	3.05192e-09	1.79948e-08
HORVU7Hr1G008240	4.43369	3.19305	1.3663	2.337	0.0194392	0.040882
HORVU7Hr1G008250	12.0592	2.47734	0.624623	3.96614	7.30453e-05	0.000255381
HORVU7Hr1G008610	120.563	2.65046	0.224976	11.7811	4.88555e-32	9.91081e-31
HORVU7Hr1G008760	458.392	1.7199	0.140728	12.2215	2.38702e-34	5.20711e-33
HORVU7Hr1G008830	92.0419	1.45776	0.218739	6.66439	2.65772e-11	1.86579e-10
HORVU7Hr1G008840	531.744	1.13184	0.138087	8.1966	2.47283e-16	2.46444e-15
HORVU7Hr1G009680	97.0406	2.33128	0.249712	9.3359	1.00136e-20	1.25768e-19
HORVU7Hr1G009770	30.2962	1.1439	0.354156	3.22995	0.00123814	0.00344818
HORVU7Hr1G009940	848.192	1.10295	0.0928171	11.8831	1.44975e-32	2.98683e-31
HORVU7Hr1G010320	445.752	1.27508	0.118696	10.7424	6.43583e-27	1.08226e-25
HORVU7Hr1G010340	60.1679	2.81547	0.296195	9.50545	1.99176e-21	2.58135e-20
HORVU7Hr1G010740	199.589	3.97177	0.203164	19.5496	4.16017e-85	2.59403e-83
HORVU7Hr1G010990	36.2334	1.15939	0.352983	3.28454	0.00102151	0.00288941
HORVU7Hr1G011090	5.05493	5.50275	1.41984	3.87562	0.000106355	0.000361554
HORVU7Hr1G011210	16.9249	1.63831	0.462857	3.53955	0.000400808	0.00122167
HORVU7Hr1G011230	302.702	3.12019	0.150926	20.6737	5.97357e-95	4.43051e-93
HORVU7Hr1G012610	140.426	1.21427	0.217382	5.58588	2.32516e-08	1.26023e-07
HORVU7Hr1G012700	642.602	1.21463	0.0946178	12.8372	1.01476e-37	2.44583e-36
HORVU7Hr1G013170	825.537	3.31605	0.103473	32.0474	2.38353e-225	5.99798e-223
HORVU7Hr1G015690	16.3684	1.22854	0.453871	2.7068	0.00679354	0.0160429
HORVU7Hr1G017790	36.812	1.42251	0.318039	4.47277	7.72128e-06	3.14232e-05
HORVU7Hr1G017800	35.6121	1.01743	0.361744	2.81256	0.00491491	0.0119704
HORVU7Hr1G017810	44.3435	3.85897	0.432401	8.92453	4.47601e-19	5.18149e-18
HORVU7Hr1G017950	465.939	1.63782	0.122344	13.387	7.2073e-41	1.92116e-39
HORVU7Hr1G018000	141.366	1.74772	0.184043	9.49624	2.17605e-21	2.81674e-20
HORVU7Hr1G018100	296.594	1.80016	0.148648	12.1102	9.3251e-34	1.99913e-32
HORVU7Hr1G018190	362.814	1.1681	0.193045	6.05091	1.44029e-09	8.76617e-09
HORVU7Hr1G018590	82.6365	1.12082	0.212184	5.28231	1.27563e-07	6.4109e-07
HORVU7Hr1G018750	106.693	1.26847	0.174889	7.25302	4.07592e-13	3.27468e-12
HORVU7Hr1G019240	82.1698	3.04921	0.341717	8.92321	4.52972e-19	5.24079e-18
HORVU7Hr1G019260	28.202	3.84903	0.552276	6.9694	3.18289e-12	2.40716e-11
HORVU7Hr1G019280	878.303	3.38661	0.1099	30.8154	1.63163e-208	3.55561e-206
HORVU7Hr1G019380	25.4999	2.34515	0.458479	5.11506	3.13646e-07	1.50801e-06
HORVU7Hr1G019390	323.185	3.56524	0.156102	22.8392	1.87268e-115	1.76718e-113
HORVU7Hr1G019400	263	2.92069	0.219722	13.2926	2.55444e-40	6.68265e-39
HORVU7Hr1G019890	26.6026	1.38082	0.430547	3.20712	0.00134069	0.00370985
HORVU7Hr1G020190	12.1602	2.26261	0.607716	3.72313	0.000196765	0.000635577
HORVU7Hr1G020270	7.06715	2.57842	0.945571	2.72684	0.00639442	0.0151752
HORVU7Hr1G020300	100.631	1.02875	0.222803	4.6173	3.88766e-06	1.64388e-05
HORVU7Hr1G020770	27.25	-1.43592	0.39719	-3.61521	0.000300105	0.000936006
HORVU7Hr1G020780	507.979	-1.54736	0.108523	-14.2583	3.97959e-46	1.20863e-44
HORVU7Hr1G020810	52.4099	2.2247	0.26598	8.36415	6.05514e-17	6.21932e-16
HORVU7Hr1G020830	6.09939	-4.35468	1.23195	-3.53479	0.000408093	0.00124226
HORVU7Hr1G020920	154.394	1.42136	0.219589	6.47284	9.61753e-11	6.45177e-10
HORVU7Hr1G021080	1166.87	-1.10875	0.0842701	-13.1571	1.54976e-39	3.97078e-38
HORVU7Hr1G021120	78.4507	-1.77759	0.241201	-7.36972	1.70981e-13	1.4107e-12
HORVU7Hr1G021260	99.4171	3.91922	0.275956	14.2023	8.86156e-46	2.66452e-44
HORVU7Hr1G021460	226.485	-1.03624	0.175908	-5.89081	3.84318e-09	2.24412e-08
HORVU7Hr1G021620	40.9213	-3.10716	0.362006	-8.58319	9.22759e-18	9.94153e-17
HORVU7Hr1G021650	326.008	-1.00388	0.146368	-6.85859	6.95419e-12	5.12366e-11
HORVU7Hr1G021660	93.4654	2.10048	0.274977	7.63875	2.1934e-14	1.93425e-13
HORVU7Hr1G022010	111.382	2.09463	0.266044	7.87325	3.45533e-15	3.20065e-14
HORVU7Hr1G022110	30.2589	1.20146	0.329128	3.65043	0.000261798	0.000824722
HORVU7Hr1G022310	35.0653	1.49862	0.326517	4.5897	4.43887e-06	1.8639e-05
HORVU7Hr1G022910	129.994	1.23508	0.193939	6.36841	1.90994e-10	1.25458e-09
HORVU7Hr1G023030	485.461	1.25524	0.182792	6.86706	6.55381e-12	4.83879e-11
HORVU7Hr1G023600	1481.26	-1.2748	0.124123	-10.2704	9.57963e-25	1.47591e-23
HORVU7Hr1G023750	2.44112	4.68851	1.55137	3.02218	0.00250963	0.00655973
HORVU7Hr1G023770	17.1355	2.2996	0.529616	4.34202	1.41179e-05	5.50599e-05
HORVU7Hr1G024350	811.298	3.28938	0.127758	25.7469	3.49417e-146	4.42275e-144
HORVU7Hr1G024360	18.8369	1.33666	0.50528	2.64539	0.00815977	0.0189228
HORVU7Hr1G024660	41.5139	2.03032	0.32235	6.29851	3.00521e-10	1.94026e-09
HORVU7Hr1G024670	17644.9	1.63469	0.0609304	26.8288	1.49281e-158	2.20664e-156
HORVU7Hr1G024930	910.351	2.94253	0.163527	17.9941	2.1658e-72	1.13318e-70
HORVU7Hr1G024940	39.2037	3.82257	0.429389	8.90235	5.46775e-19	6.28479e-18
HORVU7Hr1G025180	316.72	1.2884	0.125175	10.2928	7.59479e-25	1.17439e-23
HORVU7Hr1G025240	3.63164	5.16633	1.49951	3.44533	0.000570356	0.0016902
HORVU7Hr1G025750	95.2814	1.15158	0.188342	6.11429	9.6989e-10	5.99636e-09
HORVU7Hr1G025780	66.07	1.40875	0.238317	5.91124	3.39541e-09	1.99423e-08
HORVU7Hr1G026570	25.8401	6.45183	1.07857	5.98184	2.20637e-09	1.3257e-08
HORVU7Hr1G026630	14.0587	1.45982	0.568912	2.56598	0.0102886	0.0232673
HORVU7Hr1G026650	12.5171	1.62992	0.567433	2.87245	0.004073	0.0101276
HORVU7Hr1G026660	3.37899	3.87333	1.40961	2.7478	0.00599967	0.014322
HORVU7Hr1G026680	88.8876	1.81227	0.253524	7.14832	8.78443e-13	6.88999e-12
HORVU7Hr1G026740	1253.85	-1.14599	0.244217	-4.69249	2.699e-06	1.16289e-05
HORVU7Hr1G027060	23.3133	-1.29542	0.409344	-3.16462	0.00155284	0.00423918
HORVU7Hr1G027410	5.27124	3.82056	1.19528	3.19638	0.00139163	0.00383924
HORVU7Hr1G028220	204.588	-1.03085	0.167028	-6.1717	6.75577e-10	4.24505e-09
HORVU7Hr1G028370	994.94	2.75072	0.115223	23.873	5.84474e-126	5.99739e-124
HORVU7Hr1G028710	280.734	4.02493	0.185194	21.7336	9.87831e-105	8.22077e-103
HORVU7Hr1G028730	616.977	3.11698	0.119599	26.062	9.82808e-150	1.31485e-147
HORVU7Hr1G028840	312.599	2.20801	0.159396	13.8524	1.23091e-43	3.50659e-42
HORVU7Hr1G029420	162.539	1.43924	0.170731	8.42984	3.46131e-17	3.60775e-16
HORVU7Hr1G029460	258.553	3.57448	0.172742	20.6926	4.03861e-95	3.00592e-93
HORVU7Hr1G029750	689.021	-1.05518	0.0988492	-10.6747	1.33702e-26	2.2236e-25
HORVU7Hr1G029920	31.0069	1.54739	0.356028	4.34625	1.38482e-05	5.40841e-05
HORVU7Hr1G030080	107.282	2.30888	0.200245	11.5303	9.28224e-31	1.8067e-29
HORVU7Hr1G030160	47.4841	2.13142	0.302758	7.04003	1.92199e-12	1.47466e-11
HORVU7Hr1G030190	6.50117	-2.56538	0.911477	-2.81453	0.00488488	0.0119124
HORVU7Hr1G030310	112.199	1.09645	0.196423	5.5821	2.37632e-08	1.28566e-07
HORVU7Hr1G030460	43.4905	4.16403	0.439278	9.47928	2.56054e-21	3.30231e-20
HORVU7Hr1G030500	89.7033	1.37035	0.309436	4.42855	9.48676e-06	3.8001e-05
HORVU7Hr1G030670	3.73249	2.69582	1.17907	2.28639	0.0222313	0.0460892
HORVU7Hr1G030690	88.9719	1.12693	0.24726	4.55769	5.17186e-06	2.15584e-05
HORVU7Hr1G030740	9.63217	3.66957	0.873717	4.19996	2.66967e-05	9.97374e-05
HORVU7Hr1G030800	437.172	-1.11158	0.207613	-5.35409	8.59873e-08	4.41058e-07
HORVU7Hr1G031140	24.3081	-1.05404	0.377312	-2.79354	0.00521341	0.0126348
HORVU7Hr1G031360	56.1416	3.8624	0.37534	10.2904	7.78628e-25	1.20312e-23
HORVU7Hr1G031400	24.3282	1.0294	0.37167	2.76965	0.0056116	0.0134993
HORVU7Hr1G031430	48.5932	1.24923	0.286771	4.35619	1.32346e-05	5.18638e-05
HORVU7Hr1G031650	13.0931	1.79821	0.53695	3.34894	0.000811209	0.00233774
HORVU7Hr1G031680	11.5048	5.57132	1.10765	5.02987	4.90808e-07	2.30908e-06
HORVU7Hr1G031700	80.4094	2.72958	0.244025	11.1857	4.79242e-29	8.70294e-28
HORVU7Hr1G032330	46.4438	1.24431	0.263749	4.71779	2.38417e-06	1.0325e-05
HORVU7Hr1G033390	674.298	1.50463	0.0931226	16.1576	1.00441e-58	3.94633e-57
HORVU7Hr1G033520	1195.39	2.35759	0.0789053	29.8787	3.71894e-196	7.27879e-194
HORVU7Hr1G033530	18684.2	4.67956	0.147548	31.7154	9.53471e-221	2.34354e-218
HORVU7Hr1G033620	16095.8	4.57802	0.10387	44.0744	0	0
HORVU7Hr1G033760	4.43469	2.61395	1.0985	2.37956	0.0173333	0.0369756
HORVU7Hr1G034230	4.17688	4.38854	1.37447	3.19289	0.00140858	0.00388043
HORVU7Hr1G034640	10.5315	-1.29669	0.533726	-2.42951	0.0151191	0.0327446
HORVU7Hr1G034920	4.22793	2.05868	0.890753	2.31117	0.0208237	0.0435124
HORVU7Hr1G035130	256.323	-1.20284	0.207982	-5.78339	7.32096e-09	4.1622e-08
HORVU7Hr1G035190	30.6159	1.44194	0.356474	4.045	5.2323e-05	0.000186825
HORVU7Hr1G035350	19.1639	1.37558	0.416307	3.30424	0.000952336	0.0027068
HORVU7Hr1G035590	14.3071	-1.22349	0.500403	-2.44502	0.0144845	0.0315026
HORVU7Hr1G035770	23.8037	-1.74324	0.420439	-4.14622	3.38003e-05	0.000124234
HORVU7Hr1G035850	380.764	1.48404	0.105108	14.1192	2.89197e-45	8.58575e-44
HORVU7Hr1G035980	39.6044	2.79552	0.348715	8.01663	1.08684e-15	1.04094e-14
HORVU7Hr1G036220	30.588	-1.37811	0.390506	-3.52904	0.000417072	0.00126649
HORVU7Hr1G036370	193.771	2.17866	0.191049	11.4036	4.00964e-30	7.53385e-29
HORVU7Hr1G036380	369.724	1.98209	0.113967	17.3918	9.5124e-68	4.52867e-66
HORVU7Hr1G036390	76.4751	1.39959	0.213725	6.54854	5.81027e-11	3.97854e-10
HORVU7Hr1G036410	70.4091	1.38636	0.269966	5.1353	2.81691e-07	1.36007e-06
HORVU7Hr1G036420	30.3655	2.31634	0.364763	6.35026	2.1495e-10	1.40625e-09
HORVU7Hr1G036430	2.0774	4.84746	1.81284	2.67396	0.00749612	0.017528
HORVU7Hr1G036460	55.5231	-1.05293	0.28607	-3.68066	0.00023263	0.000739781
HORVU7Hr1G036540	2.96428	3.88389	1.48039	2.62356	0.00870155	0.0200341
HORVU7Hr1G036940	39.6824	-1.08032	0.297882	-3.62667	0.000287102	0.000898278
HORVU7Hr1G036960	9.05908	-2.70993	0.746257	-3.63136	0.000281931	0.000882882
HORVU7Hr1G037080	687.555	1.72182	0.0893819	19.2636	1.08533e-82	6.57355e-81
HORVU7Hr1G037510	238.843	2.04082	0.151109	13.5056	1.449e-41	3.92679e-40
HORVU7Hr1G037750	11.095	3.90666	0.775141	5.03994	4.65686e-07	2.19725e-06
HORVU7Hr1G037910	471.323	1.13381	0.115554	9.81193	1.00033e-22	1.39571e-21
HORVU7Hr1G038060	14.5859	-1.33644	0.484019	-2.76112	0.0057603	0.013813
HORVU7Hr1G038160	767.349	1.70025	0.0856723	19.846	1.19385e-87	7.86153e-86
HORVU7Hr1G038170	7.14938	2.81594	0.845152	3.33188	0.000862618	0.00247342
HORVU7Hr1G038200	41.7244	1.14503	0.296551	3.86116	0.000112852	0.000381736
HORVU7Hr1G038300	1872.46	-1.44275	0.104231	-13.8418	1.42517e-43	4.04365e-42
HORVU7Hr1G038330	115.889	2.61741	0.201715	12.9758	1.67863e-38	4.15979e-37
HORVU7Hr1G038370	279.629	1.53123	0.147763	10.3627	3.66339e-25	5.72334e-24
HORVU7Hr1G038570	24.5098	2.15308	0.387648	5.55421	2.78863e-08	1.49496e-07
HORVU7Hr1G038700	15.5792	1.28595	0.527465	2.43797	0.01477	0.0320673
HORVU7Hr1G039180	9.9077	4.34554	1.12874	3.84989	0.000118169	0.000398003
HORVU7Hr1G039760	357.473	1.24113	0.116105	10.6898	1.13646e-26	1.89153e-25
HORVU7Hr1G039800	92.8644	1.25904	0.215258	5.84899	4.94576e-09	2.86264e-08
HORVU7Hr1G039890	942.964	1.86053	0.0856464	21.7234	1.23427e-104	1.02314e-102
HORVU7Hr1G039900	74.4282	1.87809	0.2628	7.14647	8.90405e-13	6.97863e-12
HORVU7Hr1G040040	148.606	1.84599	0.197865	9.32953	1.06343e-20	1.33326e-19
HORVU7Hr1G040140	97.3913	2.32434	0.234822	9.8983	4.23407e-23	5.98661e-22
HORVU7Hr1G040480	70.8008	1.90722	0.244204	7.80995	5.72107e-15	5.23289e-14
HORVU7Hr1G040680	49.6924	1.82793	0.281495	6.49365	8.37828e-11	5.65273e-10
HORVU7Hr1G040690	12.6667	1.73275	0.599575	2.88997	0.00385281	0.0096334
HORVU7Hr1G040720	16.7083	2.71173	0.653819	4.14752	3.36091e-05	0.000123617
HORVU7Hr1G040730	1481.6	1.19483	0.227184	5.25929	1.44615e-07	7.23519e-07
HORVU7Hr1G040740	749.016	2.59757	0.147193	17.6474	1.0658e-69	5.28846e-68
HORVU7Hr1G040790	338.17	3.08101	0.148051	20.8104	3.48274e-96	2.62922e-94
HORVU7Hr1G040850	77.1945	2.38293	0.238521	9.99044	1.6783e-23	2.41826e-22
HORVU7Hr1G040860	53.9386	1.57027	0.293042	5.35852	8.39062e-08	4.30801e-07
HORVU7Hr1G041160	90.7138	2.65079	0.22819	11.6166	3.39456e-31	6.69974e-30
HORVU7Hr1G041230	118.75	2.19686	0.225309	9.7504	1.83748e-22	2.53034e-21
HORVU7Hr1G041300	77.8637	2.46925	0.346022	7.1361	9.60145e-13	7.5002e-12
HORVU7Hr1G041320	24.6762	1.10176	0.435441	2.53021	0.0113995	0.025517
HORVU7Hr1G041470	54.6053	1.20024	0.381807	3.14357	0.00166898	0.00452695
HORVU7Hr1G041500	229.943	1.84438	0.137302	13.433	3.87647e-41	1.04383e-39
HORVU7Hr1G041570	317.679	1.87228	0.145854	12.8367	1.02155e-37	2.45661e-36
HORVU7Hr1G041610	51.1662	1.01399	0.333845	3.03729	0.00238714	0.00627683
HORVU7Hr1G042120	1602.79	2.81359	0.0840702	33.4672	1.44568e-245	4.36556e-243
HORVU7Hr1G042260	38.6151	1.89286	0.396092	4.77884	1.7631e-06	7.78698e-06
HORVU7Hr1G042300	99.5479	2.2288	0.84308	2.64363	0.00820211	0.0190126
HORVU7Hr1G042480	1559.07	-1.33678	0.0822314	-16.2563	2.01625e-59	8.08717e-58
HORVU7Hr1G042740	17.9023	-1.1252	0.475047	-2.36861	0.0178552	0.0379283
HORVU7Hr1G043530	29.0106	1.57037	0.408794	3.84148	0.000122294	0.000410587
HORVU7Hr1G043540	1032.16	3.675	0.109381	33.5982	1.78099e-247	5.45601e-245
HORVU7Hr1G043620	3106.21	1.23578	0.0680063	18.1716	8.66421e-74	4.63656e-72
HORVU7Hr1G043800	106.702	1.6197	0.204391	7.92449	2.29076e-15	2.13973e-14
HORVU7Hr1G043810	235.289	2.39173	0.150309	15.9121	5.22151e-57	1.95349e-55
HORVU7Hr1G043880	98.7612	3.06569	0.260292	11.7779	5.07395e-32	1.02733e-30
HORVU7Hr1G043950	31.0271	1.19255	0.390234	3.05599	0.00224317	0.00593071
HORVU7Hr1G044100	51.3857	3.08914	0.332403	9.29337	1.49481e-20	1.86105e-19
HORVU7Hr1G044160	83.1717	2.36776	0.240829	9.83168	8.2235e-23	1.15271e-21
HORVU7Hr1G044210	50.8527	1.67999	0.318663	5.27201	1.34941e-07	6.76239e-07
HORVU7Hr1G044280	28.0896	1.34057	0.47913	2.79792	0.00514322	0.0124791
HORVU7Hr1G045000	15.894	1.31237	0.536079	2.44809	0.0143616	0.0312643
HORVU7Hr1G045280	250.564	-1.56521	0.14114	-11.0898	1.40624e-28	2.50421e-27
HORVU7Hr1G045630	31.5323	1.24483	0.321893	3.86721	0.00011009	0.000373048
HORVU7Hr1G045660	16.7269	1.29026	0.492547	2.61956	0.00880422	0.0202331
HORVU7Hr1G045940	24.7731	-2.0382	0.452687	-4.50246	6.71701e-06	2.75216e-05
HORVU7Hr1G046230	46.9526	-1.08977	0.256438	-4.24965	2.14105e-05	8.1194e-05
HORVU7Hr1G046820	18.5015	1.65598	0.454782	3.64127	0.000271295	0.000852861
HORVU7Hr1G047080	71.922	1.35835	0.246917	5.50123	3.77149e-08	2.00306e-07
HORVU7Hr1G047740	2.84022	4.07	1.49267	2.72666	0.0063979	0.0151817
HORVU7Hr1G047910	399.404	-1.39689	0.0986737	-14.1566	1.69925e-45	5.07326e-44
HORVU7Hr1G048430	74.3365	1.26739	0.227245	5.57719	2.44436e-08	1.31977e-07
HORVU7Hr1G048570	260.451	2.38541	0.157487	15.1466	7.97367e-52	2.70977e-50
HORVU7Hr1G048620	7.68148	1.61109	0.68306	2.35864	0.0183422	0.0388457
HORVU7Hr1G048710	517.718	-1.58524	0.118009	-13.4332	3.86124e-41	1.04106e-39
HORVU7Hr1G048970	7041.7	1.53016	0.0609052	25.1236	2.74455e-139	3.25923e-137
HORVU7Hr1G049140	188.207	1.70835	0.485879	3.51599	0.000438116	0.00132602
HORVU7Hr1G049580	75.1329	2.63945	0.26838	9.83474	7.97711e-23	1.1204e-21
HORVU7Hr1G049720	9.95732	1.73424	0.624947	2.77502	0.00551989	0.0133044
HORVU7Hr1G049960	5457.38	1.37603	0.056939	24.1668	4.9733e-129	5.36356e-127
HORVU7Hr1G050670	341.797	1.38808	0.411188	3.37578	0.000736071	0.00213753
HORVU7Hr1G050680	1117.55	1.2878	0.124664	10.3302	5.14379e-25	7.98893e-24
HORVU7Hr1G051110	2.92609	4.12937	1.44698	2.85378	0.00432029	0.010666
HORVU7Hr1G051140	415.578	1.15046	0.106597	10.7926	3.73151e-27	6.32025e-26
HORVU7Hr1G051260	162.103	-1.00705	0.203332	-4.95273	7.31777e-07	3.37294e-06
HORVU7Hr1G051420	43.7959	2.70489	0.338147	7.99918	1.25255e-15	1.19478e-14
HORVU7Hr1G052500	287.68	1.42919	0.126882	11.264	1.97567e-29	3.62516e-28
HORVU7Hr1G052560	1490.81	1.11556	0.0700247	15.9309	3.86464e-57	1.45357e-55
HORVU7Hr1G052770	36.9995	4.20869	0.466067	9.03023	1.71307e-19	2.02295e-18
HORVU7Hr1G053690	53.3846	-1.00597	0.319808	-3.14554	0.00165781	0.00450248
HORVU7Hr1G054020	257.446	1.72989	0.145369	11.9	1.18363e-32	2.44571e-31
HORVU7Hr1G054320	79.8954	2.91264	0.304777	9.55661	1.21675e-21	1.59848e-20
HORVU7Hr1G056880	17.8243	1.86512	0.498542	3.74114	0.000183184	0.00059599
HORVU7Hr1G057100	346.091	-1.35899	0.158036	-8.59919	8.02777e-18	8.7021e-17
HORVU7Hr1G057330	910.718	-1.47913	0.083929	-17.6235	1.62547e-69	7.99049e-68
HORVU7Hr1G057650	206.081	2.21846	0.153577	14.4452	2.68704e-47	8.37738e-46
HORVU7Hr1G057740	6.64603	2.28556	0.850843	2.68623	0.00722642	0.0169668
HORVU7Hr1G058090	18.9744	1.63656	0.566607	2.88835	0.00387263	0.00967951
HORVU7Hr1G058120	435596	-1.12101	0.0637448	-17.5859	3.15837e-69	1.54541e-67
HORVU7Hr1G058250	127.24	2.22091	0.218228	10.177	2.51182e-24	3.7763e-23
HORVU7Hr1G058730	3305.1	1.19043	0.0574466	20.7223	2.18101e-95	1.62905e-93
HORVU7Hr1G059000	35.2239	1.34782	0.304391	4.42793	9.51409e-06	3.8096e-05
HORVU7Hr1G059050	631.273	1.25841	0.132201	9.51888	1.7506e-21	2.27858e-20
HORVU7Hr1G059900	17.8481	1.06152	0.458094	2.31725	0.02049	0.0428745
HORVU7Hr1G060070	7.54877	1.96404	0.861205	2.28057	0.0225741	0.046699
HORVU7Hr1G065310	10.6287	-6.88652	1.2689	-5.42714	5.72646e-08	2.991e-07
HORVU7Hr1G065950	118.519	-1.18689	0.21306	-5.57067	2.53765e-08	1.36699e-07
HORVU7Hr1G069520	3666	-1.14642	0.108513	-10.5648	4.33778e-26	7.05323e-25
HORVU7Hr1G071280	141.265	1.1366	0.213099	5.33368	9.62424e-08	4.9021e-07
HORVU7Hr1G071390	43.9074	1.35629	0.347965	3.89778	9.708e-05	0.000332159
HORVU7Hr1G072670	478.586	-1.57181	0.097126	-16.1832	6.62425e-59	2.62708e-57
HORVU7Hr1G072680	70.5764	-2.45148	0.289119	-8.47915	2.26842e-17	2.3927e-16
HORVU7Hr1G072770	4.10991	-3.15514	1.22923	-2.56677	0.0102651	0.0232242
HORVU7Hr1G072960	83.9453	3.7969	0.309303	12.2757	1.22373e-34	2.6861e-33
HORVU7Hr1G073340	30.8315	3.26845	0.40243	8.12179	4.59349e-16	4.49108e-15
HORVU7Hr1G073350	37.8291	2.96943	0.406228	7.30975	2.67649e-13	2.18018e-12
HORVU7Hr1G074030	538.068	-1.11965	0.0979062	-11.4359	2.76547e-30	5.2616e-29
HORVU7Hr1G074640	1097.31	3.75416	0.145854	25.7392	4.2615e-146	5.36188e-144
HORVU7Hr1G074660	2270.24	2.82789	0.0859367	32.9066	1.76842e-237	4.98412e-235
HORVU7Hr1G075040	315.383	-1.56639	0.103191	-15.1795	4.8331e-52	1.64778e-50
HORVU7Hr1G075130	93.5139	2.03146	0.25355	8.01207	1.12798e-15	1.07888e-14
HORVU7Hr1G075710	48.2768	1.11856	0.321687	3.47717	0.000506736	0.00151548
HORVU7Hr1G075760	36.1518	3.09108	0.389911	7.92765	2.2334e-15	2.08892e-14
HORVU7Hr1G075960	5.19071	2.63197	0.938793	2.80357	0.005054	0.0122851
HORVU7Hr1G076680	28.8196	-1.10075	0.343836	-3.20138	0.00136772	0.00377871
HORVU7Hr1G077320	16.7009	1.77426	0.548532	3.23455	0.00121834	0.00339842
HORVU7Hr1G077600	31.4512	1.56177	0.35767	4.3665	1.26252e-05	4.96896e-05
HORVU7Hr1G077620	15.3372	3.01084	0.715961	4.20532	2.60714e-05	9.7591e-05
HORVU7Hr1G077840	32.8742	-1.45649	0.32386	-4.49728	6.88276e-06	2.81408e-05
HORVU7Hr1G077970	42.4612	1.40028	0.310536	4.50923	6.5062e-06	2.67304e-05
HORVU7Hr1G078380	143.89	1.70602	0.205871	8.28687	1.1627e-16	1.18103e-15
HORVU7Hr1G079030	1471.64	1.20347	0.073838	16.2988	1.00698e-59	4.07767e-58
HORVU7Hr1G079160	27.0785	1.62591	0.35098	4.63249	3.61288e-06	1.53471e-05
HORVU7Hr1G079600	1086.53	2.80287	0.0938976	29.8503	8.69995e-196	1.68715e-193
HORVU7Hr1G079810	175.377	1.06095	0.170541	6.22105	4.93841e-10	3.13572e-09
HORVU7Hr1G080020	13.8208	2.20287	0.5907	3.72925	0.000192049	0.000621578
HORVU7Hr1G080190	186.048	4.13469	0.216714	19.079	3.77303e-81	2.22777e-79
HORVU7Hr1G080490	60.8891	1.88023	0.290721	6.46747	9.96556e-11	6.67888e-10
HORVU7Hr1G081700	242.152	3.67132	0.229791	15.9768	1.85521e-57	7.04049e-56
HORVU7Hr1G081980	6.43923	2.44567	0.806754	3.03149	0.00243348	0.00638358
HORVU7Hr1G082280	1195.46	1.03225	0.110212	9.366	7.53303e-21	9.52921e-20
HORVU7Hr1G082730	71.7978	1.10554	0.234995	4.70452	2.54465e-06	1.09953e-05
HORVU7Hr1G082830	13.5576	2.92738	0.648899	4.51131	6.44285e-06	2.64843e-05
HORVU7Hr1G082850	11.4401	1.76152	0.570487	3.08776	0.00201673	0.00537847
HORVU7Hr1G082860	125.268	1.46989	0.178007	8.2575	1.4875e-16	1.50085e-15
HORVU7Hr1G082970	11.0235	1.46066	0.598513	2.44049	0.0146674	0.0318709
HORVU7Hr1G082980	19.2889	2.18581	0.500506	4.3672	1.25851e-05	4.95575e-05
HORVU7Hr1G083090	19.9513	1.11492	0.456778	2.44083	0.0146534	0.0318438
HORVU7Hr1G083180	61.7884	1.87615	0.266134	7.04964	1.79381e-12	1.37933e-11
HORVU7Hr1G083270	210.936	4.14546	0.20882	19.8518	1.06274e-87	7.02008e-86
HORVU7Hr1G083440	2.33846	4.29633	1.53358	2.8015	0.00508659	0.0123601
HORVU7Hr1G083530	19.9503	1.97825	0.41373	4.7815	1.73994e-06	7.68948e-06
HORVU7Hr1G083550	1858.72	2.49444	0.139923	17.8273	4.33776e-71	2.21477e-69
HORVU7Hr1G084140	27.1459	5.05496	0.648715	7.79227	6.58177e-15	5.98646e-14
HORVU7Hr1G084230	271.043	1.11317	0.134972	8.24743	1.61841e-16	1.6275e-15
HORVU7Hr1G084500	32.2339	2.91383	0.39709	7.33796	2.16878e-13	1.77826e-12
HORVU7Hr1G084610	152.551	2.58118	0.199764	12.9212	3.41933e-38	8.4044e-37
HORVU7Hr1G084750	140.039	-1.01384	0.428372	-2.36672	0.0179466	0.0381071
HORVU7Hr1G084920	141.048	3.37736	0.226924	14.8832	4.2358e-50	1.38387e-48
HORVU7Hr1G085170	6.34461	4.98025	1.36334	3.65297	0.000259227	0.000817477
HORVU7Hr1G085180	1416.93	1.90462	0.0857575	22.2093	2.79157e-109	2.42832e-107
HORVU7Hr1G085270	102.671	-1.22237	0.179923	-6.79386	1.09172e-11	7.95202e-11
HORVU7Hr1G085450	30010.5	3.30209	0.0613067	53.8618	0	0
HORVU7Hr1G086120	160.224	3.1079	0.232936	13.3423	1.31395e-40	3.47613e-39
HORVU7Hr1G086250	50.161	2.47275	0.344936	7.16873	7.5699e-13	5.96839e-12
HORVU7Hr1G086330	65.4839	2.14712	0.315943	6.79591	1.07632e-11	7.84523e-11
HORVU7Hr1G086340	579.131	2.07391	0.0993557	20.8736	9.30398e-97	7.09991e-95
HORVU7Hr1G086390	74.637	1.0551	0.26856	3.92871	8.54022e-05	0.000295552
HORVU7Hr1G086580	700.19	1.01801	0.0814451	12.4993	7.53065e-36	1.70981e-34
HORVU7Hr1G086640	73.1575	-1.5565	0.206924	-7.52208	5.39104e-14	4.61734e-13
HORVU7Hr1G086670	7.0512	2.4979	0.90718	2.75348	0.00589651	0.0140996
HORVU7Hr1G087170	51.653	1.01925	0.327382	3.11334	0.00184982	0.00497664
HORVU7Hr1G087250	4.32605	3.70613	1.38345	2.6789	0.00738637	0.0173048
HORVU7Hr1G087420	90.1104	1.81936	0.212219	8.57302	1.00808e-17	1.08442e-16
HORVU7Hr1G087700	13.6243	1.6352	0.503827	3.24555	0.00117223	0.00328192
HORVU7Hr1G087900	73.1413	1.04445	0.230486	4.53152	5.85605e-06	2.42336e-05
HORVU7Hr1G088280	6.54382	2.74671	0.894476	3.07075	0.0021352	0.00566581
HORVU7Hr1G088320	6.02744	1.98394	0.863719	2.29698	0.02162	0.0449674
HORVU7Hr1G088430	554.843	2.32985	0.124909	18.6523	1.2101e-77	6.85767e-76
HORVU7Hr1G088600	10.5904	2.45027	0.659896	3.71312	0.000204719	0.000659156
HORVU7Hr1G088610	54.4411	1.78796	0.336476	5.31377	1.07383e-07	5.43807e-07
HORVU7Hr1G088730	130.363	1.02083	0.176816	5.77342	7.7679e-09	4.40514e-08
HORVU7Hr1G088890	119.855	3.98134	0.344331	11.5626	6.37765e-31	1.24709e-29
HORVU7Hr1G089160	291.712	1.10439	0.154571	7.14489	9.00672e-13	7.05649e-12
HORVU7Hr1G089300	16.059	2.17008	0.618281	3.50986	0.000448342	0.00135329
HORVU7Hr1G089500	183.699	1.10976	0.153883	7.21172	5.52504e-13	4.4071e-12
HORVU7Hr1G089530	125.361	2.73222	0.219735	12.4341	1.7055e-35	3.82705e-34
HORVU7Hr1G089880	53.6703	-1.31221	0.296128	-4.43124	9.36923e-06	3.75872e-05
HORVU7Hr1G090560	89.4039	1.13329	0.195018	5.81122	6.20177e-09	3.54977e-08
HORVU7Hr1G090830	819.875	1.71969	0.0757696	22.6963	4.8727e-114	4.5374e-112
HORVU7Hr1G090950	179.838	1.35633	0.184676	7.34434	2.06774e-13	1.6974e-12
HORVU7Hr1G091080	13.5367	4.68102	0.859196	5.44814	5.08986e-08	2.67237e-07
HORVU7Hr1G091100	1378.7	1.74977	0.0886789	19.7316	1.15537e-86	7.44581e-85
HORVU7Hr1G091800	31.9574	4.60062	0.567069	8.11298	4.93928e-16	4.81802e-15
HORVU7Hr1G091860	324.82	1.82892	0.144937	12.6187	1.66533e-36	3.83461e-35
HORVU7Hr1G092040	8.94239	1.95003	0.643874	3.02859	0.00245701	0.00643571
HORVU7Hr1G092510	278.897	1.64893	0.13791	11.9566	5.99908e-33	1.24566e-31
HORVU7Hr1G093080	130.558	-1.15744	0.181275	-6.38499	1.71412e-10	1.12911e-09
HORVU7Hr1G093190	27.7936	1.13959	0.378941	3.00731	0.00263568	0.00685278
HORVU7Hr1G093260	368.296	1.29702	0.120682	10.7474	6.09513e-27	1.02824e-25
HORVU7Hr1G093310	15.1258	1.42673	0.478762	2.98004	0.00288209	0.00743218
HORVU7Hr1G093490	14.3512	1.49429	0.619646	2.41152	0.0158862	0.0342272
HORVU7Hr1G093580	1338.35	1.40258	0.100967	13.8915	7.13748e-44	2.04434e-42
HORVU7Hr1G093790	2.98724	4.6578	1.41165	3.29954	0.000968445	0.00274889
HORVU7Hr1G094110	251.004	1.51602	0.168354	9.00495	2.15767e-19	2.54229e-18
HORVU7Hr1G095230	28.6003	3.80965	0.568234	6.70437	2.02284e-11	1.43679e-10
HORVU7Hr1G095720	1559.46	1.02466	0.158803	6.45238	1.10107e-10	7.36532e-10
HORVU7Hr1G096040	10.6956	-1.97927	0.74869	-2.64364	0.00820187	0.0190126
HORVU7Hr1G096560	430.8	-1.31951	0.115569	-11.4175	3.41878e-30	6.46388e-29
HORVU7Hr1G096660	83.7952	1.66239	0.203578	8.16583	3.19237e-16	3.16364e-15
HORVU7Hr1G096820	4.69941	3.63209	1.36944	2.65225	0.00799572	0.0185811
HORVU7Hr1G096870	43.8857	3.07021	0.394723	7.77815	7.3591e-15	6.65341e-14
HORVU7Hr1G096970	307.36	-1.39617	0.12792	-10.9145	9.83173e-28	1.70627e-26
HORVU7Hr1G097000	2.74219	3.19733	1.40091	2.28232	0.0224705	0.0465304
HORVU7Hr1G097270	4.90358	2.65256	1.01811	2.60538	0.00917717	0.0209738
HORVU7Hr1G097350	119.819	4.85237	0.311914	15.5568	1.43141e-54	5.1024e-53
HORVU7Hr1G098010	4386.88	1.46565	0.062606	23.4108	3.32102e-121	3.28036e-119
HORVU7Hr1G098110	17.0923	1.93686	0.445438	4.34823	1.37243e-05	5.36337e-05
HORVU7Hr1G098330	644.475	1.07453	0.100132	10.7311	7.27137e-27	1.2218e-25
HORVU7Hr1G098370	1965.92	-1.62036	0.0861892	-18.8001	7.53928e-79	4.35425e-77
HORVU7Hr1G098810	17.7772	4.00246	0.70331	5.69089	1.26382e-08	7.05055e-08
HORVU7Hr1G098830	30.7608	1.16353	0.352122	3.30432	0.000952065	0.00270639
HORVU7Hr1G098960	49.7351	4.26401	0.416868	10.2287	1.47479e-24	2.25246e-23
HORVU7Hr1G098970	6.68593	6.15706	1.32914	4.63237	3.61503e-06	1.53505e-05
HORVU7Hr1G099030	78.3951	1.38632	0.236662	5.8578	4.6903e-09	2.71999e-08
HORVU7Hr1G099260	24.1782	3.96682	0.552491	7.17988	6.97714e-13	5.51957e-12
HORVU7Hr1G099320	287.314	1.87092	0.132198	14.1524	1.80406e-45	5.37859e-44
HORVU7Hr1G099330	22.935	1.77616	0.418672	4.24237	2.21171e-05	8.37085e-05
HORVU7Hr1G099340	495.313	2.43666	0.131465	18.5347	1.08325e-76	6.07368e-75
HORVU7Hr1G099370	46.6895	1.70566	0.317446	5.37307	7.7407e-08	4.00154e-07
HORVU7Hr1G099390	479.326	2.4776	0.105296	23.5298	2.021e-122	2.01509e-120
HORVU7Hr1G099520	39.3116	2.45942	0.443381	5.54697	2.90665e-08	1.55664e-07
HORVU7Hr1G100040	6.41178	1.87809	0.716442	2.62141	0.00875668	0.0201435
HORVU7Hr1G100090	122.44	2.11377	0.270137	7.82479	5.08496e-15	4.66114e-14
HORVU7Hr1G100140	22.4417	-1.00494	0.373667	-2.68939	0.00715824	0.0168273
HORVU7Hr1G100220	32.719	2.68041	0.555315	4.82682	1.38733e-06	6.2038e-06
HORVU7Hr1G100740	18.2254	2.1138	0.729078	2.89928	0.00374017	0.00939336
HORVU7Hr1G101050	59.6658	1.2	0.240761	4.98422	6.22127e-07	2.89468e-06
HORVU7Hr1G101220	394.715	1.28725	0.119736	10.7507	5.88183e-27	9.93052e-26
HORVU7Hr1G101240	1077.35	2.17903	0.104593	20.8335	2.15141e-96	1.62998e-94
HORVU7Hr1G101300	8.18433	1.8523	0.674395	2.7466	0.00602156	0.0143645
HORVU7Hr1G101700	30.4736	4.19889	0.522599	8.03463	9.3863e-16	9.03495e-15
HORVU7Hr1G101740	279.991	1.48267	0.131509	11.2744	1.7566e-29	3.2316e-28
[truncated: 1,314 more rows]
