# Supplementary material for: Physiological Changes in Barley mlo-11 Powdery Mildew Resistance Conditioned by Tandem Repeat Copy Number
Source: Int J Mol Sci. 2020 Nov 20;21(22):8769. doi: 10.3390/ijms21228769 (PMC7699567; doi:10.3390/ijms21228769)
Supplement: Supplementary file 1 [file ijms-21-08769-s001.zip › SupplementaryTable3.xlsx]

## Sheet: Sheet1
Supplementary Table 3. PCR primers used in theis study: mlo-11 primers to identify alleles with the mlo-11 repeat subunit compared to wild-type Mlo during introgression; CAPS primers to confirm cv Baudin Mlo and mlo-11(cnv2) alleles during introgression; Digital PCR primers and Taqman probe primers to confirm mlo-11 copy number stability; chromatin immuno-precipitation (ChIP) primers for each of …
mlo11-F	GTTGCCACACTTTGCCACG
mlo11-R	ACTTCCTCCATGCTTCATTTCG
CAPSMite-F	TCAAACTCGGAATGCCACG				CAPS SNP enzyme: HinfI
CAPSMite-R	CTTGAATGATCTAGCCAAAAACG
Digitalpcr_mloF	TATGTTCATTTTTTGTGTCCTTTCAG				DNA digestion restriction enzyme: Msel
Digitalpcr_mloR	GGCAGATAAGAAGCTAAAAAACTCAC
Digitalpcr_ActinF	TGTAAGGGACATCAAGGAGAAGC
Digitalpcr_ActinR	GGAAGCTCGTAGCTCTTCTCAAC
Digitalpcr_mloTaqmanVIC	CTCTCCAGCACCCCTGGCATC
Digitalpcr_ActinTaqmanFAM	GGAGCTGGAGACTGCCAAGAACAG
ChIP1F	CGTTTTTGGCTAGATCATTCAAG
ChIP1R	CTTCCTCCATGCTTCATTTCG
ChIP2F	GCATTACGTTTTACAAAAAAAAACTAG
ChIP2R	GCATAAGGAGGCAATTCAGAATGTTC
ChIP3F	AAATTAAACGTCAAAGAGAAAAAAACTC
ChIP3R	TTTTGTTGCCATCGTTTGACTAG
ChIP4F	CTTCATATCCCTGCTCCTCATC
ChIP4R	GGCAGTAGTCAACGTACTTGCTG
ChIP5F	TATGTTCATTTTTTGTGTCCTTTCAG
ChIP5R	GGCAGATAAGAAGCTAAAAAACTCAC
ChIP6F	CACCCTCTTCCTTGACATCAATG
ChIP6R	CCCTATGAGTAGAAAAAGAAATGGTTG
mloBiF1	AGGYAAGAAAGGAAAAGAAATAGTG
mloBiR1	CRACCRATRTTTTCATCCTA
mloBi2F	TAGGATGAAAAYATYGGTYG
mloBi2R	CCRRCACCCCTTTTTTRTCC
WRKY33F	TCGACCATCATGGCGGCG
WRKY33R	CGTACTTGCGCCAGTTGAGG
DMresistanceF	CTAGACAAGCACAGCATCATCG
DMresistanceR	GGGTGGCAATGAAGGCGTAG
WRKYGQF	CGGAGCGGCACCAGTGC
WRKYGQR	CGCCGAGCGTGGCGGAGAAG
POXperoxidaseF	GTTCCTGAGGACCAAGTGCCCCG
POXperoxidaseR	GCGAGCAGGCCGCCGCCGTC
ThaumatinTLP7F	CAAGTCCTCCATGGCGTCATCTC
ThaumatinTLP7R	CCGGTTGACGACGGTGATGGTG
PR1aF	GACTACCTTTCACCCCACAACG
PR1aR	GTCCGCCGCCTTCCAGTC
PR1F	GGGTGGACGAGAAGAAGGATTACG
PR1R	CGCCGCCGTTGTTGTTGC
NOXoxidaseF	CGCGCGTGGTGTACGCGAGCTTC
NOXoxidaseR	GGCACCGACGGCCAGCCGTTC
PR1B-2F	TGGTATAGAGCAGGCCCATAGAA
PR1B-2R	GTGTTGGAGCCGTAGTCGTAGT
ChitinaseF	GGCGTGGGCTCGGTCATCAC
ChitinaseR	TCGTACGTGTAGAACCCCCTG
ActinF	TGTAAGGGACATCAAGGAGAAGC
ActinR	GGAAGCTCGTAGCTCTTCTCAAC
